# Supplementary material for: Drivers of nitrogen and phosphorus dynamics in a groundwater-fed urban catchment revealed by high-frequency monitoring
Source: Copernicus journal article supplement (doi:10.5194/hess-25-69-2021), 2021-01-05
Supplement: Supplementary file 1 [file Data.xlsx]

## Sheet: 2016-2017 ts & grab data
	Water quality time series				Water quality discrete sampling								Meteological and hydrological data (hourly and daily)
	EC	TP	NH4	Turbidity	EC grab	NH4 grab	Cl grab	chlorophyll-a	suspended solids	TP grab	O2 grab	Fe grab	rainfall	pump hourly	pump daily	swlevel	watertemp	sunshine	rain surplus		rainfall	evapo	sunshine	gwlevel
	us/cm	mg P/L	mg N/L	FNU	us/cm	mg N/L	mg/L	ug/L	mg/L	mg P/L	mg/L	mg/L	mm/h	m3/h	m3/d	mNAP	°C	h/h	mm/d		mm/d	mm/d	h/d	mNAP
2016-03-08 10:00:00					890	2.4	87	5	4	0.37	4.3									2016-05-01 10:00:00	0
2016-03-14 10:00:00					1415		174													2016-05-02 10:00:00	0.1	2.9	8.1
2016-03-18 10:00:00					1095		166													2016-05-03 10:00:00	4.2	3.4	13
2016-03-26										0.496										2016-05-04 10:00:00	0	3.2	11.2
2016-03-26 10:00:00					1165		180					1.57								2016-05-05 10:00:00	0	4.2	14.2
2016-04-01										0.356										2016-05-06 10:00:00	0	4.4	13.6
2016-04-01 10:00:00					1054		154					1.7								2016-05-07 10:00:00	0	4.6	14.2
2016-04-05 10:00:00					1110	0.9	130	120	24	0.4										2016-05-08 10:00:00	0	4.9	14.2
2016-04-08										0.616										2016-05-09 10:00:00	0	4.7	13.6	-3.87
2016-04-08 10:00:00					1117		170					1.76								2016-05-10 10:00:00	0	2.2	0.4	-3.86
2016-04-15										0.706										2016-05-11 10:00:00	0	3.8	9	-3.86
2016-04-15 10:00:00					1129		146					1.75								2016-05-12 10:00:00	0	4.6	14.1	-3.89
2016-04-22										0.726										2016-05-13 10:00:00	0	4.4	12.7	-3.91
2016-04-22 10:00:00					1073		146					1.93								2016-05-14 10:00:00	1.1	2.7	7.4	-3.92
2016-04-29										0.606										2016-05-15 10:00:00	0.6	2.4	6.9	-3.91
2016-04-29 10:00:00					1028		142				14.36	1.7								2016-05-16 10:00:00	0.6	2.4	5.2	-3.89
2016-05-01 02:00:00														0		-4.296				2016-05-17 10:00:00	0	3.3	8	-3.88
2016-05-01 03:00:00														0		-4.293				2016-05-18 10:00:00	5.2	1.9	2.8	-3.9
2016-05-01 04:00:00													0	0		-4.29		0		2016-05-19 10:00:00	0	2.3	3.6	-3.91
2016-05-01 05:00:00													0	0		-4.288		0		2016-05-20 10:00:00	1.2	1.8	2.3	-3.9
2016-05-01 06:00:00													0	0		-4.286		0		2016-05-21 10:00:00	0	2.7	2.5	-3.88
2016-05-01 07:00:00													0	0		-4.283		0.2		2016-05-22 10:00:00	12.3	0.9	0	-3.91
2016-05-01 08:00:00													0	0		-4.281		1		2016-05-23 10:00:00	9.1	1.3	0	-3.9
2016-05-01 09:00:00													0	0		-4.279		1		2016-05-24 10:00:00	0	2.4	2.6	-3.88
2016-05-01 10:00:00													0	0	0	-4.277		1		2016-05-25 10:00:00	2.3	1.4	1.5	-3.89
2016-05-01 11:00:00													0	0		-4.276		1		2016-05-26 10:00:00	0	3.3	7.4	-3.88
2016-05-01 12:00:00													0	0		-4.274		1		2016-05-27 10:00:00	0	4.1	11.5	-3.89
2016-05-01 13:00:00													0	0		-4.273		1		2016-05-28 10:00:00	0	4.6	11.9	-3.88
2016-05-01 14:00:00													0	0		-4.271		1		2016-05-29 10:00:00	0.1	1.9	2.1	-3.87
2016-05-01 15:00:00													0	0		-4.27		1		2016-05-30 10:00:00	16.9	2.1	2.1	-3.89
2016-05-01 16:00:00													0	0		-4.268		1		2016-05-31 10:00:00	0	3.6	8.6	-3.89
2016-05-01 17:00:00													0	0		-4.267		0.1		2016-06-01 10:00:00	0	3.2	5.9	-3.89
2016-05-01 18:00:00													0	0		-4.265		1		2016-06-02 10:00:00	0.5	0.9	0	-3.88
2016-05-01 19:00:00													0	0		-4.264		1		2016-06-03 10:00:00	0	1.7	2.5	-3.89
2016-05-01 20:00:00													0	0		-4.263		1		2016-06-04 10:00:00	0.1	4.8	12.1	-3.91
2016-05-01 21:00:00													0	0		-4.261		0.5		2016-06-05 10:00:00	0	5.2	15.3	-3.91
2016-05-01 22:00:00													0	0		-4.26		0		2016-06-06 10:00:00	0	5.2	15.3	-3.92
2016-05-01 23:00:00													0	0		-4.259		0		2016-06-07 10:00:00	0	4.4	7.7	-3.92
2016-05-02													0	0		-4.258		0		2016-06-08 10:00:00	0	4.4	10.5	-3.92
2016-05-02 01:00:00													0	0		-4.257		0		2016-06-09 10:00:00	0	4.8	13.6	-3.91
2016-05-02 02:00:00													0	0		-4.255		0		2016-06-10 10:00:00	0	3.9	7	-3.91
2016-05-02 03:00:00													0	0		-4.254		0		2016-06-11 10:00:00	0.8	2.3	1.8	-3.9
2016-05-02 04:00:00													0	0		-4.253		0		2016-06-12 10:00:00	7	2.8	2.6	-3.89
2016-05-02 05:00:00													0	0		-4.252		0		2016-06-13 10:00:00	3.6	1.6	1.2	-3.88
2016-05-02 06:00:00													0	0		-4.25		0		2016-06-14 10:00:00	7.6	1.7	3.1	-3.89
2016-05-02 07:00:00													0	0		-4.249		0.5		2016-06-15 10:00:00	3.5	2	2.8	-3.9
2016-05-02 08:00:00													0	0		-4.248		1		2016-06-16 10:00:00	10.6	3	6.9	-3.92
2016-05-02 09:00:00													0	0		-4.247		0.9		2016-06-17 10:00:00	6.7	3.6	7.8	-3.94
2016-05-02 10:00:00													0	0	0	-4.246		1		2016-06-18 10:00:00	0.7	2	2.9	-3.95
2016-05-02 11:00:00													0	0		-4.245		1		2016-06-19 10:00:00	0	3.7	8.5	-3.88
2016-05-02 12:00:00													0	0		-4.244		1	-2.8	2016-06-20 10:00:00	21.8	0.7	0.1	-3.9
2016-05-02 13:00:00													0	0		-4.243		0.9		2016-06-21 10:00:00	1.3	1.7	2.2	-3.91
2016-05-02 14:00:00													0	0		-4.242		0.7		2016-06-22 10:00:00	0	4.2	10.9	-3.88
2016-05-02 15:00:00													0	0		-4.241		0.6		2016-06-23 10:00:00	37.6	2.6	4.3	-3.86
2016-05-02 16:00:00													0	0		-4.24		0.4		2016-06-24 10:00:00	0	3.3	7.3	-3.85
2016-05-02 17:00:00													0	0		-4.239		0.1		2016-06-25 10:00:00	0	2.2	4.5	-3.87
2016-05-02 18:00:00													0	0		-4.238		0		2016-06-26 10:00:00	0.2	4.3	12.5	-3.87
2016-05-02 19:00:00													0	0		-4.236		0		2016-06-27 10:00:00	3.8	2.3	5.3	-3.88
2016-05-02 20:00:00													0.1	0		-4.235		0		2016-06-28 10:00:00	6.2	2.6	3.8	-3.84
2016-05-02 21:00:00														0		-4.234		0		2016-06-29 10:00:00	1.1	3.2	5.5	-3.85
2016-05-02 22:00:00													0	0		-4.233		0		2016-06-30 10:00:00	12.6	1.7	1.9	-3.85
2016-05-02 23:00:00													0	0		-4.232		0		2016-07-01 10:00:00	7.9	0.8	0	-3.84
2016-05-03													0	0		-4.231		0		2016-07-02 10:00:00	0.1	4.3	12.8	-3.87
2016-05-03 01:00:00														78.96		-4.231		0		2016-07-03 10:00:00	11.6	4.2	12.2	-3.87
2016-05-03 02:00:00													3.5	216		-4.232		0		2016-07-04 10:00:00	0	4.5	13.4	-3.86
2016-05-03 03:00:00													0.7	216		-4.235		0		2016-07-05 10:00:00	0.9	1.7	3.6	-3.89
2016-05-03 04:00:00														216		-4.242		0		2016-07-06 10:00:00	0.5	4.3	12.7	-3.89
2016-05-03 05:00:00														216		-4.249		0		2016-07-07 10:00:00	0	3.5	6.6	-3.87
2016-05-03 06:00:00													0	216		-4.258		0		2016-07-08 10:00:00	2	1.9	2.9	-3.88
2016-05-03 07:00:00													0	216		-4.266		0.3		2016-07-09 10:00:00	0	3.1	4	-3.86
2016-05-03 08:00:00													0	3.6		-4.27		0.7		2016-07-10 10:00:00	0	4	6.2	-3.87
2016-05-03 09:00:00													0	0		-4.27		1		2016-07-11 10:00:00	0	3.1	6.8	-3.89
2016-05-03 10:00:00					1060	0.03	140	380	40	0.77	11.4		0	0	1379	-4.268		1		2016-07-12 10:00:00	0.7	3.4	8	-3.91
2016-05-03 11:00:00													0	0		-4.266		1		2016-07-13 10:00:00	1	3	6.9	-3.91
2016-05-03 12:00:00													0	0		-4.264		1	0.8	2016-07-14 10:00:00	0	3.6	10.7	-3.92
2016-05-03 13:00:00													0	0		-4.262		0.9		2016-07-15 10:00:00	0	4	9.5	-3.92
2016-05-03 14:00:00													0	0		-4.26		0.9		2016-07-16 10:00:00	0	2	1.2	-3.91
2016-05-03 15:00:00													0	0		-4.258		0.8		2016-07-17 10:00:00	0.4	4.1	9.4	-3.92
2016-05-03 16:00:00													0	0		-4.256		1		2016-07-18 10:00:00	0	5	13.3	-3.91
2016-05-03 17:00:00													0	0		-4.254		0.9		2016-07-19 10:00:00	0	5.2	14.9	-3.9
2016-05-03 18:00:00													0	0		-4.253		1		2016-07-20 10:00:00	0	4.7	11.4	-3.92
2016-05-03 19:00:00													0	0		-4.251		1		2016-07-21 10:00:00	0	4.6	11.5	-3.92
2016-05-03 20:00:00													0	0		-4.25		1		2016-07-22 10:00:00	0	2.3	3.2	-3.92
2016-05-03 21:00:00													0	0		-4.248		0.5		2016-07-23 10:00:00	0	3.3	5.4	-3.94
2016-05-03 22:00:00													0	0		-4.247		0		2016-07-24 10:00:00	0	3.2	6.2	-3.93
2016-05-03 23:00:00													0	0		-4.246		0		2016-07-25 10:00:00	0	2.2	4.3	-3.93
2016-05-04													0	0		-4.245		0		2016-07-26 10:00:00	0	4.1	11.1	-3.92
2016-05-04 01:00:00													0	0		-4.244		0		2016-07-27 10:00:00	7.2	1.8	2.5	-3.92
2016-05-04 02:00:00													0	0		-4.243		0		2016-07-28 10:00:00	0.2	2.3	1.5	-3.91
2016-05-04 03:00:00													0	0		-4.242		0		2016-07-29 10:00:00	1.4	1.9	2.2	-3.92
2016-05-04 04:00:00													0	0		-4.241		0		2016-07-30 10:00:00	0.1	2.1	1.1	-3.93
2016-05-04 05:00:00													0	0		-4.24		0		2016-07-31 10:00:00	2	2.9	6.9	-3.92
2016-05-04 06:00:00													0	0		-4.239		0		2016-08-01 10:00:00	0	3.7	9.5	-3.91
2016-05-04 07:00:00													0	0		-4.238		0.3		2016-08-02 10:00:00	7.8	1.3	0.1	-3.9
2016-05-04 08:00:00													0	0		-4.237		1		2016-08-03 10:00:00	2.1	1.6	2	-3.92
2016-05-04 09:00:00													0	0		-4.236		1		2016-08-04 10:00:00	0	2.6	6.4	-3.95
2016-05-04 10:00:00													0	0	0	-4.235		1		2016-08-05 10:00:00	1.9	3.1	9.2	-3.95
2016-05-04 11:00:00													0	0		-4.234		1		2016-08-06 10:00:00	8.3	3.5	9	-3.94
2016-05-04 12:00:00													0	0		-4.233		1	-3.2	2016-08-07 10:00:00	0	1.8	4.1	-3.91
2016-05-04 13:00:00													0	0		-4.232		1		2016-08-08 10:00:00	0	2.9	5.7	-3.92
2016-05-04 14:00:00													0	0		-4.232		0.6		2016-08-09 10:00:00	15.3	2.9	7.4	-3.92
2016-05-04 15:00:00													0	0		-4.231		1		2016-08-10 10:00:00	4.9	3.1	11.3	-3.92
2016-05-04 16:00:00													0	0		-4.23		0.4		2016-08-11 10:00:00	10.7	0.9	0.1	-3.9
2016-05-04 17:00:00													0	0		-4.229		0.3		2016-08-12 10:00:00	1.8	1.9	4.3	-3.9
2016-05-04 18:00:00													0	0		-4.228		0.3		2016-08-13 10:00:00	0	1.8	2.2	-3.91
2016-05-04 19:00:00													0	0		-4.227		0.8		2016-08-14 10:00:00	0	2.3	1.8	-3.91
2016-05-04 20:00:00													0	0		-4.227		1		2016-08-15 10:00:00	0	3.9	12.7	-3.9
2016-05-04 21:00:00													0	0		-4.225		0.5		2016-08-16 10:00:00	0	4	12	-3.88
2016-05-04 22:00:00													0	0		-4.225		0		2016-08-17 10:00:00	0	4.2	13.5	-3.89
2016-05-04 23:00:00													0	0		-4.224		0		2016-08-18 10:00:00	0	4.1	13.3	-3.89
2016-05-05													0	206.16		-4.227		0		2016-08-19 10:00:00	26.9	2.1	4.6	-3.9
2016-05-05 01:00:00													0	216		-4.234		0		2016-08-20 10:00:00	0	3.1	9.3	-3.91
2016-05-05 02:00:00													0	216		-4.243		0		2016-08-21 10:00:00	44.8	1.5	3.9	-3.91
2016-05-05 03:00:00													0	216		-4.252		0		2016-08-22 10:00:00	6.2	1.8	4.4	-3.89
2016-05-05 04:00:00													0	216		-4.261		0		2016-08-23 10:00:00	0	4	12.6	-3.89
2016-05-05 05:00:00													0	216		-4.27		0		2016-08-24 10:00:00	0	4.2	13	-3.87
2016-05-05 06:00:00													0	216		-4.278		0		2016-08-25 10:00:00	0	4.2	12.7	-3.88
2016-05-05 07:00:00													0	216		-4.287		0.5		2016-08-26 10:00:00	0	3.1	9	-3.87
2016-05-05 08:00:00													0	10.26		-4.291		1		2016-08-27 10:00:00	0	3.6	10.3	-3.87
2016-05-05 09:00:00													0	0		-4.291		1		2016-08-28 10:00:00	2	2.4	5.8	-3.92
2016-05-05 10:00:00													0	0	1728	-4.289		1		2016-08-29 10:00:00	1.2	2.7	7.3	-3.93
2016-05-05 11:00:00													0	0		-4.286		1		2016-08-30 10:00:00	0	2.9	10.2	-3.91
2016-05-05 12:00:00													0	0		-4.283		1	-4.2	2016-08-31 10:00:00	0	3.4	12.7	-3.92
2016-05-05 13:00:00													0	0		-4.281		1		2016-09-01 10:00:00	0	3.1	10.1	-3.91
2016-05-05 14:00:00													0	0		-4.279		1		2016-09-02 10:00:00	0.1	2	2.1	-3.9
2016-05-05 15:00:00													0	0		-4.276		1		2016-09-03 10:00:00	3.7	2.5	5.4	-3.9
2016-05-05 16:00:00													0	0		-4.274		1		2016-09-04 10:00:00	3.7	1.7	3.4	-3.92
2016-05-05 17:00:00													0	0		-4.272		1		2016-09-05 10:00:00	0.8	2.8	10.2	-3.92
2016-05-05 18:00:00													0	0		-4.27		1		2016-09-06 10:00:00	0	1.4	1.7	-3.9
2016-05-05 19:00:00													0	0		-4.268		1		2016-09-07 10:00:00	0	3.4	12	-3.91
2016-05-05 20:00:00													0	0		-4.266		1		2016-09-08 10:00:00	0	3.2	12.2	-3.92
2016-05-05 21:00:00													0	0		-4.265		0.7		2016-09-09 10:00:00	0	2.6	10	-3.92
2016-05-05 22:00:00													0	0		-4.263		0		2016-09-10 10:00:00	0	2.9	9.2	-3.93
2016-05-05 23:00:00													0	0		-4.262		0		2016-09-11 10:00:00	0.2	1.8	2.6	-3.93
2016-05-06													0	0		-4.261		0		2016-09-12 10:00:00	0	2.8	8.3	-3.91
2016-05-06 01:00:00													0	0		-4.26		0		2016-09-13 10:00:00	0	3.2	11.7	-3.92
2016-05-06 02:00:00													0	0		-4.258		0		2016-09-14 10:00:00	0	3.1	10.6	-3.92
2016-05-06 03:00:00													0	0		-4.258		0		2016-09-15 10:00:00	0	2.8	8.8	-3.93
2016-05-06 04:00:00													0	0		-4.256		0		2016-09-16 10:00:00	1.5	1.5	3.3	-3.94
2016-05-06 05:00:00													0	0		-4.255		0		2016-09-17 10:00:00	0	1.3	1.2	-3.95
2016-05-06 06:00:00													0	0		-4.254		0		2016-09-18 10:00:00	0	2.5	8.4	-3.94
2016-05-06 07:00:00													0	0		-4.253		0.3		2016-09-19 10:00:00	0	1.2	1.2	-3.94
2016-05-06 08:00:00													0	0		-4.252		1		2016-09-20 10:00:00	0	1.4	3.8	-3.94
2016-05-06 09:00:00													0	0		-4.251		1		2016-09-21 10:00:00	0	2	6	-3.94
2016-05-06 10:00:00													0	0	0	-4.25		1		2016-09-22 10:00:00	0	1.5	3.5	-3.95
2016-05-06 11:00:00													0	0		-4.249		1		2016-09-23 10:00:00	0	2.3	10	-3.93
2016-05-06 12:00:00													0	0		-4.248		1	-4.4	2016-09-24 10:00:00	0	2.4	10.4	-3.92
2016-05-06 13:00:00													0	0		-4.247		1		2016-09-25 10:00:00	0	1.8	7	-3.96
2016-05-06 14:00:00													0	0		-4.246		1		2016-09-26 10:00:00	0	1.3	2.1	-3.96
2016-05-06 15:00:00													0	0		-4.245		0.9		2016-09-27 10:00:00	0	2.3	9	-3.95
2016-05-06 16:00:00													0	0		-4.244		0.9		2016-09-28 10:00:00	0	2.2	8.3	-3.94
2016-05-06 17:00:00													0	0		-4.243		1		2016-09-29 10:00:00	9.3	0.4	0.3	-3.91
2016-05-06 18:00:00													0	0		-4.243		1		2016-09-30 10:00:00	0	1.7	6.5	-3.91
2016-05-06 19:00:00													0	0		-4.242		1		2016-10-01 10:00:00	4.1	1.3	3.2	-3.93
2016-05-06 20:00:00													0	0		-4.24		0.8		2016-10-02 10:00:00	14.5	0.9	3.9	-3.94
2016-05-06 21:00:00													0	0		-4.239		0.7		2016-10-03 10:00:00	8.5	1.8	8.6	-3.94
2016-05-06 22:00:00													0	0		-4.238		0		2016-10-04 10:00:00	0	1.6	7.3	-3.93
2016-05-06 23:00:00													0	0		-4.238		0		2016-10-05 10:00:00	0	1.9	10.2	-3.89
2016-05-07													0	0		-4.236		0		2016-10-06 10:00:00	0	1.6	5.4	-3.9
2016-05-07 01:00:00													0	0		-4.235		0		2016-10-07 10:00:00	0	1.3	4.1	-3.9
2016-05-07 02:00:00													0	0		-4.235		0		2016-10-08 10:00:00	0	1.5	6.8	-3.91
2016-05-07 03:00:00													0	0		-4.234		0		2016-10-09 10:00:00	0.8	1.5	8	-3.9
2016-05-07 04:00:00													0	0		-4.233		0		2016-10-10 10:00:00	0	1.4	6.9	-3.89
2016-05-07 05:00:00													0	0		-4.232		0		2016-10-11 10:00:00	0	0.8	1.6	-3.89
2016-05-07 06:00:00													0	0		-4.231		0		2016-10-12 10:00:00	0	0.6	0.5	-3.89
2016-05-07 07:00:00													0	86.04		-4.231		0.7		2016-10-13 10:00:00	0	0.7	1.7	-3.87
2016-05-07 08:00:00													0	216		-4.236		0.8		2016-10-14 10:00:00	3.8	1.1	4.3	-3.88
2016-05-07 09:00:00													0	216		-4.246		1		2016-10-15 10:00:00	9.9	0.5	1.7	-3.9
2016-05-07 10:00:00													0	216	1922	-4.255		1		2016-10-16 10:00:00	0	1.6	8.5	-3.9
2016-05-07 11:00:00													0	216		-4.265		1		2016-10-17 10:00:00	0.7	1.1	6	-3.91
2016-05-07 12:00:00													0	216		-4.275		1	-4.6	2016-10-18 10:00:00	8.2	0.5	1.7	-3.88
2016-05-07 13:00:00													0	216		-4.285		1		2016-10-19 10:00:00	18.3	1.2	7.1	-3.89
2016-05-07 14:00:00													0	216		-4.296		1		2016-10-20 10:00:00	0.9	0.5	0.6	-3.88
2016-05-07 15:00:00													0	216		-4.305		1		2016-10-21 10:00:00	0.4	1.1	6.9	-3.88
2016-05-07 16:00:00													0	108		-4.313		1		2016-10-22 10:00:00	0	1.1	5.8	-3.89
2016-05-07 17:00:00													0	0		-4.314		1		2016-10-23 10:00:00	0	1.1	7.4	-3.91
2016-05-07 18:00:00													0	0		-4.313		1		2016-10-24 10:00:00	0	0.5	0.7	-3.95
2016-05-07 19:00:00													0	0		-4.311		1		2016-10-25 10:00:00	0	0.3	0	-3.95
2016-05-07 20:00:00													0	0		-4.308		1		2016-10-26 10:00:00	0	0.7	2.6	-3.96
2016-05-07 21:00:00													0	0		-4.305		0.7		2016-10-27 10:00:00	0	0.8	2.9	-3.95
2016-05-07 22:00:00													0	0		-4.302		0		2016-10-28 10:00:00	0	0.4	0.9	-3.96
2016-05-07 23:00:00													0	0		-4.3		0		2016-10-29 10:00:00	0	1	7.9	-3.95
2016-05-08													0	0		-4.297		0		2016-10-30 10:00:00	0	0.5	2	-3.94
2016-05-08 01:00:00													0	0		-4.295		0		2016-10-31 10:00:00	0	1	8	-3.92
2016-05-08 02:00:00													0	0		-4.292		0		2016-11-01 10:00:00	0.5	0.4	0.7	-3.92
2016-05-08 03:00:00													0	0		-4.291		0		2016-11-02 10:00:00	1.6	0.8	5.6	-3.94
2016-05-08 04:00:00													0	0		-4.288		0		2016-11-03 10:00:00	1.5	0.6	3.2	-3.92
2016-05-08 05:00:00													0	0		-4.286		0		2016-11-04 10:00:00	3	0.4	2	-3.89
2016-05-08 06:00:00													0	0		-4.284		0		2016-11-05 10:00:00	3.8	0.5	3.6	-3.89
2016-05-08 07:00:00													0	0		-4.282		0.5		2016-11-06 10:00:00	11.4	0.4	2.4	-3.91
2016-05-08 08:00:00													0	0		-4.281		1		2016-11-07 10:00:00	0.8	0.2	1	-3.92
2016-05-08 09:00:00													0	0		-4.28		1		2016-11-08 10:00:00	2.4	0.3	1.4	-3.89
2016-05-08 10:00:00													0	0	0	-4.278		1		2016-11-09 10:00:00	3.4	0.2	0	-3.91
2016-05-08 11:00:00													0	0		-4.277		1		2016-11-10 10:00:00	18.7	0.3	0.6	-3.95
2016-05-08 12:00:00													0	0		-4.276		1	-4.9	2016-11-11 10:00:00	0	0.7	7.8	-3.92
2016-05-08 13:00:00													0	0		-4.275		1		2016-11-12 10:00:00	0.4	0.4	3	-3.96
2016-05-08 14:00:00													0	0		-4.274		1		2016-11-13 10:00:00	2.9	0.2	0.2	-3.96
2016-05-08 15:00:00													0	0		-4.273		1		2016-11-14 10:00:00	3.7	0.2	0	-3.91
2016-05-08 16:00:00													0	0		-4.272		1		2016-11-15 10:00:00	3.2	0.1	0	-3.87
2016-05-08 17:00:00													0	0		-4.271		1		2016-11-16 10:00:00	4.6	0.4	1.7	-3.85
2016-05-08 18:00:00													0	0		-4.271		1		2016-11-17 10:00:00	7.9	0.3	1.5	-3.84
2016-05-08 19:00:00													0	0		-4.27		1		2016-11-18 10:00:00	1	0.3	0.5	-3.87
2016-05-08 20:00:00													0	0		-4.269		1		2016-11-19 10:00:00	3.1	0.4	2.8	-3.87
2016-05-08 21:00:00													0	0		-4.268		0.7		2016-11-20 10:00:00	5.9	0.1	0	-3.85
2016-05-08 22:00:00													0	0		-4.267		0		2016-11-21 10:00:00	5	0.3	0	-3.85
2016-05-08 23:00:00													0	0		-4.266		0		2016-11-22 10:00:00	0	0.6	4	-3.92
2016-05-09													0	0		-4.265		0		2016-11-23 10:00:00	0.2	0.1	0	-3.93
2016-05-09 01:00:00													0	0		-4.265		0		2016-11-24 10:00:00	0	0.5	5.8	-3.92
2016-05-09 02:00:00													0	0		-4.263		0		2016-11-25 10:00:00	0	0.6	7.3	-3.92
2016-05-09 03:00:00													0	0		-4.263		0		2016-11-26 10:00:00	0	0.5	5.3	-3.92
2016-05-09 04:00:00													0	0		-4.262		0		2016-11-27 10:00:00	0	0.3	1	-3.94
2016-05-09 05:00:00													0	0		-4.261		0		2016-11-28 10:00:00	0	0.5	7	-3.96
2016-05-09 06:00:00													0	0		-4.26		0		2016-11-29 10:00:00	0	0.6	7	-3.94
2016-05-09 07:00:00													0	0		-4.259		0.5		2016-11-30 10:00:00	0	0.3	2.5	-3.94
2016-05-09 08:00:00													0	0		-4.258		1		2016-12-01 10:00:00	0	0.2	1.9	-3.93
2016-05-09 09:00:00													0	0		-4.257		1		2016-12-02 10:00:00	1.5	0.2	1.7	-3.94
2016-05-09 10:00:00													0	0	0	-4.256		1		2016-12-03 10:00:00	0	0.3	2.2	-3.94
2016-05-09 11:00:00													0	0		-4.255		1		2016-12-04 10:00:00	0	0.5	6.8	-3.94
2016-05-09 12:00:00													0	0		-4.255		1	-4.7	2016-12-05 10:00:00	0	0.4	6.5	-3.94
2016-05-09 13:00:00													0	0		-4.254		1		2016-12-06 10:00:00	0	0.4	6.8	-3.94
2016-05-09 14:00:00													0	0		-4.254		1		2016-12-07 10:00:00	0	0.2	0.7	-3.93
2016-05-09 15:00:00													0	0		-4.253		1		2016-12-08 10:00:00	1.5	0.2	0.3	-3.95
2016-05-09 16:00:00													0	0		-4.252		1		2016-12-09 10:00:00	0	0.1	0.5	-3.94
2016-05-09 17:00:00													0	0		-4.251		0.9		2016-12-10 10:00:00	5.4	0.1	0	-3.92
2016-05-09 18:00:00													0	0		-4.251		0.6		2016-12-11 10:00:00	3.6	0.3	1.9	-3.93
2016-05-09 19:00:00													0	0		-4.25		0.9		2016-12-12 10:00:00	0	0.2	0	-3.93
2016-05-09 20:00:00													0	0		-4.249		1		2016-12-13 10:00:00	0.7	0.1	0	-3.94
2016-05-09 21:00:00													0	0		-4.248		0.7		2016-12-14 10:00:00	0	0.2	0.2	-3.94
2016-05-09 22:00:00													0	0		-4.247		0		2016-12-15 10:00:00	0	0.1	0	-3.96
2016-05-09 23:00:00													0	0		-4.246		0		2016-12-16 10:00:00	0	0.3	2.3	-3.97
2016-05-10													0	0		-4.246		0		2016-12-17 10:00:00	0	0.1	0	-3.96
2016-05-10 01:00:00													0	0		-4.245		0		2016-12-18 10:00:00	0	0.2	1.6	-3.95
2016-05-10 02:00:00													0	0		-4.244		0		2016-12-19 10:00:00	0	0.4	5.4	-3.93
2016-05-10 03:00:00													0	0		-4.243		0		2016-12-20 10:00:00	0	0.3	5.8	-3.95
2016-05-10 04:00:00													0	0		-4.243		0		2016-12-21 10:00:00	1.8	0.2	0.3	-3.95
2016-05-10 05:00:00													0	0		-4.242		0		2016-12-22 10:00:00	0.5	0.2	1.6	-3.94
2016-05-10 06:00:00													0	0		-4.241		0		2016-12-23 10:00:00	0.4	0.2	1.1	-3.95
2016-05-10 07:00:00														0		-4.24		0		2016-12-24 10:00:00	0.3	0.2	1	-3.94
2016-05-10 08:00:00														0		-4.239		0		2016-12-25 10:00:00	0.3	0.1	0	-3.97
2016-05-10 09:00:00													0	0		-4.238		0		2016-12-26 10:00:00	0.2	0.4	5.1	-4.01
2016-05-10 10:00:00													0	0	6	-4.238		0		2016-12-27 10:00:00	1.3	0.4	6.2	-3.99
2016-05-10 11:00:00													0	3.78		-4.237		0		2016-12-28 10:00:00	0	0.2	0	-3.98
2016-05-10 12:00:00													0	0		-4.236		0.2	-2.2	2016-12-29 10:00:00	0	0.1	0	-3.98
2016-05-10 13:00:00													0	0		-4.236		0		2016-12-30 10:00:00	0	0.1	0.2	-3.95
2016-05-10 14:00:00													0	1.8		-4.236		0.1		2016-12-31 10:00:00	0.1	0.1	0	-3.92
2016-05-10 15:00:00													0	0		-4.236		0		2017-01-01 10:00:00	0.6	0.1	0	-3.96
2016-05-10 16:00:00													0	0		-4.237		0		2017-01-02 10:00:00	1.7	0.3	4.6	-3.93
2016-05-10 17:00:00													0	0		-4.238		0.1		2017-01-03 10:00:00	0.7	0.2	0.7	-3.92
2016-05-10 18:00:00													0	0		-4.238		0		2017-01-04 10:00:00	0.6	0.3	2.8	-4
2016-05-10 19:00:00													0	0		-4.238		0		2017-01-05 10:00:00	0	0.4	6.2	-3.99
2016-05-10 20:00:00			2.35											0		-4.239		0		2017-01-06 10:00:00	0	0.4	6.3	-3.96
2016-05-10 21:00:00			2.52											0		-4.239		0		2017-01-07 10:00:00	1.2	0.1	0	-3.97
2016-05-10 22:00:00			2.47											0		-4.239		0		2017-01-08 10:00:00	0	0.2	0.2	-3.93
2016-05-10 23:00:00			2.44											0		-4.239		0		2017-01-09 10:00:00	6.1	0.1	0	-3.91
2016-05-11			2.34							0.416			0	0		-4.239		0		2017-01-10 10:00:00	1.9	0.3	2.3	-3.9
2016-05-11 01:00:00			2.26										0	0		-4.239		0		2017-01-11 10:00:00	0.5	0.4	2.9	-3.92
2016-05-11 02:00:00			2.27										0	0		-4.239		0		2017-01-12 10:00:00	16.1	0.3	1.5	-3.88
2016-05-11 03:00:00			2.29										0	0		-4.239		0		2017-01-13 10:00:00	9.7	0.3	2	-3.92
2016-05-11 04:00:00			2.28											0		-4.239		0		2017-01-14 10:00:00	6.8	0.2	2.7	-3.93
2016-05-11 05:00:00			2.25											0		-4.239		0		2017-01-15 10:00:00	0	0.3	1.6	-3.96
2016-05-11 06:00:00			2.28										0	0		-4.239		0		2017-01-16 10:00:00	0	0.5	6.8	-3.98
2016-05-11 07:00:00			2.33										0	0		-4.24		0.3		2017-01-17 10:00:00	0	0.4	3.7	-3.98
2016-05-11 08:00:00			2.3										0	0		-4.24		0.3		2017-01-18 10:00:00	0.1	0.2	1.7	-3.98
2016-05-11 09:00:00			2.28										0	0		-4.24		0.1		2017-01-19 10:00:00	0	0.5	7.3	-3.97
2016-05-11 10:00:00			2.36		1231		146				2.08	1.25	0	0	0	-4.239		0		2017-01-20 10:00:00	0	0.5	7	-3.95
2016-05-11 11:00:00			2.35										0	0		-4.24		0.5		2017-01-21 10:00:00	0	0.5	7.5	-3.95
2016-05-11 12:00:00			2.38										0	0		-4.24		1	-3.8	2017-01-22 10:00:00	0	0.5	7.5	-3.97
2016-05-11 13:00:00			2.41										0	0		-4.24		1		2017-01-23 10:00:00	0	0.2	0.5	-3.98
2016-05-11 14:00:00			2.52										0	0		-4.24		1		2017-01-24 10:00:00	0.4	0.3	2.1	-3.99
2016-05-11 15:00:00			2.64										0	0		-4.24		0.8		2017-01-25 10:00:00	0	0.2	0	-3.96
2016-05-11 16:00:00			2.75										0	0		-4.24		1		2017-01-26 10:00:00	0	0.5	7.3	-3.94
2016-05-11 17:00:00			2.87										0	0		-4.24		0.4		2017-01-27 10:00:00	0	0.4	5	-3.95
2016-05-11 18:00:00			2.9										0	0		-4.241		0.2		2017-01-28 10:00:00	0	0.4	2.7	-3.96
2016-05-11 19:00:00			2.95										0	0		-4.241		0.6		2017-01-29 10:00:00	0.3	0.3	1.3	-3.96
2016-05-11 20:00:00			2.73										0	0		-4.241		1		2017-01-30 10:00:00	6.7	0.2	0.2	-3.97
2016-05-11 21:00:00			2.62										0	0		-4.241		0.8		2017-01-31 10:00:00	0	0.2	0.3	-3.97
2016-05-11 22:00:00			2.55										0	0		-4.241		0		2017-02-01 10:00:00	0.7	0.2	0	-3.91
2016-05-11 23:00:00			2.54										0	0		-4.241		0		2017-02-02 10:00:00	0.2	0.6	2.8	-3.92
2016-05-12			2.52										0	0		-4.241		0		2017-02-03 10:00:00	0.5	0.4	1.7	-3.93
2016-05-12 01:00:00			2.52										0	0		-4.241		0		2017-02-04 10:00:00	9.1	0.3	0.8	-3.92
2016-05-12 02:00:00			2.54										0	0		-4.241		0		2017-02-05 10:00:00	0.8	0.3	0.3	-3.95
2016-05-12 03:00:00			2.5										0	0		-4.241		0		2017-02-06 10:00:00	0	0.2	0	-3.96
2016-05-12 04:00:00			2.47										0	0		-4.241		0		2017-02-07 10:00:00	0.8	0.2	0	-3.99
2016-05-12 05:00:00			2.5										0	0		-4.241		0		2017-02-08 10:00:00	0.2	0.1	0	-3.97
2016-05-12 06:00:00			2.49										0	0		-4.241		0		2017-02-09 10:00:00	0	0.1	0	-3.94
2016-05-12 07:00:00			2.45										0	0		-4.242		0.7		2017-02-10 10:00:00	0.1	0.1	0	-3.94
2016-05-12 08:00:00			2.34										0	0		-4.242		0.8		2017-02-11 10:00:00	4.2	0.2	0.1	-3.94
2016-05-12 09:00:00			2.32										0	0		-4.242		1		2017-02-12 10:00:00	2.6	0.6	4	-3.96
2016-05-12 10:00:00			2.41										0	0	0	-4.242		1		2017-02-13 10:00:00	0	0.9	8.7	-3.97
2016-05-12 11:00:00			2.45										0	0		-4.242		1		2017-02-14 10:00:00	0	1	8.7	-3.96
2016-05-12 12:00:00			2.48										0	0		-4.242		1	-4.6	2017-02-15 10:00:00	0.2	1	8.1	-3.97
2016-05-12 13:00:00			2.52										0	0		-4.242		1		2017-02-16 10:00:00	0	0.6	2.6	-3.96
2016-05-12 14:00:00			2.61										0	0		-4.242		1		2017-02-17 10:00:00	0.1	0.3	0	-3.98
2016-05-12 15:00:00			2.71										0	0		-4.243		1		2017-02-18 10:00:00	0	0.6	2.7	-3.97
2016-05-12 16:00:00			2.84										0	0		-4.243		0.9		2017-02-19 10:00:00	0.3	0.7	3.6	-3.93
2016-05-12 17:00:00			2.95										0	0		-4.243		0.9		2017-02-20 10:00:00	2.4	0.3	0.7	-3.94
2016-05-12 18:00:00			3.04										0	0		-4.243		1		2017-02-21 10:00:00	1.1	1.2	6.9	-3.92
2016-05-12 19:00:00			3.09										0	0		-4.243		1		2017-02-22 10:00:00	14.3	0.3	0	-3.82
2016-05-12 20:00:00			3.08										0	0		-4.243		1		2017-02-23 10:00:00	9.6	0.3	0.6	-3.93
2016-05-12 21:00:00			3.02										0	0		-4.244		0.8		2017-02-24 10:00:00	0.4	1.1	7.2	-3.91
2016-05-12 22:00:00			2.91										0	0		-4.244		0		2017-02-25 10:00:00	1.4	0.4	0.3	-3.89
2016-05-12 23:00:00			2.84										0	0		-4.244		0		2017-02-26 10:00:00	1.6	0.3	0	-3.88
2016-05-13			2.77										0	0		-4.243		0		2017-02-27 10:00:00	6.7	0.2	0.2	-3.86
2016-05-13 01:00:00			2.79										0	0		-4.244		0		2017-02-28 10:00:00	3.3	0.7	2.7	-3.89
2016-05-13 02:00:00			2.81										0	0		-4.244		0		2017-03-01 10:00:00	3.2	0.8	3.4	-3.92
2016-05-13 03:00:00			2.83										0	0		-4.243		0		2017-03-02 10:00:00	4.8	0.7	2.4	-3.92
2016-05-13 04:00:00			2.85										0	0		-4.244		0		2017-03-03 10:00:00	0.1	0.6	1.6	-3.85
2016-05-13 05:00:00			2.84										0	0		-4.244		0		2017-03-04 10:00:00	3.2	0.6	1	-3.87
2016-05-13 06:00:00			2.83										0	0		-4.244		0		2017-03-05 10:00:00	3.6	1	4.4	-3.89
2016-05-13 07:00:00			2.87										0	0		-4.244		0		2017-03-06 10:00:00	2.5	1.1	4.4	-3.95
2016-05-13 08:00:00			2.78										0	0		-4.244		0.2		2017-03-07 10:00:00	0	0.7	1.5	-3.92
2016-05-13 09:00:00			2.66										0	0		-4.244		1		2017-03-08 10:00:00	13.7	0.2	0	-3.91
2016-05-13 10:00:00			2.71										0	0	0	-4.244		1		2017-03-09 10:00:00	0.2	1.2	5.4	-3.94
2016-05-13 11:00:00			2.73										0	0		-4.244		1		2017-03-10 10:00:00	0	1.6	8.1	-3.92
2016-05-13 12:00:00			2.82										0	0		-4.244		1	-4.4	2017-03-11 10:00:00	0	1	3.1	-3.91
2016-05-13 13:00:00			2.78										0	0		-4.245		1		2017-03-12 10:00:00	0	1.8	9.7	-3.95
2016-05-13 14:00:00			2.82										0	0		-4.245		1		2017-03-13 10:00:00	0	1.5	8.8	-3.97
2016-05-13 15:00:00			2.91										0	0		-4.246		1		2017-03-14 10:00:00	0	1.3	4.2	-3.96
2016-05-13 16:00:00			3.07										0	0		-4.246		1		2017-03-15 10:00:00	0	2	10	-3.91
2016-05-13 17:00:00			3.18										0	0		-4.246		1		2017-03-16 10:00:00	0	2	10.7	-3.91
2016-05-13 18:00:00			3.26										0	0		-4.246		1		2017-03-17 10:00:00	2.9	1.3	4.3	-3.9
2016-05-13 19:00:00			3.28										0	0		-4.246		1		2017-03-18 10:00:00	5.8	0.4	0.3	-3.89
2016-05-13 20:00:00			3.13										0	0		-4.247		1		2017-03-19 10:00:00	1	1.4	4.5	-3.89
2016-05-13 21:00:00			3.11										0	0		-4.247		0.5		2017-03-20 10:00:00	3.3	0.3	0.2	-3.92
2016-05-13 22:00:00			3.18										0	0		-4.247		0		2017-03-21 10:00:00	0	2	10.1	-3.93
2016-05-13 23:00:00			3.19										0	0		-4.247		0		2017-03-22 10:00:00	0	1.9	8	-3.95
2016-05-14			3.14										0	0		-4.247		0		2017-03-23 10:00:00	0	2.2	10.3	-3.98
2016-05-14 01:00:00			3.08										0	0		-4.247		0		2017-03-24 10:00:00	0	2.3	10.7	-3.97
2016-05-14 02:00:00			3.04										0	0		-4.247		0		2017-03-25 10:00:00	0	2.4	10.8	-3.95
2016-05-14 03:00:00			3.04										0	0		-4.247		0		2017-03-26 10:00:00	0	2.1	9.6	-3.96
2016-05-14 04:00:00			3										0	0		-4.247		0		2017-03-27 10:00:00	0	2.6	11.5	-3.94
2016-05-14 05:00:00			3.05										0	0		-4.247		0		2017-03-28 10:00:00	0	2.6	11.7	-3.95
2016-05-14 06:00:00			3.09										0	0		-4.247		0		2017-03-29 10:00:00	0.1	1.1	0.9	-3.94
2016-05-14 07:00:00			3.05										0	0		-4.247		0		2017-03-30 10:00:00	0	2.5	8	-3.92
2016-05-14 08:00:00			3.06											0		-4.247		0.3		2017-03-31 10:00:00	0	2	5.8	-3.92
2016-05-14 09:00:00			3.1										0.1	0		-4.247		0.5		2017-04-01 10:00:00	0.1	0.9	0.2	-3.98
2016-05-14 10:00:00			3.13											0	0	-4.247		0.7		2017-04-02 10:00:00	0	2.8	12	-3.96
2016-05-14 11:00:00			3.13										0.1	0		-4.247		0.3		2017-04-03 10:00:00	0	1.4	4	-3.96
2016-05-14 12:00:00			3.14											0		-4.247		0.5	-1.6	2017-04-04 10:00:00	0	2.3	8.5	-3.96
2016-05-14 13:00:00			3.29											0		-4.247		0.4		2017-04-05 10:00:00	0	2.2	8.2	-3.96
2016-05-14 14:00:00			3.43											0		-4.247		0.8		2017-04-06 10:00:00	0	1.5	3.8	-3.94
2016-05-14 15:00:00			3.47											0		-4.247		0.7		2017-04-07 10:00:00	0	2.7	7.9	-3.94
2016-05-14 16:00:00			3.52										0	0		-4.247		0.9		2017-04-08 10:00:00	0	2.2	6.5	-3.9
2016-05-14 17:00:00			3.55										0	0		-4.247		0.5		2017-04-09 10:00:00	0	3.2	12.3	-3.92
2016-05-14 18:00:00			3.66										0	0		-4.247		0.4		2017-04-10 10:00:00	0	1.9	6.2	-3.91
2016-05-14 19:00:00			3.76										0	0		-4.247		0.9		2017-04-11 10:00:00	0	2.7	10.3	-3.88
2016-05-14 20:00:00			3.64										0					0.2		2017-04-12 10:00:00	0.6	1	0.9	-3.88
2016-05-14 21:00:00			3.73										0.3	0		-4.247		0.3		2017-04-13 10:00:00	0	2.1	6.6	-3.88
2016-05-14 22:00:00			3.67										0.5	0		-4.247		0		2017-04-14 10:00:00	0.3	1.7	4.8	-3.88
2016-05-14 23:00:00			3.67										0.1	0		-4.247		0		2017-04-15 10:00:00	3.3	1.9	4.5	-3.89
2016-05-15			3.61											0		-4.247		0		2017-04-16 10:00:00	5	1.4	2.9	-3.88
2016-05-15 01:00:00			3.59										0	0		-4.247		0		2017-04-17 10:00:00	6.3	2.5	9.9	-3.89
2016-05-15 02:00:00			3.57											0		-4.247		0		2017-04-18 10:00:00	2.7	2.3	10.2	-3.91
2016-05-15 03:00:00			3.54											0		-4.247		0		2017-04-19 10:00:00	0	2.2	7.9	-3.91
2016-05-15 04:00:00			3.57										0.3	0		-4.246		0		2017-04-20 10:00:00	0	2.9	11.5	-3.89
2016-05-15 05:00:00			3.53											0		-4.246		0		2017-04-21 10:00:00	1	1.4	0.3	-3.88
2016-05-15 06:00:00			3.6										0	0		-4.246		0		2017-04-22 10:00:00	1.2	2.2	6.8	-3.87
2016-05-15 07:00:00			3.7										0	0		-4.246		0		2017-04-23 10:00:00	0.9	2.2	6.8	-3.85
2016-05-15 08:00:00			3.86											0		-4.246		0.7		2017-04-24 10:00:00	2.2	1.3	1.9	-3.86
2016-05-15 09:00:00			3.84											0		-4.246		0.7		2017-04-25 10:00:00	1.6	2.2	7.6	-3.87
2016-05-15 10:00:00			3.58										0	0	0	-4.246		0.4		2017-04-26 10:00:00	1.6	2.3	8	-3.87
2016-05-15 11:00:00			3.53										0	0		-4.246		0.3		2017-04-27 10:00:00	0.2	2.2	7.5	-3.87
2016-05-15 12:00:00			3.56										0.1	0		-4.246		0.6	-1.8	2017-04-28 10:00:00	5	2.4	7.9	-3.87
2016-05-15 13:00:00			3.56											0		-4.246		0.6		2017-04-29 10:00:00	0	2.2	6.7	-3.83
2016-05-15 14:00:00			3.62										0.1	0		-4.246		0.3		2017-04-30 10:00:00	0	3.7	11.5	-3.88
2016-05-15 15:00:00			3.69										0.1	0		-4.246		0.3		2017-05-01 10:00:00	0.4	1.5	0.7	-3.88
2016-05-15 16:00:00			3.78											0		-4.246		0.4		2017-05-02 10:00:00	1.4	2	4.4	-3.88
2016-05-15 17:00:00			3.88											0		-4.246		0.5		2017-05-03 10:00:00	3.6	1.4	2.4	-3.87
2016-05-15 18:00:00			3.95										0	0		-4.246		0.7		2017-05-04 10:00:00	0	2.3	3.4	-3.87
2016-05-15 19:00:00			3.98											0		-4.246		0.7		2017-05-05 10:00:00	0.1	1	0	-3.85
2016-05-15 20:00:00			3.82										0	0		-4.246		0		2017-05-06 10:00:00	0	3.9	12.7	-3.86
2016-05-15 21:00:00			3.85										0	0		-4.246		0.7		2017-05-07 10:00:00	0	2.5	5.3	-3.9
2016-05-15 22:00:00			3.9										0	0		-4.246		0		2017-05-08 10:00:00	0	2.5	7.7	-3.86
2016-05-15 23:00:00			3.89										0	0		-4.246		0		2017-05-09 10:00:00	0	2.9	9.9	-3.85
2016-05-16			3.85											0		-4.246		0		2017-05-10 10:00:00	0	2.6	6.9	-3.82
2016-05-16 01:00:00			3.85											0		-4.246		0		2017-05-11 10:00:00	0	4	12.1	-3.85
2016-05-16 02:00:00			3.85										0	0		-4.246		0		2017-05-12 10:00:00	8.9	1.9	2.6	-3.89
2016-05-16 03:00:00			3.9										0	0		-4.246		0		2017-05-13 10:00:00	2.5	1.7	1.7	-3.91
2016-05-16 04:00:00			3.9											0		-4.245		0		2017-05-14 10:00:00	2.5	3.3	9.9	-3.92
2016-05-16 05:00:00			3.9											0		-4.244		0		2017-05-15 10:00:00	0.3	3.5	8.7	-3.89
2016-05-16 06:00:00			3.86										0.1	0		-4.243		0		2017-05-16 10:00:00	0	3.2	3.3	-3.86
2016-05-16 07:00:00			3.6											0		-4.243		0.8		2017-05-17 10:00:00	0	4.4	8.7	-3.84
2016-05-16 08:00:00			3.49											0		-4.243		0.2		2017-05-18 10:00:00	1.2	2.1	3.2	-3.84
2016-05-16 09:00:00			3.59										0	0		-4.243		0.3		2017-05-19 10:00:00	4.6	1.3	2	-3.88
2016-05-16 10:00:00			3.76										0.3	0	0	-4.243		0.3		2017-05-20 10:00:00	0	3.3	11.4	-3.9
2016-05-16 11:00:00			3.8										0.2	0		-4.243		0.1		2017-05-21 10:00:00	0	3.4	9.7	-3.86
2016-05-16 12:00:00			3.79										0	0		-4.242		0.6	-1.8	2017-05-22 10:00:00	0	4.5	12	-3.87
2016-05-16 13:00:00			3.82											0		-4.243		0		2017-05-23 10:00:00	0	4.3	12	-3.9
2016-05-16 14:00:00			3.9										0	0		-4.243		0.2		2017-05-24 10:00:00	0	3.9	9.1	-3.9
2016-05-16 15:00:00			3.94										0	0		-4.242		0.2		2017-05-25 10:00:00	0	4.9	14.7	-3.9
2016-05-16 16:00:00			4.02										0	0		-4.242		0.4		2017-05-26 10:00:00	0	5.3	14.8	-3.88
2016-05-16 17:00:00			4.09										0	0		-4.243		0.9		2017-05-27 10:00:00	0	5.2	13.8	-3.86
2016-05-16 18:00:00			4.17										0	0		-4.242		0.3		2017-05-28 10:00:00	0	4.7	13	-3.86
2016-05-16 19:00:00			4.22										0	0		-4.242		0		2017-05-29 10:00:00	7	4.4	10.1	-3.87
2016-05-16 20:00:00			4.09										0	0		-4.242		0.2		2017-05-30 10:00:00	0.2	1.7	1.7	-3.9
2016-05-16 21:00:00			4.13										0	0		-4.242		0.7		2017-05-31 10:00:00	0	4.6	13.5	-3.9
2016-05-16 22:00:00			4.1										0	0		-4.242		0		2017-06-01 10:00:00	0	4.9	14.9	-3.89
2016-05-16 23:00:00			4.12										0	0		-4.242		0		2017-06-02 10:00:00	0	4.5	11.7	-3.89
2016-05-17			4.1										0	0		-4.241		0		2017-06-03 10:00:00	2.4	3.5	8.1	-3.91
2016-05-17 01:00:00			4.04										0	0		-4.241		0		2017-06-04 10:00:00	0	4.5	12.9	-3.89
2016-05-17 02:00:00			4.06										0	0		-4.24		0		2017-06-05 10:00:00	0	3.5	7.6	-3.87
2016-05-17 03:00:00			3.99										0	0		-4.24		0		2017-06-06 10:00:00	8.5	1.6	2	-3.92
2016-05-17 04:00:00			3.95										0	0		-4.239		0		2017-06-07 10:00:00	2.2	1.7	3.7	-3.92
2016-05-17 05:00:00			3.89										0	0		-4.239		0		2017-06-08 10:00:00	1.8	3	4.9	-3.9
2016-05-17 06:00:00			3.87										0	0		-4.238		0		2017-06-09 10:00:00	14	2.9	7.4	-3.9
2016-05-17 07:00:00			3.92										0	0		-4.238		0		2017-06-10 10:00:00	0	4	10.3	-3.88
2016-05-17 08:00:00			3.95										0	0		-4.237		0		2017-06-11 10:00:00	0	4.5	9.3	-3.89
2016-05-17 09:00:00			3.95										0	0		-4.237		0.1		2017-06-12 10:00:00	0	2.7	4	-3.91
2016-05-17 10:00:00			3.93										0	0	0	-4.236		0.3		2017-06-13 10:00:00	0	4.7	13	-3.9
2016-05-17 11:00:00			3.85										0	0		-4.236		0.9		2017-06-14 10:00:00	0	5.2	14.9	-3.89
2016-05-17 12:00:00			3.95										0	0		-4.235		0.5	-3.3	2017-06-15 10:00:00	0	4.6	10.7	-3.94
2016-05-17 13:00:00			3.96										0	0		-4.235		0.4		2017-06-16 10:00:00	0	2.8	5.8
2016-05-17 14:00:00			4.11										0	0		-4.235		0.5		2017-06-17 10:00:00	0	3.8	7.8
2016-05-17 15:00:00			4.37										0	0		-4.235		0.6		2017-06-18 10:00:00	0	5.5	15.2
2016-05-17 16:00:00			4.43										0	0		-4.235		0.6		2017-06-19 10:00:00	0	5.4	14.3
2016-05-17 17:00:00			4.5										0	0		-4.235		0.3		2017-06-20 10:00:00	0	4.4	9.9
2016-05-17 18:00:00			4.53										0	0		-4.235		1		2017-06-21 10:00:00	0	4.9	13.1
2016-05-17 19:00:00			4.56										0	0		-4.235		1		2017-06-22 10:00:00	6.8
2016-05-17 20:00:00			4.41										0	0		-4.235		1		2017-06-23 10:00:00	0.1
2016-05-17 21:00:00			4.49										0	0		-4.235		0.8		2017-06-24 10:00:00	1.7
2016-05-17 22:00:00			4.5										0	0		-4.235		0		2017-06-25 10:00:00	4.1
2016-05-17 23:00:00			4.44										0	0		-4.235		0		2017-06-26 10:00:00	0
2016-05-18			4.28										0	0		-4.235		0		2017-06-27 10:00:00	0.1
2016-05-18 01:00:00			4.13										0	0		-4.235		0		2017-06-28 10:00:00	2.7
2016-05-18 02:00:00			3.94										0	0		-4.235		0		2017-06-29 10:00:00	0.6
2016-05-18 03:00:00			3.91										0	0		-4.235		0		2017-06-30 10:00:00	3.9
2016-05-18 04:00:00			3.81										0	0		-4.235		0		2017-07-01 10:00:00	6.3
2016-05-18 05:00:00			3.67										0	0		-4.235		0
2016-05-18 06:00:00			3.62										0	0		-4.235		0
2016-05-18 07:00:00			3.58										0	0		-4.235		0.5
2016-05-18 08:00:00			3.43										0	0		-4.235		0
2016-05-18 09:00:00			3.42										0	0		-4.235		0
2016-05-18 10:00:00			3.65										0	0	0	-4.235		0.2
2016-05-18 11:00:00			3.72										0	0		-4.235		0.3
2016-05-18 12:00:00			3.7										0	0		-4.235		0.2	3.3
2016-05-18 13:00:00			3.75										0	0		-4.235		0.1
2016-05-18 14:00:00			3.85										0	0		-4.235		0
2016-05-18 15:00:00			4										0	0		-4.235		0.1
2016-05-18 16:00:00			3.89										0.1	0		-4.235		0
2016-05-18 17:00:00			3.84											0		-4.235		0
2016-05-18 18:00:00			3.89										0	0		-4.234		0.1
2016-05-18 19:00:00			4.07										0	0		-4.234		0.5
2016-05-18 20:00:00			3.95										5.1	0		-4.232		0
2016-05-18 21:00:00			3.94											0		-4.218		0.8
2016-05-18 22:00:00			4.03											0		-4.212		0
2016-05-18 23:00:00			4.4										0	0		-4.21		0
2016-05-19			4.4										0	196.2		-4.213		0
2016-05-19 01:00:00			4.5										0	216		-4.221		0
2016-05-19 02:00:00			4.57										0	216		-4.231		0
2016-05-19 03:00:00			4.59										0	216		-4.241		0
2016-05-19 04:00:00			4.5										0	216		-4.251		0
2016-05-19 05:00:00			4.6										0	216		-4.26		0
2016-05-19 06:00:00			4.62										0	216		-4.27		0
2016-05-19 07:00:00			4.66										0	216		-4.28		0
2016-05-19 08:00:00			4.67										0	14.94		-4.285		0
2016-05-19 09:00:00			4.66										0	0		-4.285		0
2016-05-19 10:00:00			4.4										0	0	1723	-4.284		0
2016-05-19 11:00:00			4.05										0	0		-4.282		0
2016-05-19 12:00:00			4.01										0	0		-4.28		0	-2.3
2016-05-19 13:00:00			3.99										0	0		-4.278		0.2
2016-05-19 14:00:00			3.97										0	0		-4.277		0.2
2016-05-19 15:00:00			4.09										0	0		-4.275		0.8
2016-05-19 16:00:00			4.32										0	0		-4.274		0.3
2016-05-19 17:00:00			4.48										0	0		-4.273		0.7
2016-05-19 18:00:00			4.56										0	0		-4.271		0.3
2016-05-19 19:00:00			4.64										0	0		-4.27		0.4
2016-05-19 20:00:00			4.42										0	0		-4.269		0.2
2016-05-19 21:00:00			4.47										0	0		-4.269		0.5
2016-05-19 22:00:00			4.37										0	0		-4.268		0
2016-05-19 23:00:00			4.23										0	0		-4.267		0
2016-05-20			4.11							0.636			0	0		-4.266		0
2016-05-20 01:00:00			3.99										0	0		-4.265		0
2016-05-20 02:00:00			3.95										0	0		-4.265		0
2016-05-20 03:00:00			3.96										0	0		-4.264		0
2016-05-20 04:00:00			3.87										0.2	0		-4.264		0
2016-05-20 05:00:00			3.87										0.2	0		-4.263		0
2016-05-20 06:00:00			3.88										0.1	0		-4.262		0
2016-05-20 07:00:00			3.66										0.4	0		-4.262		0
2016-05-20 08:00:00			3.29										0.1	0		-4.261		0
2016-05-20 09:00:00			3.36										0	0		-4.259		0
2016-05-20 10:00:00			3.93		1306		164				1.95	1.58	0.1	0	0	-4.259		0
2016-05-20 11:00:00			3.99										0.1	0		-4.258		0
2016-05-20 12:00:00			4.07										0	0		-4.258		0	-0.6
2016-05-20 13:00:00			4.11										0	0		-4.257		0
2016-05-20 14:00:00			4.18										0	0		-4.256		0.1
2016-05-20 15:00:00			4.27										0	0		-4.255		0.1
2016-05-20 16:00:00			4.42										0	0		-4.254		0.3
2016-05-20 17:00:00			4.51										0	0		-4.254		0.1
2016-05-20 18:00:00			4.57										0	0		-4.253		0.7
2016-05-20 19:00:00			4.62										0	0		-4.252		0.3
2016-05-20 20:00:00			4.67										0	0		-4.251		0
2016-05-20 21:00:00			4.77										0	0		-4.251		0.7
2016-05-20 22:00:00			4.79										0	0		-4.25		0
2016-05-20 23:00:00			4.71										0	0		-4.249		0
2016-05-21			4.62										0	0		-4.249		0
2016-05-21 01:00:00			4.57										0	0		-4.248		0
2016-05-21 02:00:00			4.6										0	0		-4.247		0
2016-05-21 03:00:00			4.62										0	0		-4.246		0
2016-05-21 04:00:00			4.64										0	0		-4.246		0
2016-05-21 05:00:00			4.63										0	0		-4.245		0
2016-05-21 06:00:00			4.51										0	0		-4.244		0
2016-05-21 07:00:00			4.62										0	0		-4.244		0
2016-05-21 08:00:00			4.66										0	0		-4.243		0
2016-05-21 09:00:00			4.53										0	0		-4.242		0.2
2016-05-21 10:00:00			4.36										0	0	0	-4.242		0.1
2016-05-21 11:00:00			4.36										0	0		-4.241		0
2016-05-21 12:00:00			4.33										0	0		-4.24		0.1	-2.7
2016-05-21 13:00:00			4.32										0	0		-4.24		0.2
2016-05-21 14:00:00			4.4										0	0		-4.239		0.3
2016-05-21 15:00:00			4.39										0	0		-4.239		0.4
2016-05-21 16:00:00			4.46										0	0		-4.238		0.3
2016-05-21 17:00:00			4.49										0	0		-4.237		0.4
2016-05-21 18:00:00			4.52										0	0		-4.237		0.3
2016-05-21 19:00:00			4.59										0	0		-4.236		0
2016-05-21 20:00:00			4.62										0	0		-4.236		0
2016-05-21 21:00:00			4.75										0	0		-4.235		0.2
2016-05-21 22:00:00			4.68										0	0		-4.235		0
2016-05-21 23:00:00			4.51										0	0		-4.234		0
2016-05-22			4.33										0	0		-4.233		0
2016-05-22 01:00:00			4.28										0	0		-4.232		0
2016-05-22 02:00:00			4.25										0	0		-4.232		0
2016-05-22 03:00:00			4.3										0	0		-4.231		0
2016-05-22 04:00:00			4.5											0		-4.231		0
2016-05-22 05:00:00			4.22										0.1	114.9		-4.231		0
2016-05-22 06:00:00			4.14											216		-4.235		0
2016-05-22 07:00:00			4.21										5.3	216		-4.241		0
2016-05-22 08:00:00			4.6										0.4	216		-4.223		0
2016-05-22 09:00:00			4.65										0.3	216		-4.219		0
2016-05-22 10:00:00			4.56										0.2	216	4003	-4.221		0
2016-05-22 11:00:00			4.6										0.4	216		-4.226		0
2016-05-22 12:00:00			4.56										0	216		-4.232		0	11.4
2016-05-22 13:00:00			4.55										0	216		-4.239		0
2016-05-22 14:00:00			4.57											216		-4.246		0
2016-05-22 15:00:00			4.61											216		-4.252		0
2016-05-22 16:00:00			4.68										0.4	216		-4.259		0
2016-05-22 17:00:00			4.65										0.6	216		-4.265		0
2016-05-22 18:00:00			4.67										0.3	216		-4.27		0
2016-05-22 19:00:00			4.67											216		-4.276		0
2016-05-22 20:00:00			4.62											216		-4.282		0
2016-05-22 21:00:00			4.71										0.2	216		-4.288		0
2016-05-22 22:00:00			4.79											216		-4.294		0
2016-05-22 23:00:00			4.76										0.1	216		-4.3		0
2016-05-23			4.78										1.6	216		-4.305		0
2016-05-23 01:00:00			4.79										2.4	216		-4.306		0
2016-05-23 02:00:00			4.79										0.9	216		-4.306		0
2016-05-23 03:00:00			4.82										0.4	216		-4.305		0
2016-05-23 04:00:00			4.77										0.3	216		-4.307		0
2016-05-23 05:00:00			4.77										0.6	176.4		-4.31		0
2016-05-23 06:00:00			4.74										0.2	0		-4.307		0
2016-05-23 07:00:00			4.65										0.4	0		-4.303		0
2016-05-23 08:00:00			4.35										0.8	0		-4.296		0
2016-05-23 09:00:00			4.16										2.2	0		-4.289		0
2016-05-23 10:00:00			4.34										1.6	0	1256	-4.28		0
2016-05-23 11:00:00			4.37										0.8	0		-4.269		0
2016-05-23 12:00:00			4.39										0.2	0		-4.262		0	7.8
2016-05-23 13:00:00			4.66										0.2	0		-4.259		0
2016-05-23 14:00:00		0.45	4.71										0.1	0		-4.256		0
2016-05-23 15:00:00		0.64	4.8											0		-4.255		0
2016-05-23 16:00:00		0.57	4.85	18										0		-4.253		0
2016-05-23 17:00:00		0.57	4.77	17									0.2	0		-4.252		0
2016-05-23 18:00:00		0.51	4.66	18									0.1	0		-4.251		0
2016-05-23 19:00:00		0.49	4.66	16										0		-4.25		0
2016-05-23 20:00:00		0.49	4.59	15									0.1	0		-4.249		0
2016-05-23 21:00:00		0.48	4.6	15										0		-4.248		0
2016-05-23 22:00:00		0.46	4.47	15										0		-4.247		0
2016-05-23 23:00:00		0.45	4.42	14									0	0		-4.246		0
2016-05-24		0.45	4.38	14									0	0		-4.245		0
2016-05-24 01:00:00		0.45	4.53	14									0	0		-4.244		0
2016-05-24 02:00:00		0.45	4.26	14									0	0		-4.243		0
2016-05-24 03:00:00		0.46	4.02	15									0	0		-4.243		0
2016-05-24 04:00:00		0.44	3.99	15									0	0		-4.242		0
2016-05-24 05:00:00		0.45	3.93	15									0	0		-4.241		0
2016-05-24 06:00:00		0.46	3.88	15									0	0		-4.24		0
2016-05-24 07:00:00		0.46	3.9	16									0	0		-4.239		0
2016-05-24 08:00:00		0.46	4.01	16									0	0		-4.239		0
2016-05-24 09:00:00		0.45	4.01	17									0	0		-4.238		0.1
2016-05-24 10:00:00		0.45	3.95	16									0	0	0	-4.238		0
2016-05-24 11:00:00		0.46	3.87	17									0	0		-4.236		0.4
2016-05-24 12:00:00		0.46	3.93	18									0	0		-4.236		0.6	-2.4
2016-05-24 13:00:00		0.48	4.03	18									0	0		-4.235		0.6
2016-05-24 14:00:00		0.53	4.1	18									0	0		-4.235		0.4
2016-05-24 15:00:00		0.54	4.23	17									0	0		-4.234		0.4
2016-05-24 16:00:00		0.54	4.4	17									0	0		-4.234		0.1
2016-05-24 17:00:00		0.55	4.45	16									0	0		-4.233		0
2016-05-24 18:00:00		0.52	4.53	15									0	0		-4.232		0
2016-05-24 19:00:00		0.51	4.44	15									0	0		-4.231		0
2016-05-24 20:00:00		0.54	4.34	15									0	0		-4.23		0
2016-05-24 21:00:00		0.54	4.27	15									0	0		-4.23		0
2016-05-24 22:00:00		0.53	4.27	15										0		-4.229		0
2016-05-24 23:00:00		0.52	4.1	15										0		-4.228		0
2016-05-25		0.51	4.02	16										197.4		-4.231		0
2016-05-25 01:00:00		0.53	3.83	16									0	216		-4.239		0
2016-05-25 02:00:00		0.61	4.06	15									0	216		-4.248		0
2016-05-25 03:00:00		0.62	4.72	13									0	216		-4.257		0
2016-05-25 04:00:00		0.64	4.79	13									0	216		-4.266		0
2016-05-25 05:00:00		0.65	4.83	13									0	216		-4.276		0
2016-05-25 06:00:00		0.66	4.93	13									0	216		-4.285		0
2016-05-25 07:00:00		0.64	4.89	12									0	216		-4.294		0
2016-05-25 08:00:00		0.66	4.83	11									0	15.84		-4.298		0
2016-05-25 09:00:00		0.65	4.88	11									0	0		-4.297		0
2016-05-25 10:00:00		0.57	4.33	13										0	1725	-4.295		0
2016-05-25 11:00:00		0.56	3.74	16									0.5	0		-4.292		0
2016-05-25 12:00:00		0.57	3.96	16										0		-4.289		0	0.9
2016-05-25 13:00:00		0.57	4.07	16									0.6	0		-4.285		0
2016-05-25 14:00:00		0.57	4.11	16									1.2	0		-4.282		0.1
2016-05-25 15:00:00		0.58	4.11	17									0	0		-4.278		0.1
2016-05-25 16:00:00		0.58	4.26	17									0	0		-4.276		0.1
2016-05-25 17:00:00		0.57	4.17	17									0	0		-4.273		0
2016-05-25 18:00:00		0.58	4.22	16									0	0		-4.271		0
2016-05-25 19:00:00		0.57	4.41	16									0	0		-4.269		0
2016-05-25 20:00:00		0.57	4.5	15									0	0		-4.268		0.4
2016-05-25 21:00:00		0.56	4.4	15									0	0		-4.266		0.8
2016-05-25 22:00:00		0.57	4.38	14									0	0		-4.265		0
2016-05-25 23:00:00		0.57	4.29	14									0	0		-4.263		0
2016-05-26		0.55	4.19	15									0	0		-4.262		0
2016-05-26 01:00:00		0.55	4.12	16									0	0		-4.261		0
2016-05-26 02:00:00		0.55	4.03	16									0	0		-4.26		0
2016-05-26 03:00:00		0.56	4.2	16									0	0		-4.259		0
2016-05-26 04:00:00		0.54	4.25	17									0	0		-4.258		0
2016-05-26 05:00:00		0.55	4.24	18									0	0		-4.257		0
2016-05-26 06:00:00		0.54	4.19	19									0	0		-4.257		0
2016-05-26 07:00:00		0.54	4.1	19									0	0		-4.255		0
2016-05-26 08:00:00		0.55	4.07	20									0	0		-4.255		0
2016-05-26 09:00:00		0.54	4.01	20									0	0		-4.254		0
2016-05-26 10:00:00		0.54	4.03	21									0	0	0	-4.253		0.4
2016-05-26 11:00:00		0.54	4.09	21									0	0		-4.252		0.8
2016-05-26 12:00:00		0.53	4.04	21									0	0		-4.251		0.7	-3.3
2016-05-26 13:00:00		0.53	3.93	22									0	0		-4.25		0.9
2016-05-26 14:00:00		0.55	3.96	23									0	0		-4.249		0.5
2016-05-26 15:00:00		0.56	4.16	22									0	0		-4.249		0.1
2016-05-26 16:00:00		0.57	4.18	22									0	0		-4.248		0.4
2016-05-26 17:00:00		0.58	4.16	21									0	0		-4.247		0.4
2016-05-26 18:00:00		0.57	4.09	22									0	0		-4.246		0.4
2016-05-26 19:00:00		0.55	4.12	22									0	0		-4.246		0.6
2016-05-26 20:00:00		0.52	4.4	21									0	0		-4.245		1
2016-05-26 21:00:00		0.52	4.5	20									0					1
2016-05-26 22:00:00		0.53	4.53	20									0	0		-4.243		0.2
2016-05-26 23:00:00		0.48	4.55	19									0	0		-4.243		0
2016-05-27		0.47	4.37	19						0.556			0	0		-4.242		0
2016-05-27 01:00:00		0.45	3.98	19									0	0		-4.241		0
2016-05-27 02:00:00		0.42	3.86	19									0	0		-4.24		0
2016-05-27 03:00:00		0.45	3.76	20									0	0		-4.239		0
2016-05-27 04:00:00		0.46	3.94	20									0	0		-4.238		0
2016-05-27 05:00:00		0.46	3.92	21									0	0		-4.237		0
2016-05-27 06:00:00		0.46	3.87	21									0	0		-4.236		0
2016-05-27 07:00:00		0.46	3.84	21									0	0		-4.236		0.7
2016-05-27 08:00:00		0.46	3.82	21									0	0		-4.235		0.5
2016-05-27 09:00:00		0.46	3.83	22									0	0		-4.234		1
2016-05-27 10:00:00		0.48	3.82	21	1160		148				1.94	1.81	0	0	0	-4.233		0.7
2016-05-27 11:00:00		0.48	3.83	22									0	0		-4.233		0.5
2016-05-27 12:00:00		0.46	3.75	21									0	0		-4.232		0.7	-4.1
2016-05-27 13:00:00		0.45	3.68	21									0	0		-4.232		0.1
2016-05-27 14:00:00		0.48	3.78	19									0	0		-4.231		0.6
2016-05-27 15:00:00		0.47	4.04	17									0	0		-4.23		0.7
2016-05-27 16:00:00		0.46	4.09	16									0	0		-4.23		0.8
2016-05-27 17:00:00		0.49	4.18	16									0	0		-4.229		1
2016-05-27 18:00:00		0.47	4.22	15									0	0		-4.229		1
2016-05-27 19:00:00		0.46	3.98	15									0	0		-4.228		1
2016-05-27 20:00:00		0.46	3.98	15									0	0		-4.227		1
2016-05-27 21:00:00		0.43	4.03	15									0	0		-4.227		1
2016-05-27 22:00:00		0.44	3.99	14									0	0		-4.226		0.2
2016-05-27 23:00:00		0.4	3.96	14									0	0		-4.225		0
2016-05-28		0.4	4.09	15									0	196.38		-4.229		0
2016-05-28 01:00:00		0.41	3.99	15									0	216		-4.236		0
2016-05-28 02:00:00		0.53	4.08	11									0	216		-4.246		0
2016-05-28 03:00:00		0.63	4.35	11									0	216		-4.255		0
2016-05-28 04:00:00		0.59	4.31	11									0	216		-4.264		0
2016-05-28 05:00:00		0.62	4.32	10									0	216		-4.273		0
2016-05-28 06:00:00		0.65	4.3	10									0	216		-4.282		0
2016-05-28 07:00:00		0.66	4.35	10									0	216		-4.292		0
2016-05-28 08:00:00		0.7	4.3	11									0	216		-4.301		0.4
2016-05-28 09:00:00		0.71	4.39	12									0	216		-4.31		0.9
2016-05-28 10:00:00		0.75	4.38	12									0	0	2140	-4.313		0.3
2016-05-28 11:00:00		0.73	4.35	12									0	0		-4.312		1
2016-05-28 12:00:00		0.62	3.99	16									0	0		-4.309		1	-4.6
2016-05-28 13:00:00		0.61	3.57	19									0	0		-4.307		0.9
2016-05-28 14:00:00		0.66	3.66	19									0	0		-4.304		0.9
2016-05-28 15:00:00		0.67	3.93	18									0	0		-4.302		1
2016-05-28 16:00:00		0.67	4.14	18									0	0		-4.299		1
2016-05-28 17:00:00		0.64	4.21	19									0	0		-4.296		0.8
2016-05-28 18:00:00		0.64	4.35	19									0	0		-4.294		0.8
2016-05-28 19:00:00		0.65	4.47	19									0	0		-4.292		0.9
2016-05-28 20:00:00		0.63	4.5	19									0	0		-4.29		0.8
2016-05-28 21:00:00		0.6	4.28	21									0	0		-4.288		1
2016-05-28 22:00:00		0.59	4.16	21									0	0		-4.286		0.2
2016-05-28 23:00:00		0.5	4.05	22									0	0		-4.284		0
2016-05-29		0.49	3.97	20									0	0		-4.282		0
2016-05-29 01:00:00		0.56	3.92	20									0	0		-4.281		0
2016-05-29 02:00:00		0.54	3.55	20									0	0		-4.279		0
2016-05-29 03:00:00		0.53	3.5	20									0	0		-4.278		0
2016-05-29 04:00:00		0.53	3.41	19									0	0		-4.276		0
2016-05-29 05:00:00		0.5	3.4	19									0	0		-4.275		0
2016-05-29 06:00:00		0.49	3.39	19									0	0		-4.274		0
2016-05-29 07:00:00		0.5	3.36	20									0	0		-4.273		0.2
2016-05-29 08:00:00		0.52	3.35	21									0	0		-4.272		0.4
2016-05-29 09:00:00		0.53	3.38	22									0	0		-4.271		0.6
2016-05-29 10:00:00		0.53	3.36	23									0	0	0	-4.27		0.2
2016-05-29 11:00:00		0.52	3.36	23									0	0		-4.27		0
2016-05-29 12:00:00		0.51	3.33	23									0	0		-4.269		0	-1.8
2016-05-29 13:00:00		0.5	3.32	23									0	0		-4.268		0
2016-05-29 14:00:00		0.5	3.39	22									0	0		-4.267		0
2016-05-29 15:00:00		0.52	3.55	20									0	0		-4.266		0
2016-05-29 16:00:00		0.52	3.63	19									0	0		-4.265		0
2016-05-29 17:00:00		0.54	3.67	19									0	0		-4.265		0
2016-05-29 18:00:00		0.54	3.67	19									0	0		-4.264		0
2016-05-29 19:00:00		0.54	3.65	19									0	0		-4.263		0
2016-05-29 20:00:00		0.55	3.69	18									0	0		-4.262		0.2
2016-05-29 21:00:00		0.55	3.63	19									0	0		-4.261		0.5
2016-05-29 22:00:00		0.55	3.61	18										0		-4.261		0
2016-05-29 23:00:00		0.55	3.61	18									0.1	0		-4.26		0
2016-05-30		0.56	3.58	19									0	0		-4.259		0
2016-05-30 01:00:00		0.55	3.56	19									0	0		-4.258		0
2016-05-30 02:00:00		0.54	3.38	18									0	0		-4.257		0
2016-05-30 03:00:00		0.53	3.37	18									0.4	0		-4.256		0
2016-05-30 04:00:00		0.52	3.35	18										0		-4.255		0
2016-05-30 05:00:00		0.51	3.35	19									0	0		-4.254		0
2016-05-30 06:00:00		0.51	3.36	19									0	0		-4.253		0
2016-05-30 07:00:00		0.5	3.35	19									0	0		-4.252		0
2016-05-30 08:00:00		0.5	3.35	19									0	0		-4.252		0
2016-05-30 09:00:00		0.51	3.31	20									0	0		-4.251		0
2016-05-30 10:00:00		0.54	3.34	20									0	0	273	-4.25		0
2016-05-30 11:00:00		0.5	3.31	21									0	0		-4.249		0
2016-05-30 12:00:00		0.48	3.31	21									0	0		-4.249		0	14.8
2016-05-30 13:00:00		0.48	3.29	21									0	0		-4.248		0
2016-05-30 14:00:00		0.47	3.3	21									0	0		-4.247		0
2016-05-30 15:00:00		0.47	3.3	21									0	0		-4.246		0.4
2016-05-30 16:00:00		0.47	3.32	21									0	0		-4.246		0.5
2016-05-30 17:00:00		0.49	3.35	21									0	0		-4.245		0.4
2016-05-30 18:00:00		0.55	3.54	19									0	0		-4.244		0.8
2016-05-30 19:00:00		0.59	3.71	20									0	0		-4.243		0
2016-05-30 20:00:00		0.6	3.76	20										0		-4.242		0
2016-05-30 21:00:00		0.61	3.75	20									0.5	0		-4.24		0
2016-05-30 22:00:00		0.63	3.71	20									14.8	32.16		-4.189		0
2016-05-30 23:00:00		0.63	3.7	20									1.2	240.84		-4.159		0
2016-05-31		0.66	3.69	19										432		-4.163		0
2016-05-31 01:00:00		0.66	3.82	16										432		-4.176		0
2016-05-31 02:00:00		0.78	3.92	18									0	432		-4.193		0
2016-05-31 03:00:00		0.83	3.89	20									0	432		-4.21		0
2016-05-31 04:00:00		0.83	3.89	18									0	432		-4.228		0
2016-05-31 05:00:00		0.8	3.97	16									0	432		-4.244		0
2016-05-31 06:00:00		0.8	4.01	15									0	432		-4.261		0
2016-05-31 07:00:00		0.79	4.04	14									0	432		-4.278		0
2016-05-31 08:00:00		0.79	4.03	14									0	17.04		-4.286		0.3
2016-05-31 09:00:00		0.76	4.02	14									0	0		-4.285		0.9
2016-05-31 10:00:00		0.67	3.71	17									0	0	3473	-4.283		1
2016-05-31 11:00:00		0.67	3.39	21									0	0		-4.28		1
2016-05-31 12:00:00		0.69	3.37	20									0	0		-4.277		1	-3.6
2016-05-31 13:00:00		0.71	3.54	19									0	0		-4.275		0.5
2016-05-31 14:00:00		0.73	3.65	18									0	0		-4.272		0.3
2016-05-31 15:00:00		0.73	3.8	18									0	0		-4.27		0.5
2016-05-31 16:00:00		0.72	3.87	17									0	0		-4.268		0
2016-05-31 17:00:00		0.7	3.88	17									0	0		-4.265		0
2016-05-31 18:00:00		0.68	3.84	16									0	0		-4.264		0
2016-05-31 19:00:00		0.66	3.74	17									0	0		-4.262		0.9
2016-05-31 20:00:00		0.67	3.72	18									0	0		-4.26		1
2016-05-31 21:00:00		0.63	3.8	15									0	0		-4.259		1
2016-05-31 22:00:00		0.62	3.78	13									0	0		-4.257		0.2
2016-05-31 23:00:00		0.62	3.65	14									0	0		-4.256		0
2016-06-01		0.61	3.53	14									0	0		-4.255		0
2016-06-01 01:00:00		0.6	3.45	14									0	0		-4.254		0
2016-06-01 02:00:00		0.6	3.34	14									0	0		-4.253		0
2016-06-01 03:00:00		0.6	3.46	14									0	0		-4.252		0
2016-06-01 04:00:00		0.6	3.49	14									0	0		-4.251		0
2016-06-01 05:00:00		0.6	3.51	15									0	0		-4.25		0
2016-06-01 06:00:00		0.6	3.5	15									0	0		-4.249		0
2016-06-01 07:00:00		0.6	3.48	15									0	0		-4.248		0
2016-06-01 08:00:00		0.6	3.48	16									0	0		-4.247		0
2016-06-01 09:00:00		0.61	3.47	17									0	0		-4.246		0.9
2016-06-01 10:00:00		0.6	3.46	17									0	0	0	-4.246		0.6
2016-06-01 11:00:00		0.6	3.46	17									0	0		-4.245		0
2016-06-01 12:00:00		0.59	3.49	17									0	0		-4.244		0	-3.2
2016-06-01 13:00:00		0.6	3.48	16									0	0		-4.243		0.2
2016-06-01 14:00:00		0.62	3.59	15									0	0		-4.243		0.2
2016-06-01 15:00:00		0.62	3.6	14									0	0		-4.242		0.4
2016-06-01 16:00:00		0.62	3.65	14									0	0		-4.241		0.1
2016-06-01 17:00:00		0.63	3.83	14									0	0		-4.241		0.4
2016-06-01 18:00:00		0.64	3.92	16									0	0		-4.24		1
2016-06-01 19:00:00		0.63	3.73	15									0	0		-4.24		0.9
2016-06-01 20:00:00		0.62	3.61	15									0	0		-4.239		0.7
2016-06-01 21:00:00		0.64	3.62	16									0	0		-4.238		0.5
2016-06-01 22:00:00		0.64	3.52	16										0		-4.238		0
2016-06-01 23:00:00		0.6	3.46	16										0		-4.236		0
2016-06-02		0.6	3.36	18									0	0		-4.236		0
2016-06-02 01:00:00		0.6	3.44	19									0	0		-4.235		0
2016-06-02 02:00:00		0.6	3.31	18									0	0		-4.235		0
2016-06-02 03:00:00		0.6	3.36	18										0		-4.234		0
2016-06-02 04:00:00		0.6	3.39	18									0	0		-4.234		0
2016-06-02 05:00:00		0.59	3.37	19									0	0		-4.233		0
2016-06-02 06:00:00		0.59	3.36	20									0	0		-4.232		0
2016-06-02 07:00:00		0.59	3.39	20									0	0		-4.232		0
2016-06-02 08:00:00		0.6	3.41	22									0	0		-4.231		0
2016-06-02 09:00:00		0.59	3.38	22									0	0		-4.23		0
2016-06-02 10:00:00		0.58	3.33	22	1090	3.9	130	5	10	0.6	1.6		0	0	0	-4.23		0
2016-06-02 11:00:00		0.58	3.33	23										0		-4.229		0
2016-06-02 12:00:00		0.57	3.36	23									0	0		-4.228		0	-0.4
2016-06-02 13:00:00		0.56	3.34	23									0	0		-4.227		0
2016-06-02 14:00:00		0.55	3.33	23									0	0		-4.226		0
2016-06-02 15:00:00		0.54	3.35	22									0	0		-4.225		0
2016-06-02 16:00:00		0.53	3.32	22									0	0		-4.225		0
2016-06-02 17:00:00		0.52	3.36	22									0	0		-4.224		0
2016-06-02 18:00:00		0.52	3.36	22									0	0		-4.224		0
2016-06-02 19:00:00		0.52	3.35	22									0	0		-4.223		0
2016-06-02 20:00:00		0.51	3.35	22									0	0		-4.223		0
2016-06-02 21:00:00		0.52	3.38	21										0		-4.222		0
2016-06-02 22:00:00		0.53	3.4	21										0		-4.221		0
2016-06-02 23:00:00		0.53	3.4	21									0.5	0		-4.22		0
2016-06-03		0.54	3.36	21										212.82		-4.223		0
2016-06-03 01:00:00		0.58	3.53	21										216		-4.231		0
2016-06-03 02:00:00		0.65	3.7	17									0	216		-4.24		0
2016-06-03 03:00:00		0.68	3.85	16									0	216		-4.249		0
2016-06-03 04:00:00		0.81	3.96	17									0	216		-4.258		0
2016-06-03 05:00:00		0.9	4.22	18									0	216		-4.267		0
2016-06-03 06:00:00		0.91	4.39	17									0	216		-4.276		0
2016-06-03 07:00:00		0.93	4.45	15									0	216		-4.285		0
2016-06-03 08:00:00		0.92	4.49	15									0	16.08		-4.289		0
2016-06-03 09:00:00		0.89	4.56	14									0	0		-4.288		0
2016-06-03 10:00:00		0.84	4.41	16									0	0	1741	-4.286		0
2016-06-03 11:00:00		0.8	4.01	19									0	0		-4.283		0
2016-06-03 12:00:00		0.8	4.02	19									0	0		-4.281		0	-1.7
2016-06-03 13:00:00		0.79	4.14	18									0	0		-4.278		0
2016-06-03 14:00:00		0.78	4.15	18									0	0		-4.276		0
2016-06-03 15:00:00		0.78	4.24	19									0	0		-4.274		0
2016-06-03 16:00:00		0.79	4.32	18									0	0		-4.272		0
2016-06-03 17:00:00		0.77	4.34	17									0	0		-4.27		0
2016-06-03 18:00:00		0.76	4.32	16									0	0		-4.268		0.1
2016-06-03 19:00:00		0.75	4.33	16									0	0		-4.266		1
2016-06-03 20:00:00		0.75	4.36	16									0	0		-4.265		0.7
2016-06-03 21:00:00		0.76	4.39	14									0	0		-4.263		0.7
2016-06-03 22:00:00		0.73	4.4	14									0	0		-4.262		0
2016-06-03 23:00:00		0.71	4.28	14									0	0		-4.261		0
2016-06-04		0.7	4.09	16									0	0		-4.26		0
2016-06-04 01:00:00		0.69	3.96	16									0	0		-4.259		0
2016-06-04 02:00:00		0.69	3.93	17									0.1	0		-4.258		0
2016-06-04 03:00:00		0.69	3.91	17									0	0		-4.257		0
2016-06-04 04:00:00		0.68	3.89	18									0	0		-4.256		0
2016-06-04 05:00:00		0.68	3.85	19									0	0		-4.255		0
2016-06-04 06:00:00		0.67	3.85	19									0	0		-4.254		0
2016-06-04 07:00:00		0.68	3.87	20									0	0		-4.254		0
2016-06-04 08:00:00		0.7	3.92	21									0	0		-4.252		0.3
2016-06-04 09:00:00		0.69	3.87	21									0	0		-4.252		0.7
2016-06-04 10:00:00		0.68	3.84	20									0	0	0	-4.251		0.7
2016-06-04 11:00:00		0.66	3.85	21									0	0		-4.25		1
2016-06-04 12:00:00		0.66	3.87	20									0	0		-4.249		1	-4.7
2016-06-04 13:00:00		0.65	3.98	19									0	0		-4.249		1
2016-06-04 14:00:00		0.65	4.15	19									0	0		-4.248		1
2016-06-04 15:00:00		0.65	4.33	19									0	0		-4.247		1
2016-06-04 16:00:00		0.64	4.51	19									0	0		-4.247		0.9
2016-06-04 17:00:00		0.64	4.71	19									0	0		-4.246		0.8
2016-06-04 18:00:00		0.64	4.83	19									0	0		-4.246		0.9
2016-06-04 19:00:00			4.83	20									0	0		-4.245		0.6
2016-06-04 20:00:00			4.75	16									0	0		-4.245		0.9
2016-06-04 21:00:00			4.6	13									0	0		-4.244		1
2016-06-04 22:00:00			4.43	14									0	0		-4.243		0.3
2016-06-04 23:00:00			4.4	13									0	0		-4.242		0
2016-06-05			4.34	14									0	0		-4.242		0
2016-06-05 01:00:00			4.24	14									0	0		-4.241		0
2016-06-05 02:00:00			4.02	14									0	0		-4.24		0
2016-06-05 03:00:00			3.92	14									0	0		-4.24		0
2016-06-05 04:00:00			3.73	14									0					0
2016-06-05 05:00:00			3.5	14									0	0		-4.238		0
2016-06-05 06:00:00			3.42	15									0	0		-4.238		0
2016-06-05 07:00:00			3.39	16									0	0		-4.237		1
2016-06-05 08:00:00			3.29	16									0	0		-4.236		1
2016-06-05 09:00:00			3.43	16									0	0		-4.235		1
2016-06-05 10:00:00			3.43	16									0	0	551	-4.235		1
2016-06-05 11:00:00			3.43	16									0	0		-4.234		1
2016-06-05 12:00:00			3.44	17									0	0		-4.234		1	-5.2
2016-06-05 13:00:00			3.47	17									0	0		-4.233		1
2016-06-05 14:00:00			3.56	16									0	0		-4.233		1
2016-06-05 15:00:00			3.74	15									0	0		-4.232		1
2016-06-05 16:00:00			3.93	15									0	0		-4.232		1
2016-06-05 17:00:00			3.95	16									0	0		-4.232		1
2016-06-05 18:00:00			4.02	16									0	0		-4.231		1
2016-06-05 19:00:00			4.01	16									0	0		-4.231		1
2016-06-05 20:00:00			3.95	16									0	0		-4.231		1
2016-06-05 21:00:00			3.83	16									0	118.5		-4.232		1
2016-06-05 22:00:00			3.59	15									0	216		-4.24		0.3
2016-06-05 23:00:00			3.69	15									0	216		-4.25		0
2016-06-06			3.95	13									0	216		-4.261		0
2016-06-06 01:00:00			4.13	14									0	216		-4.271		0
2016-06-06 02:00:00			4.27	13									0	216		-4.282		0
2016-06-06 03:00:00			4.42	12									0	216		-4.293		0
2016-06-06 04:00:00			4.42	12									0	216		-4.303		0
2016-06-06 05:00:00			4.45	12									0	136.8		-4.312		0
2016-06-06 06:00:00			4.46	12									0	0		-4.313		0
2016-06-06 07:00:00			4.53	14									0	0		-4.311		1
2016-06-06 08:00:00			4	22									0	0		-4.308		1
2016-06-06 09:00:00			3.91	21									0	0		-4.306		1
2016-06-06 10:00:00			3.95	22									0	0	1217	-4.303		1
2016-06-06 11:00:00			4.02	20									0	0		-4.301		1
2016-06-06 12:00:00			4.06	19									0	0		-4.299		1	-5.2
2016-06-06 13:00:00			4.06	19									0	0		-4.297		1
2016-06-06 14:00:00			4.16	19									0	0		-4.295		1
2016-06-06 15:00:00			4.22	19									0	0		-4.293		1
2016-06-06 16:00:00			4.4	20									0	0		-4.291		1
2016-06-06 17:00:00			4.49	21									0	0		-4.29		1
2016-06-06 18:00:00			4.57	22									0	0		-4.288		1
2016-06-06 19:00:00			4.62	22									0	0		-4.287		1
2016-06-06 20:00:00			4.54	19									0	0		-4.285		1
2016-06-06 21:00:00			4.33	20									0	0		-4.284		1
2016-06-06 22:00:00			3.92	21									0	0		-4.283		0.3
2016-06-06 23:00:00			3.7	21									0	0		-4.282		0
2016-06-07			3.69	21									0	0		-4.281		0
2016-06-07 01:00:00			3.64	21									0	0		-4.28		0
2016-06-07 02:00:00			3.7	21									0	0		-4.279		0
2016-06-07 03:00:00			3.84	20									0	0		-4.278		0
2016-06-07 04:00:00			3.94	19									0	0		-4.277		0
2016-06-07 05:00:00			3.95	19									0	0		-4.277		0
2016-06-07 06:00:00			3.95	20									0	0		-4.276		0
2016-06-07 07:00:00			3.98	20									0	0		-4.275		0
2016-06-07 08:00:00			3.96	20									0	0		-4.274		0
2016-06-07 09:00:00			3.96	20									0	0		-4.273		0.1
2016-06-07 10:00:00			3.98	20									0	0.42	4	-4.273		0.6
2016-06-07 11:00:00			4	20									0	0		-4.272		0.6
2016-06-07 12:00:00		0.71	4.11	22									0	0		-4.272		0.2	-4.4
2016-06-07 13:00:00		0.68	4.15	23									0	0		-4.271		0.5
2016-06-07 14:00:00		0.68	4.17	23									0	0		-4.27		0.6
2016-06-07 15:00:00		0.67	4.25	20									0	3.54		-4.27		0.8
2016-06-07 16:00:00		0.67	4.28	19									0	0		-4.269		0.9
2016-06-07 17:00:00		0.69	4.38	20									0	0		-4.269		1
2016-06-07 18:00:00		0.69	4.55	20									0	0		-4.269		1
2016-06-07 19:00:00		0.69	4.6	20									0	0		-4.268		1
2016-06-07 20:00:00			4.44	19									0	0		-4.267		0.2
2016-06-07 21:00:00			4.16	20									0	0		-4.267		0
2016-06-07 22:00:00			4.01	20									0	0		-4.266		0.2
2016-06-07 23:00:00			3.95	19									0	0		-4.265		0
2016-06-08			3.87	18									0	0		-4.265		0
2016-06-08 01:00:00			3.71	18									0	0		-4.264		0
2016-06-08 02:00:00			3.7	18									0	0		-4.263		0
2016-06-08 03:00:00			3.86	19									0	0		-4.262		0
2016-06-08 04:00:00			3.86	19									0	0		-4.262		0
2016-06-08 05:00:00			3.85	20									0	0		-4.261		0
2016-06-08 06:00:00			3.83	21									0	0		-4.261		0
2016-06-08 07:00:00			3.78	20									0	0		-4.26		0
2016-06-08 08:00:00			3.79	20									0	0		-4.259		0.7
2016-06-08 09:00:00			3.81	20									0	0		-4.258		0.9
2016-06-08 10:00:00			3.83	21									0	0	0	-4.258		0.9
2016-06-08 11:00:00			3.84	21									0	0		-4.257		0.7
2016-06-08 12:00:00			3.83	20									0	0		-4.257		0.7	-4.4
2016-06-08 13:00:00			3.81	20									0	0		-4.256		0.9
2016-06-08 14:00:00			3.81	20									0	0		-4.255		1
2016-06-08 15:00:00			3.85	18									0	0		-4.255		1
2016-06-08 16:00:00			4	17									0	0		-4.255		0.8
2016-06-08 17:00:00			4.17	18									0	0		-4.254		1
2016-06-08 18:00:00			4.25	19									0	0		-4.254		0.9
2016-06-08 19:00:00			4.27	18									0	0		-4.253		0.4
2016-06-08 20:00:00			4.17	18									0	0		-4.253		0
2016-06-08 21:00:00			4.04	19									0	0		-4.252		0.3
2016-06-08 22:00:00			4	20									0	0		-4.251		0.3
2016-06-08 23:00:00			4.02	18									0	0		-4.251		0
2016-06-09			3.91	18									0	0		-4.25		0
2016-06-09 01:00:00			3.82	20									0	0		-4.25		0
2016-06-09 02:00:00			3.72	21									0	0		-4.249		0
2016-06-09 03:00:00			3.79	19									0	0		-4.248		0
2016-06-09 04:00:00			3.76	19									0	0		-4.248		0
2016-06-09 05:00:00			3.79	21									0	0		-4.247		0
2016-06-09 06:00:00			3.78	21										0		-4.246		0
2016-06-09 07:00:00			3.77	20									0	0		-4.246		0.2
2016-06-09 08:00:00			3.74	20									0	0		-4.245		0.4
2016-06-09 09:00:00			3.78	20									0	0		-4.245		0.9
2016-06-09 10:00:00			3.81	21									0	0	0	-4.244		1
2016-06-09 11:00:00			3.75	20									0	0		-4.244		1
2016-06-09 12:00:00			3.76	20									0	0		-4.243		1	-4.8
2016-06-09 13:00:00			3.77	20									0	0		-4.243		0.9
2016-06-09 14:00:00			3.82	21									0	0		-4.242		1
2016-06-09 15:00:00			3.89	18									0	0		-4.242		1
2016-06-09 16:00:00			3.95	18									0	0		-4.242		1
2016-06-09 17:00:00			4.09	18									0	0		-4.241		1
2016-06-09 18:00:00			4.18	20									0	0		-4.241		1
2016-06-09 19:00:00			4.11	21									0	0		-4.24		1
2016-06-09 20:00:00			4	24									0	0		-4.24		1
2016-06-09 21:00:00			3.98	17									0	0		-4.239		1
2016-06-09 22:00:00			4.01	18									0	0		-4.239		0.2
2016-06-09 23:00:00			4.01	23									0	0		-4.238		0
2016-06-10			4	19						0.696			0	0		-4.238		0
2016-06-10 01:00:00			4.01	23									0	0		-4.237		0
2016-06-10 02:00:00			3.91	23									0	0		-4.236		0
2016-06-10 03:00:00			3.95	23									0	0		-4.236		0
2016-06-10 04:00:00			3.98	26									0	0		-4.235		0
2016-06-10 05:00:00			3.96	26									0	0		-4.235		0
2016-06-10 06:00:00			3.99	22									0	0		-4.235		0
2016-06-10 07:00:00			3.96	18									0	0		-4.234		0
2016-06-10 08:00:00			4.05	20									0	0		-4.233		0.4
2016-06-10 09:00:00			4	18									0	0		-4.233		0.5
2016-06-10 10:00:00			3.98	18	1248		170				1.99	1.56	0	0	0	-4.232		0.9
2016-06-10 11:00:00	1199		4.05	17									0	0		-4.232	19	0.5
2016-06-10 12:00:00	1188		3.96	18									0	0		-4.231	19	0.7	-3.9
2016-06-10 13:00:00	1242		3.95	23									0	0		-4.231	20	0.6
2016-06-10 14:00:00	1250		3.92	19									0	0		-4.231	20	0.9
2016-06-10 15:00:00	1250	0.69	4.17	16									0	0		-4.23	20	0.8
2016-06-10 16:00:00	1250	0.67	4.18	16									0	0		-4.23	21	0.4
2016-06-10 17:00:00	1250	0.64		16									0	0		-4.229	21	0.7
2016-06-10 18:00:00	1250	0.63		16									0	0		-4.229	21	0.6
2016-06-10 19:00:00	1250	0.63		17									0	0		-4.229	21	0
2016-06-10 20:00:00	1250	0.61		17									0	0		-4.228	21	0
2016-06-10 21:00:00	1251	0.58		16									0	0		-4.228	21	0
2016-06-10 22:00:00	1253	0.59		17									0	0		-4.227	21	0
2016-06-10 23:00:00	1250	0.6		16									0	0		-4.227	20	0
2016-06-11	1253	0.57		21										208.14		-4.23	20	0
2016-06-11 01:00:00	1263	0.56		21										216		-4.238	20	0
2016-06-11 02:00:00	1270	0.55		11										216		-4.247	20	0
2016-06-11 03:00:00	1270	0.62		9										216		-4.256	20	0
2016-06-11 04:00:00	1270	0.64		10										216		-4.265	20	0
2016-06-11 05:00:00	1270	0.68		10									0.2	216		-4.275	19	0
2016-06-11 06:00:00	1270	0.69		11									0.3	216		-4.284	19	0
2016-06-11 07:00:00	1270	0.7		11										216		-4.293	19	0
2016-06-11 08:00:00	1278	0.73		11										216		-4.302	19	0
2016-06-11 09:00:00	1280	0.74		12									0.2	172.74		-4.311	19	0
2016-06-11 10:00:00	1271	0.76		12									0.1	0	2109	-4.313	19	0
2016-06-11 11:00:00	1270	0.77		13										0		-4.311	19	0.1
2016-06-11 12:00:00	1270	0.73		22										0		-4.309	19	0.2	-1.5
2016-06-11 13:00:00	1268	0.72		23									0	0		-4.307	19	0
2016-06-11 14:00:00	1270	0.74		21									0	0		-4.304	19	0
2016-06-11 15:00:00	1270	0.75		19									0	0		-4.302	19	0
2016-06-11 16:00:00	1270	0.75		19									0	0		-4.3	19	0
2016-06-11 17:00:00	1270	0.75		20									0	0		-4.297	20	0.3
2016-06-11 18:00:00	1270	0.75		19									0	0		-4.295	20	0.1
2016-06-11 19:00:00	1270	0.74		18									0	0		-4.293	20	0
2016-06-11 20:00:00	1270	0.73		19									0	0		-4.291	20	0.9
2016-06-11 21:00:00	1270	0.73		20									0	0		-4.289	20	0.2
2016-06-11 22:00:00	1270	0.73		20									0	0		-4.288	20	0
2016-06-11 23:00:00	1270	0.74		18									0	0		-4.286	20	0
2016-06-12	1269	0.72		21									0	0		-4.284	19	0
2016-06-12 01:00:00	1270	0.72		21									0	0		-4.283	19	0
2016-06-12 02:00:00	1270	0.7		22									0	0		-4.281	19	0
2016-06-12 03:00:00	1270	0.68		16									0	0		-4.28	19	0
2016-06-12 04:00:00	1270	0.68		16									0	0		-4.279	19	0
2016-06-12 05:00:00	1268	0.68		18									0	0		-4.278	19	0
2016-06-12 06:00:00	1266	0.68		22									0	0		-4.277	19	0
2016-06-12 07:00:00	1268	0.69		18									0	0		-4.276	19	0
2016-06-12 08:00:00	1263	0.7		19									0	0		-4.275	19	0
2016-06-12 09:00:00	1260	0.7		22									0	0		-4.274	18	0.4
2016-06-12 10:00:00	1261	0.68		26									0	0	0	-4.274	18	0.2
2016-06-12 11:00:00	1260	0.67		21									0	0		-4.273	19	0.5
2016-06-12 12:00:00	1260	0.66		21									0	0		-4.272	19	0.3	4.2
2016-06-12 13:00:00	1263	0.67		22									0	0		-4.271	19	0
2016-06-12 14:00:00	1268	0.67		21										0		-4.271	20	0
2016-06-12 15:00:00	1280	0.68		18									0	0		-4.27	20	0.5
2016-06-12 16:00:00	1280	0.72		18									0	0		-4.27	21	0.2
2016-06-12 17:00:00	1280	0.73		17									0	0		-4.269	21	0.1
2016-06-12 18:00:00	1280	0.72		16									0	0		-4.268	21	0.4
2016-06-12 19:00:00	1279	0.73		18									0	0		-4.267	21	0
2016-06-12 20:00:00	1280	0.71		17									0	0		-4.267	21	0
2016-06-12 21:00:00	1279	0.71		16									0	0		-4.266	21	0
2016-06-12 22:00:00	1273	0.68		17									0.5	0		-4.265	20	0
2016-06-12 23:00:00	1265	0.66		16									2.1	0		-4.265	20	0
2016-06-13	1268	0.65		23									1.4	0		-4.263	20	0
2016-06-13 01:00:00	1268	0.65		25									3	0		-4.259	20	0
2016-06-13 02:00:00	1258	0.65		27									0.5	0		-4.254	20	0
2016-06-13 03:00:00	1260	0.65		20									0.8	0		-4.25	20	0
2016-06-13 04:00:00	1260	0.65		19									2	0		-4.245	19	0
2016-06-13 05:00:00	1243	0.65		20									0.3	0		-4.242	19	0
2016-06-13 06:00:00	1243	0.65		20									0	0		-4.24	19	0
2016-06-13 07:00:00	1260	0.66		19									0	0		-4.239	19	0
2016-06-13 08:00:00	1225	0.67		20									0	0		-4.239	19	0
2016-06-13 09:00:00	1228	0.65		23									0	0		-4.238	19	0
2016-06-13 10:00:00	1234	0.65		25									0	0	0	-4.238	19	0.1
2016-06-13 11:00:00	1260	0.64		20									0	0		-4.237	19	0
2016-06-13 12:00:00	1260	0.63		19									0	0		-4.236	19	0	2
2016-06-13 13:00:00	1260	0.63		21									0	0		-4.236	19	0
2016-06-13 14:00:00	1260	0.66		20									0	0		-4.235	19	0.2
2016-06-13 15:00:00	1258	0.65		19									0	0		-4.235	19	0.2
2016-06-13 16:00:00	1258	0.65		21									0	0		-4.234	19	0
2016-06-13 17:00:00	1259	0.65		20									0	0		-4.234	19	0
2016-06-13 18:00:00	1260	0.65		17									0	0		-4.233	19	0
2016-06-13 19:00:00	1253	0.65		14									0	0		-4.232	19	0
2016-06-13 20:00:00	1257	0.66		16									0	0		-4.232	19	0.1
2016-06-13 21:00:00	1254	0.65		17									0	0		-4.232	19	0.3
2016-06-13 22:00:00	1251	0.65		18									0	0		-4.231	19	0.3
2016-06-13 23:00:00	1246	0.65		16									0	0		-4.23	19	0
2016-06-14	1258	0.64		17									0	207.9		-4.232	19	0
2016-06-14 01:00:00	1260	0.66		18									0	216		-4.238	19	0
2016-06-14 02:00:00	1260	0.67		16									0.1	216		-4.244	19	0
2016-06-14 03:00:00	1259	0.66		14										216		-4.25	19	0
2016-06-14 04:00:00	1260	0.65		13									0	216		-4.257	19	0
2016-06-14 05:00:00	1263	0.63		13										216		-4.263	19	0
2016-06-14 06:00:00	1267	0.63		13									0	216		-4.269	18	0
2016-06-14 07:00:00	1268	0.64		11									0	216		-4.276	18	0
2016-06-14 08:00:00	1263	0.66		11									0	1.74		-4.278	18	0
2016-06-14 09:00:00	1260	0.68		11										0		-4.278	18	0
2016-06-14 10:00:00	1258	0.67		14										0	1722	-4.276	18	0
2016-06-14 11:00:00	1260	0.67		16										0		-4.274	18	0.1
2016-06-14 12:00:00	1260	0.67		17										0		-4.272	18	0.1	5.9
2016-06-14 13:00:00	1261	0.66		17									3.5	0		-4.27	18	0.1
2016-06-14 14:00:00	1260	0.67		17									3.1	0		-4.262	19	0
2016-06-14 15:00:00	1260	0.7		16									0.9	0		-4.254	19	0
2016-06-14 16:00:00	1260	0.7		16										0		-4.25	19	0.5
2016-06-14 17:00:00	1256	0.7		16									0	0		-4.248	19	0.2
2016-06-14 18:00:00	1244	0.71		17									0	0		-4.246	20	0.3
2016-06-14 19:00:00	1233	0.7		15									0	0		-4.245	20	0.3
2016-06-14 20:00:00	1230	0.68		13									0	0		-4.245	20	0.4
2016-06-14 21:00:00	1230	0.68		14									0	0		-4.244	19	0.8
2016-06-14 22:00:00	1230	0.7		15									0	0		-4.243	19	0.3
2016-06-14 23:00:00	1229	0.68		15									0	0		-4.243	19	0
2016-06-15	1223	0.68		17									0	0		-4.242	19	0
2016-06-15 01:00:00	1221	0.67		18									0	0		-4.241	19	0
2016-06-15 02:00:00	1220	0.67		19									0	0		-4.241	18	0
2016-06-15 03:00:00	1221	0.68		17									0	0		-4.24	18	0
2016-06-15 04:00:00	1220	0.68		18									0	0		-4.239	18	0
2016-06-15 05:00:00	1220	0.68		18									0	0		-4.239	18	0
2016-06-15 06:00:00	1220	0.69		19									0	0		-4.238	18	0
2016-06-15 07:00:00	1220	0.69		20									0	0		-4.238	18	0
2016-06-15 08:00:00	1220	0.68		21									0	0		-4.237	18	0
2016-06-15 09:00:00	1220	0.68		23									0	0		-4.236	18	0
2016-06-15 10:00:00	1229	0.67		23									0	0	0	-4.235	18	0
2016-06-15 11:00:00	1228	0.66		20									1.7	0		-4.235	18	0.1
2016-06-15 12:00:00	1230	0.66		21										0		-4.233	18	0	1.5
2016-06-15 13:00:00	1230	0.65		20										0		-4.232	18	0.1
2016-06-15 14:00:00	1230	0.67		21									0.2	0		-4.232	18	0.6
2016-06-15 15:00:00	1233	0.66		21									1.4	0		-4.231	18	0.3
2016-06-15 16:00:00	1240	0.65		20									0.1	0		-4.23	18	0
2016-06-15 17:00:00	1240	0.69		20										0		-4.229	18	0
2016-06-15 18:00:00	1242	0.68		17									0	0		-4.228	18	0
2016-06-15 19:00:00	1244	0.67		16										0		-4.228	18	0
2016-06-15 20:00:00	1250	0.67		15									0.1	0		-4.227	18	0.9
2016-06-15 21:00:00	1250	0.67		16									0	0		-4.227	18	0.5
2016-06-15 22:00:00	1250	0.67		15									0	0		-4.226	18	0.3
2016-06-15 23:00:00	1250	0.68		15									0	0		-4.225	18	0
2016-06-16	1250	0.68		17									0	211.26		-4.228	18	0
2016-06-16 01:00:00	1250	0.69		19									0	216		-4.233	18	0
2016-06-16 02:00:00	1250	0.68		16									0.1	216		-4.239	18	0
2016-06-16 03:00:00	1250	0.66		15									0	216		-4.246	18	0
2016-06-16 04:00:00	1248	0.62		13									0	216		-4.252	18	0
2016-06-16 05:00:00	1247	0.62		11									0	216		-4.259	18	0
2016-06-16 06:00:00	1248	0.64		11									0	216		-4.265	18	0
2016-06-16 07:00:00	1249	0.65		10									0	216		-4.272	18	1
2016-06-16 08:00:00	1248	0.68		10									0	18.84		-4.276	17	1
2016-06-16 09:00:00	1240	0.69		11									0	0		-4.276	17	1
2016-06-16 10:00:00	1240	0.67		14									0	0	1742	-4.274	17	1
2016-06-16 11:00:00	1240	0.68		15									0	0		-4.272	17	0.9
2016-06-16 12:00:00	1240	0.67		16									0	0		-4.27	18	0.8	7.6
2016-06-16 13:00:00	1244	0.66		17									0	0		-4.269	18	0.7
2016-06-16 14:00:00	1240	0.68		16									0	0		-4.267	19	0.4
2016-06-16 15:00:00	1240	0.69		14									0	0		-4.265	19	0
2016-06-16 16:00:00	1240	0.69		15									0	0		-4.264	19	0
2016-06-16 17:00:00	1238	0.68		14									0	0		-4.262	19	0.1
2016-06-16 18:00:00	1230	0.68		20									0	0		-4.261	19	0
2016-06-16 19:00:00	1230	0.66		27									0	0		-4.26	19	0
2016-06-16 20:00:00	1230	0.66		28										0		-4.259	19	0
2016-06-16 21:00:00	1230	0.64		19									0.2	0		-4.258	19	0
2016-06-16 22:00:00	1230	0.63		20									5.9	0		-4.256	19	0
2016-06-16 23:00:00	1229	0.64		18									1.3	0		-4.254	19	0
2016-06-17	1220	0.65		20						0.656				0		-4.253	19	0
2016-06-17 01:00:00	1220	0.62		21									3.1	0		-4.249	19	0
2016-06-17 02:00:00	1220	0.6		19									1.1	0		-4.245	19	0
2016-06-17 03:00:00	1220	0.6		17									0.3	0		-4.24	18	0
2016-06-17 04:00:00	1220	0.6		17									0.2	0		-4.238	18	0
2016-06-17 05:00:00	1220	0.61		17									0.2	0		-4.236	18	0
2016-06-17 06:00:00	1219	0.61		17									0.6	0		-4.234	18	0
2016-06-17 07:00:00	1218	0.62		16									0.5	0		-4.233	18	0
2016-06-17 08:00:00	1213	0.62		18									2.6	0		-4.227	18	0
2016-06-17 09:00:00	1206	0.61		23									1.2	0		-4.221	18	0
2016-06-17 10:00:00	1210	0.6		24	1198		168				2.72	1.05		0	0	-4.217	18	0.4
2016-06-17 11:00:00	1210	0.61		17									0	0		-4.216	18	0.6
2016-06-17 12:00:00	1205	0.64		17									0	0		-4.215	18	0.9	3.1
2016-06-17 13:00:00	1192	0.61		21									0	0		-4.214	19	0.7
2016-06-17 14:00:00	1187	0.62		18									0	0		-4.214	20	0.7
2016-06-17 15:00:00	1190	0.64		11									0	0		-4.214	20	0.9
2016-06-17 16:00:00	1196	0.65		11									0	0		-4.214	21	0.8
2016-06-17 17:00:00	1199	0.65		12									0	0		-4.214	21	0.6
2016-06-17 18:00:00	1200	0.65		14									0	0		-4.214	22	0.6
2016-06-17 19:00:00	1199	0.66		13									0	0		-4.213	22	0.5
2016-06-17 20:00:00	1200	0.66		13									0	0		-4.213	21	0
2016-06-17 21:00:00	1200	0.66		12									0	0		-4.213	21	0.8
2016-06-17 22:00:00	1200	0.65		13									0	0		-4.213	21	0.3
2016-06-17 23:00:00	1199	0.64		12									0	0		-4.213	20	0
2016-06-18	1200	0.63		16									0	199.44		-4.217	20	0
2016-06-18 01:00:00	1207	0.63		18									0	216		-4.224	20	0
2016-06-18 02:00:00	1214	0.62		17									0	216		-4.233	20	0
2016-06-18 03:00:00	1220	0.65	4.37	11									0	216		-4.242	19	0
2016-06-18 04:00:00	1220	0.65	4.46	10									0	216		-4.252	19	0
2016-06-18 05:00:00	1219	0.65	4.53	10									0	216		-4.261	19	0
2016-06-18 06:00:00	1214	0.66	4.57	10									0	216		-4.27	19	0
2016-06-18 07:00:00	1210	0.68	4.51	9									0	216		-4.279	19	1
2016-06-18 08:00:00	1215	0.7	4.54	10									0	216		-4.288	18	0.4
2016-06-18 09:00:00	1219	0.72	4.58	11										216		-4.297	18	0.2
2016-06-18 10:00:00	1213	0.72	4.57	12										216	2460	-4.306	18	0
2016-06-18 11:00:00	1212	0.74	4.6	11									0.7	100.86		-4.313	18	0.1
2016-06-18 12:00:00	1210	0.75	4.57	11									0	0		-4.312	18	0.3	-1.3
2016-06-18 13:00:00	1210	1.13	4.62	12										0		-4.311	18	0.1
2016-06-18 14:00:00	1208	0.73	4.24	15									0	0		-4.308	18	0
2016-06-18 15:00:00	1200	0.73	4.01	14									0	0		-4.306	18	0.3
2016-06-18 16:00:00	1200	0.73	4.04	16										0		-4.303	18	0.3
2016-06-18 17:00:00	1200	0.73	4.09	16										0		-4.3	19	0.2
2016-06-18 18:00:00	1200	0.73	4.19	18									0	0		-4.298	19	0
2016-06-18 19:00:00	1200	0.72	4.2	15									0	0		-4.296	19	0
2016-06-18 20:00:00	1200	0.73	4.27	15										0		-4.294	19	0
2016-06-18 21:00:00	1201	0.72	4.23	16										0		-4.292	18	0
2016-06-18 22:00:00	1201	0.72	4.16	18										0		-4.29	18	0
2016-06-18 23:00:00	1201	0.72	4.16	16										0		-4.288	18	0
2016-06-19	1202	0.72	4.13	16										0		-4.287	18	0
2016-06-19 01:00:00	1203	0.72	4.12	18									0	0		-4.285	18	0
2016-06-19 02:00:00	1201	0.72	4.11	20									0	0		-4.284	18	0
2016-06-19 03:00:00	1201	0.73	4.15	17									0	0		-4.282	18	0
2016-06-19 04:00:00	1203	0.74	4.15	18										0		-4.281	17	0
2016-06-19 05:00:00	1201	0.75	4.13	21									0	0		-4.28	17	0
2016-06-19 06:00:00	1200	0.75	4.13	20									0	0		-4.279	17	0
2016-06-19 07:00:00	1198	0.75	4.09	17									0	0		-4.278	17	0
2016-06-19 08:00:00	1200	0.75	4.13	18									0	0		-4.277	17	0.5
2016-06-19 09:00:00	1200	0.75	4.1	20									0	0		-4.277	17	1
2016-06-19 10:00:00	1200	0.74	4.11	20									0	0	0	-4.276	17	0.6
2016-06-19 11:00:00	1200	0.74	4.15	19									0	0		-4.276	17	0.1
2016-06-19 12:00:00	1200	0.74	4.15	19									0	0		-4.275	17	0.6	-3.7
2016-06-19 13:00:00	1208	0.74	3.97	21									0	0		-4.274	18	0.5
2016-06-19 14:00:00	1210	0.74	3.94	22									0	0		-4.274	19	0.6
2016-06-19 15:00:00	1210	0.73	3.95	18									0	0		-4.273	19	0.9
2016-06-19 16:00:00	1210	0.73	4.13	16									0	0		-4.273	20	0.8
2016-06-19 17:00:00	1210	0.74	4.23	16									0	0		-4.272	20	0.9
2016-06-19 18:00:00	1210	0.74	4.24	16									0	0		-4.271	20	0.7
2016-06-19 19:00:00	1210	0.73	4.31	15									0	0		-4.271	21	0.1
2016-06-19 20:00:00	1210	0.73	4.32	21									0	0		-4.27	21	0.3
2016-06-19 21:00:00	1210	0.73	4.45	19									0	0		-4.269	20	0.7
2016-06-19 22:00:00	1210	0.73	4.46	18									0	0		-4.269	20	0.2
2016-06-19 23:00:00	1205	0.72	4.35	16									0	0		-4.268	20	0
2016-06-20	1210	0.7	4.2	18									0	0		-4.267	19	0
2016-06-20 01:00:00	1203	0.72	4.2	19									0	0		-4.267	19	0
2016-06-20 02:00:00	1202	0.72	4.24	19									0	0		-4.266	19	0
2016-06-20 03:00:00	1202	0.71	4.03	19									0	0		-4.265	19	0
2016-06-20 04:00:00	1199	0.71	4.02	19									0	0		-4.265	19	0
2016-06-20 05:00:00	1197	0.71	3.97	20										0		-4.264	18	0
2016-06-20 06:00:00	1200	0.71	3.93	21									0.1	0		-4.263	18	0
2016-06-20 07:00:00	1198	0.71	3.92	21									0.7	0		-4.262	18	0
2016-06-20 08:00:00	1200	0.72	3.96	23									1	0		-4.259	18	0
2016-06-20 09:00:00	1200	0.71	4.08	24									0.6	0		-4.257	18	0
2016-06-20 10:00:00	1200	0.69	3.92	29	1190	4.6	140		7	0.69	1.7		0.6	0	1346	-4.254	18	0
2016-06-20 11:00:00	1200	0.69	3.97	23									0.4	0		-4.251	18	0
2016-06-20 12:00:00	1200	0.68	3.93	22									0.2	0		-4.249	18	0	21.1
2016-06-20 13:00:00	1200	0.67	3.95	30									0.5	0		-4.246	18	0
2016-06-20 14:00:00	1200	0.66	3.84	30									1.7	0		-4.242	18	0
2016-06-20 15:00:00	1193	0.65	3.8	21									2.5	0		-4.232	18	0
2016-06-20 16:00:00	1186	0.65	3.88	20									4.3	0		-4.218	17	0
2016-06-20 17:00:00	1180	0.65	3.85	20									5.1	50.1		-4.194	17	0
2016-06-20 18:00:00	1178	0.64	3.88	21									2	216		-4.178	18	0
2016-06-20 19:00:00	1152	0.63	3.94	18									1.9	216		-4.166	18	0
2016-06-20 20:00:00	1105	0.66	4.09	15									0.2	216		-4.162	18	0.1
2016-06-20 21:00:00	1031	0.66	4.28	15									0	216		-4.165	18	0
2016-06-20 22:00:00	1008	0.61	4.2	14									0	216		-4.172	18	0
2016-06-20 23:00:00	1014	0.59	3.92	13									0	216		-4.179	18	0
2016-06-21	1029	0.6	3.74	13									0	411.9		-4.191	18	0
2016-06-21 01:00:00	1049	0.6	4.04	13										432		-4.207	18	0
2016-06-21 02:00:00	1045	0.62	4.03	13									0	432		-4.223	18	0
2016-06-21 03:00:00	1028	0.63	4.01	11									0	432		-4.24	18	0
2016-06-21 04:00:00	1022	0.63	4.16	12									0	432		-4.257	17	0
2016-06-21 05:00:00	1013	0.62	4.06	12									0	432		-4.273	17	0
2016-06-21 06:00:00	999	0.63	3.96	13									0	432		-4.29	17	0
2016-06-21 07:00:00	990	0.64	4	13									0	216		-4.302	17	0.2
2016-06-21 08:00:00	993	0.64	3.98	14									0	17.22		-4.305	17	0.3
2016-06-21 09:00:00	1000	0.64	3.83	14									0	0		-4.303	17	0.5
2016-06-21 10:00:00	992	0.63	3.81	14									0	0	3237	-4.3	17	0.4
2016-06-21 11:00:00	989	0.63	3.52	13									0	0		-4.297	17	0
2016-06-21 12:00:00	990	0.62	3.53	13									0	0		-4.294	17	0	-0.4
2016-06-21 13:00:00	990	0.63	3.59	14									0	0		-4.291	17	0
2016-06-21 14:00:00	990	0.65	3.62	14									0	0		-4.288	17	0.2
2016-06-21 15:00:00	990	0.66	3.71	13									0	0		-4.285	18	0
2016-06-21 16:00:00	988	0.64	3.79	13									0.5	0		-4.282	18	0
2016-06-21 17:00:00	980	0.64	3.93	15									0.1	0		-4.279	18	0.1
2016-06-21 18:00:00	974	0.63	4	17										0		-4.277	19	0
2016-06-21 19:00:00	969	0.61	3.89	11									0.5	0		-4.274	19	0
2016-06-21 20:00:00	960	0.61	3.72	10									0.2	0		-4.272	19	0
2016-06-21 21:00:00	960	0.61	3.38	11									0	0		-4.27	19	0.2
2016-06-21 22:00:00	960	0.62	3.24	14									0	0		-4.268	19	0.3
2016-06-21 23:00:00	960	0.63	3.22	13									0	0		-4.266	18	0
2016-06-22	960	0.63	3.2	14									0	0		-4.264	18	0
2016-06-22 01:00:00	960	0.61		15									0	0		-4.263	18	0
2016-06-22 02:00:00	960	0.62		26									0	0		-4.262	18	0
2016-06-22 03:00:00	963	0.62		14									0	0		-4.26	18	0
2016-06-22 04:00:00	970	0.62		14									0	0		-4.259	18	0
2016-06-22 05:00:00	970	0.62		15									0	0		-4.258	17	0
2016-06-22 06:00:00	971	0.62		17									0	0		-4.257	17	0.2
2016-06-22 07:00:00	980	0.63		16									0	0		-4.256	17	0.3
2016-06-22 08:00:00	980	0.64		15									0	0		-4.255	17	0.4
2016-06-22 09:00:00	980	0.62		15									0	0		-4.254	17	1
2016-06-22 10:00:00	980	0.62		16									0	0	0	-4.253	17	1
2016-06-22 11:00:00	980	0.61		15									0	0		-4.252	18	0.9
2016-06-22 12:00:00	978	0.62		16									0	0		-4.251	18	0.9	-4.2
2016-06-22 13:00:00	979	0.62		16									0	0		-4.251	19	1
2016-06-22 14:00:00	980	0.61		14									0	0		-4.25	19	0.4
2016-06-22 15:00:00	980	0.63		13									0	0		-4.249	19	0.3
2016-06-22 16:00:00	980	0.63		18									0	0		-4.248	20	0
2016-06-22 17:00:00	980	0.63		26									0	0		-4.247	20	0.4
2016-06-22 18:00:00	980	0.61		26									0	0		-4.247	20	0.6
2016-06-22 19:00:00	980	0.61		15									0	0		-4.246	20	1
2016-06-22 20:00:00	980	0.6		13									0	0		-4.245	20	1
2016-06-22 21:00:00	980	0.6		12									0	0		-4.244	20	1
2016-06-22 22:00:00	977	0.61		12									0	0		-4.243	21	0.5
2016-06-22 23:00:00	970	0.6		11									0	0		-4.242	21	0
2016-06-23	970	0.59		10									0	0		-4.241	21	0
2016-06-23 01:00:00	976	0.6		10										0		-4.24	21	0
2016-06-23 02:00:00	980	0.61		10									1.1	0		-4.239	21	0
2016-06-23 03:00:00	980	0.59		10									9.7	0		-4.234	20	0
2016-06-23 04:00:00	973	0.59		9									1.6	190.62		-4.197	20	0
2016-06-23 05:00:00	963			9									0.1	216		-4.19	20	0
2016-06-23 06:00:00	945			8									11.1	216		-4.194	20	0
2016-06-23 07:00:00	912			8									3.6	216		-4.197	20	0
2016-06-23 08:00:00	850			7									5	216		-4.167	20	0
2016-06-23 09:00:00	790			7									0.8	417.3		-4.088	20	0
2016-06-23 10:00:00	699			7									0	432	6577	-4.092	19	0
2016-06-23 11:00:00	594			7									0.2	432		-4.112	19	0
2016-06-23 12:00:00	618			7									3	432		-4.124	19	0	35
2016-06-23 13:00:00	689			7									0.9	432		-4.136	19	0
2016-06-23 14:00:00	743			7									0.2	432		-4.151	20	0.3
2016-06-23 15:00:00	778			8									0	432		-4.167	20	0.9
2016-06-23 16:00:00	781	0.55		9									0	432		-4.182	21	1
2016-06-23 17:00:00	773	0.54		10									0	432		-4.198	21	0.8
2016-06-23 18:00:00	738	0.53		10										432		-4.214	21	0.3
2016-06-23 19:00:00	718	0.53	3.25	9										432		-4.229	21	0.5
2016-06-23 20:00:00	697	0.5	3.27	9										367.2		-4.244	22	0
2016-06-23 21:00:00	693	0.47	3.05	9									0.3	216		-4.253	21	0
2016-06-23 22:00:00	704	0.46	2.84	9										201.6		-4.26	21	0.5
2016-06-23 23:00:00	700	0.45	2.51	8										0		-4.261	21	0
2016-06-24	700	0.45	2.45	8										0		-4.258	21	0
2016-06-24 01:00:00	714	0.46	2.19	9									0	0		-4.254	21	0
2016-06-24 02:00:00	720	0.45	1.9	11									0	0		-4.25	21	0
2016-06-24 03:00:00	720	0.44	1.92	11									0	0		-4.246	21	0
2016-06-24 04:00:00	723	0.44	2	10									0	0		-4.243	21	0
2016-06-24 05:00:00	730	0.44	2	10									0	0		-4.24	21	0
2016-06-24 06:00:00	730	0.44	2	10									0	0		-4.237	21	0
2016-06-24 07:00:00	723	0.44	2	10									0	0		-4.234	21	0
2016-06-24 08:00:00	723	0.45	1.99	10									0	0		-4.231	20	0
2016-06-24 09:00:00	733	0.48	2.03	10									0	0		-4.229	20	0.1
2016-06-24 10:00:00	740	0.49	2.02	11									0	0	0	-4.227	20	0.1
2016-06-24 11:00:00	740	0.49	1.99	12									0	0		-4.225	20	0.1
2016-06-24 12:00:00	740	0.48	1.99	11										0		-4.223	20	0	-3.3
2016-06-24 13:00:00	731	0.47	1.99	11									0	0		-4.221	20	0.1
2016-06-24 14:00:00	720	0.59	2.01	10									0	0		-4.22	20	0.3
2016-06-24 15:00:00	704	0.52	2.02	10									0	0		-4.219	21	0.7
2016-06-24 16:00:00	700	0.51	2.06	9									0	0		-4.217	22	0.7
2016-06-24 17:00:00	700	0.52	2.11	8									0	0		-4.216	22	0.9
2016-06-24 18:00:00	701	0.51	2.16	8									0	0		-4.214	22	1
2016-06-24 19:00:00	710	0.52	2.18	8									0				22	1
2016-06-24 20:00:00	710	0.52	2.16	7									0	0		-4.212	22	0.8
2016-06-24 21:00:00	710	0.51	2.12	7									0	0		-4.211	22	1
2016-06-24 22:00:00	713	0.51	2.05	9									0	0		-4.209	22	0.5
2016-06-24 23:00:00	725	0.51	2.03	9									0	0		-4.208	21	0
2016-06-25	739	0.52	2.01	10									0	200.28		-4.21	21	0
2016-06-25 01:00:00	747	0.51	1.99	11									0	216		-4.215	21	0
2016-06-25 02:00:00	763	0.49	2.04	11									0	216		-4.221	21	0
2016-06-25 03:00:00	779	0.51	2.09	8									0	216		-4.228	20	0
2016-06-25 04:00:00	793	0.54	2.1	8									0	216		-4.234	20	0
2016-06-25 05:00:00	800	0.56	2.14	8									0	216		-4.239	20	0
2016-06-25 06:00:00	800	0.59	2.18	9									0	216		-4.245	20	0
2016-06-25 07:00:00	800	0.61	2.19	8									0	216		-4.251	20	0.5
2016-06-25 08:00:00	800	0.62	2.2	8									0	216		-4.257	20	0
2016-06-25 09:00:00	794	0.65	2.25	8									0	216		-4.262	19	0.2
2016-06-25 10:00:00	798	0.66	2.28	8									0	216	3973	-4.268	19	0.3
2016-06-25 11:00:00	784	0.68	2.31	9									0	216		-4.273	20	0.2
2016-06-25 12:00:00	780	0.69	2.34	9									0	216		-4.279	20	0	-2.2
2016-06-25 13:00:00	780	0.69	2.33	9									0	216		-4.285	20	0
2016-06-25 14:00:00	780	0.72	2.31	9									0	216		-4.29	20	0
2016-06-25 15:00:00	780	0.68	2.35	9										216		-4.296	20	0
2016-06-25 16:00:00	783	0.69	2.36	9										216		-4.301	20	0
2016-06-25 17:00:00	799	0.69	2.38	9									0	216		-4.307	20	0
2016-06-25 18:00:00	800	0.69	2.4	9									0	100.8		-4.311	20	0
2016-06-25 19:00:00	800	0.69	2.43	9									0	0		-4.309	20	0.8
2016-06-25 20:00:00	800	0.71	2.44	10									0	0		-4.306	20	1
2016-06-25 21:00:00	800	0.7	2.38	11									0	0		-4.303	20	1
2016-06-25 22:00:00	799	0.7	2.41	11									0	0		-4.3	20	0.5
2016-06-25 23:00:00	800	0.71	2.42	11									0	0		-4.296	20	0
2016-06-26	808	0.71	2.4	11									0	0		-4.293	19	0
2016-06-26 01:00:00	813	0.71	2.41	12									0	0		-4.291	19	0
2016-06-26 02:00:00	820	0.72	2.4	13									0	0		-4.288	19	0
2016-06-26 03:00:00	821	0.72	2.41	14									0	0		-4.285	19	0
2016-06-26 04:00:00	832	0.73	2.43	15									0	0		-4.282	18	0
2016-06-26 05:00:00	840	0.74	2.47	16									0	0		-4.28	18	0
2016-06-26 06:00:00	848	0.74	2.5	17									0.2	0		-4.278	18	0
2016-06-26 07:00:00	857	0.75	2.48	18									0	0		-4.276	18	0.7
2016-06-26 08:00:00	860	0.76	2.51	19									0	0		-4.274	18	0.7
2016-06-26 09:00:00	868	0.76	2.45	19									0	0		-4.272	18	0.7
2016-06-26 10:00:00	870	0.75	2.47	19									0	0	0	-4.27	18	0.9
2016-06-26 11:00:00	870	0.75	2.47	18									0	0		-4.269	18	0.5
2016-06-26 12:00:00	878	0.74	2.48	18									0	0		-4.268	19	0.8	-4.1
2016-06-26 13:00:00	880	0.75	2.52	18									0	0		-4.266	19	1
2016-06-26 14:00:00	880	0.77	2.62	16									0	0		-4.265	20	0.9
2016-06-26 15:00:00	880	0.78	2.68	14									0	0		-4.264	20	0.6
2016-06-26 16:00:00	880	0.79	2.66	14									0	0		-4.262	20	0.7
2016-06-26 17:00:00	880	0.79	2.67	14									0	0		-4.261	21	0.9
2016-06-26 18:00:00	880	0.79	2.66	14									0	0		-4.26	21	1
2016-06-26 19:00:00	880	0.79	2.67	14									0	0		-4.259	21	0.9
2016-06-26 20:00:00	880	0.78	2.66	13									0	0		-4.258	21	1
2016-06-26 21:00:00	880	0.78	2.66	14									0	0		-4.257	21	0.7
2016-06-26 22:00:00	882	0.77	2.66	14									0	0		-4.255	20	0.5
2016-06-26 23:00:00	890	0.77	2.64	14									0	0		-4.254	20	0
2016-06-27	899	0.76	2.6	14						0.786			0	0		-4.253	20	0
2016-06-27 01:00:00	900	0.76	2.51	15									0	0		-4.252	20	0
2016-06-27 02:00:00	900	0.76	2.49	15									0	0		-4.251	19	0
2016-06-27 03:00:00	903	0.76	2.51	16										0		-4.249	19	0
2016-06-27 04:00:00	903	0.75	2.5	17										0		-4.248	19	0
2016-06-27 05:00:00	916	0.75	2.49	17									0	0		-4.247	19	0
2016-06-27 06:00:00	917	0.75	2.52	17									0	0		-4.246	19	0
2016-06-27 07:00:00	918	0.74	2.51	18									0	0		-4.245	19	0.2
2016-06-27 08:00:00	921	0.74	2.51	18										0		-4.244	18	0
2016-06-27 09:00:00	920	0.73	2.48	18									0	0		-4.243	18	0
2016-06-27 10:00:00	926	0.73	2.48	17	907		113				2.22	2.08	0	0	0	-4.241	18	0
2016-06-27 11:00:00	926	0.73	2.47	18									0	0		-4.24	18	0
2016-06-27 12:00:00	923	0.73	2.52	17									0.6	0		-4.239	18	0	1.5
2016-06-27 13:00:00	912	0.72	2.54	17									3	0		-4.233	18	0
2016-06-27 14:00:00	920	0.72	2.54	17									0.2	0		-4.227	18	0.1
2016-06-27 15:00:00	917	0.71	2.52	16									0	0		-4.224	19	0.1
2016-06-27 16:00:00	910	0.72	2.53	15									0	0		-4.222	19	0.2
2016-06-27 17:00:00	910	0.74	2.57	14									0	0		-4.221	19	0.2
2016-06-27 18:00:00	907	0.75	2.64	14									0	0		-4.22	20	1
2016-06-27 19:00:00	908	0.75	2.66	13									0	0		-4.219	20	1
2016-06-27 20:00:00	910	0.75		10									0	0		-4.219	20	1
2016-06-27 21:00:00	910	0.75		11									0	0		-4.218	20	1
2016-06-27 22:00:00	910	0.75		13									0	0		-4.217	19	0.5
2016-06-27 23:00:00	918	0.75		13									0	0		-4.217	19	0
2016-06-28	920	0.75		13									0	199.44		-4.22	19	0
2016-06-28 01:00:00	931	0.74		14									0	216		-4.228	19	0
2016-06-28 02:00:00	935	0.72		15									0	216		-4.237	19	0
2016-06-28 03:00:00	941	0.74		15									0	216		-4.246	19	0
2016-06-28 04:00:00	940	0.76		14									0	216		-4.255	18	0
2016-06-28 05:00:00	940	0.76		14									0	216		-4.263	18	0
2016-06-28 06:00:00	940	0.75		13									0	216		-4.272	18	0
2016-06-28 07:00:00	934	0.77		13									0	216		-4.281	18	0.2
2016-06-28 08:00:00	944	0.79		13									0	11.76		-4.284	18	0.2
2016-06-28 09:00:00	943	0.81		13									0	0		-4.283	18	0.1
2016-06-28 10:00:00	940	0.79		14										0	1723	-4.28	18	0
2016-06-28 11:00:00	941	0.78		15									0	0		-4.277	18	0.7
2016-06-28 12:00:00	948	0.77		15									0	0		-4.275	18	1	3.6
2016-06-28 13:00:00	950	0.8		15									0	0		-4.272	18	0.6
2016-06-28 14:00:00	950	0.76		15										0		-4.27	18	0
2016-06-28 15:00:00	949	0.77		15										0		-4.267	18	0.1
2016-06-28 16:00:00	941	0.77		15									0	0		-4.265	19	0.2
2016-06-28 17:00:00	940	0.77		15									0	0		-4.263	19	0.3
2016-06-28 18:00:00	948	0.77		14									0	0		-4.261	19	0.4
2016-06-28 19:00:00	950	0.77		14									0	0		-4.259	19	0
2016-06-28 20:00:00	954	0.77		14									0	0		-4.258	20	0
2016-06-28 21:00:00	958	0.76		15									4.3	0		-4.242	19	0
2016-06-28 22:00:00	935	0.76		15									0	0		-4.215	20	0
2016-06-28 23:00:00	923	0.75		16									0	0		-4.208	20	0
2016-06-29	928	0.74		13									1	212.46		-4.209	19	0
2016-06-29 01:00:00	928	0.73		14									0.9	216		-4.213	19	0
2016-06-29 02:00:00	922	0.72		13									0.1	216		-4.219	19	0
2016-06-29 03:00:00	927	0.7		11										216		-4.227	19	0
2016-06-29 04:00:00	919	0.68		12									0.1	216		-4.236	19	0
2016-06-29 05:00:00	900	0.7		12										216		-4.244	18	0
2016-06-29 06:00:00	900	0.68		13										216		-4.253	18	0
2016-06-29 07:00:00	885	0.68		13									0.1	216		-4.26	18	0
2016-06-29 08:00:00	904	0.68		12									0	17.22		-4.263	18	0.1
2016-06-29 09:00:00	899	0.71		12										0		-4.262	18	0.2
2016-06-29 10:00:00	897	0.7		12									0	0	1742	-4.259	18	0.4
2016-06-29 11:00:00	900	0.7		13									0	0		-4.257	18	0.5
2016-06-29 12:00:00	899	0.69		13										0		-4.255	18	0.2	-2.1
2016-06-29 13:00:00	890	0.69		13									0	0		-4.252	18	0.9
2016-06-29 14:00:00	884	0.69		13									0	0		-4.251	19	0.9
2016-06-29 15:00:00	880	0.69		13									0	0		-4.249	19	0.7
2016-06-29 16:00:00	880	0.68		13									0	0		-4.246	20	0.6
2016-06-29 17:00:00	880	0.68		13									0	0		-4.245	20	0.6
2016-06-29 18:00:00	870	0.67		13									0	0		-4.243	21	0.4
2016-06-29 19:00:00	860	0.65		12										0		-4.242	21	0
2016-06-29 20:00:00	860	0.64		11									0.5	0		-4.241	21	0
2016-06-29 21:00:00	863	0.64		12									0.2	0		-4.239	20	0
2016-06-29 22:00:00	873	0.63		13									0.1	0		-4.238	20	0
2016-06-29 23:00:00	880	0.63		13										0		-4.237	20	0
2016-06-30	880	0.63		14										0		-4.235	19	0
2016-06-30 01:00:00	880	0.63		14										0		-4.234	19	0
2016-06-30 02:00:00	880	0.63		16									0	0		-4.233	19	0
2016-06-30 03:00:00	890	0.63		14									0	0		-4.232	19	0
2016-06-30 04:00:00	890	0.63		14									0.4	24.84		-4.23	19	0
2016-06-30 05:00:00	891	0.63		15									2.6	216		-4.231	19	0
2016-06-30 06:00:00	900	0.62		15									1.1	216		-4.232	18	0
2016-06-30 07:00:00	893	0.62		14									0.4	216		-4.235	18	0
2016-06-30 08:00:00	881	0.63		13										216		-4.239	18	0
2016-06-30 09:00:00	880	0.63		13										216		-4.244	18	0
2016-06-30 10:00:00	880	0.63		12										216	1735	-4.249	18	0.1
2016-06-30 11:00:00	880	0.65		12									0	216		-4.255	18	0.1
2016-06-30 12:00:00	880	0.66		12										198		-4.26	18	0.1	10.9
2016-06-30 13:00:00	880	0.67		12									0.6	0		-4.261	18	0
2016-06-30 14:00:00	880	0.67		12									0.6	0		-4.258	18	0.1
2016-06-30 15:00:00	880	0.67		13									0.3	0		-4.253	18	0.1
2016-06-30 16:00:00	876	0.67		13									4.1	0		-4.248	18	0
2016-06-30 17:00:00	870	0.67		13									2.5	0		-4.242	18	0.2
2016-06-30 18:00:00	870	0.66		13									0	0		-4.238	18	0.6
2016-06-30 19:00:00	869	0.66		12									0	0		-4.236	19	0.4
2016-06-30 20:00:00	860	0.65		12									0	0		-4.234	19	0.2
2016-06-30 21:00:00	860	0.64		11									0	0		-4.232	19	0
2016-06-30 22:00:00	860	0.63		11									0	0		-4.231	19	0
2016-06-30 23:00:00	860	0.63		11									0	0		-4.23	19	0
2016-07-01	870	0.63		11									0	202.08		-4.232	18	0
2016-07-01 01:00:00	877	0.63		11									0	216		-4.24	18	0
2016-07-01 02:00:00	883	0.63		14									0	216		-4.249	18	0
2016-07-01 03:00:00	890	0.64		12									0	216		-4.257	18	0
2016-07-01 04:00:00	900	0.64		12									0	216		-4.265	18	0
2016-07-01 05:00:00	900	0.67		15									0.1	216		-4.274	18	0
2016-07-01 06:00:00	900	0.7		11									0.1	216		-4.282	18	0
2016-07-01 07:00:00	904	0.72		11										216		-4.291	18	0
2016-07-01 08:00:00	906	0.75		12									0.1	10.98		-4.294	18	0
2016-07-01 09:00:00	918	0.75		12									0	0		-4.292	18	0
2016-07-01 10:00:00	920	0.73		14	870	3.6	100	5	5	0.75	1.4		0.2	0	1725	-4.289	18	0
2016-07-01 11:00:00	920	0.73		15										0		-4.286	17	0
2016-07-01 12:00:00	920	0.71		15									0	0		-4.283	17	0	7.1
2016-07-01 13:00:00	920	0.72		15									0	0		-4.28	17	0
2016-07-01 14:00:00	920	0.72		15									0	0		-4.277	17	0
2016-07-01 15:00:00	920	0.71		16									0.2	0		-4.274	17	0
2016-07-01 16:00:00	920	0.71		16									0.3	0		-4.271	17	0
2016-07-01 17:00:00	912	0.7		15									2.8	0		-4.267	18	0
2016-07-01 18:00:00	910	0.7		15										0		-4.264	18	0
2016-07-01 19:00:00	910	0.7		14									0.7	0		-4.261	18	0
2016-07-01 20:00:00	910	0.69		14									2.9	0		-4.255	17	0
2016-07-01 21:00:00	910	0.69		14									0.2	0		-4.247	17	0
2016-07-01 22:00:00	902	0.69		14									0.2	0		-4.243	17	0
2016-07-01 23:00:00	900	0.68		14									0	0		-4.24	17	0
2016-07-02	900	0.68		14									0.1	0		-4.238	17	0
2016-07-02 01:00:00	903	0.68		14										0		-4.236	17	0
2016-07-02 02:00:00	909	0.68		14									0	0		-4.235	17	0
2016-07-02 03:00:00	910	0.68		14									0	0		-4.234	17	0
2016-07-02 04:00:00	901	0.68		14									0	0		-4.232	17	0
2016-07-02 05:00:00	900	0.69		14									0	0		-4.231	17	0
2016-07-02 06:00:00	900	0.69		14									0	158.1		-4.231	17	0
2016-07-02 07:00:00	900	0.69		14									0	216		-4.236	17	0.5
2016-07-02 08:00:00	893	0.7		13									0	216		-4.242	17	1
2016-07-02 09:00:00	890	0.69		12									0	216		-4.248	17	0.7
2016-07-02 10:00:00	890	0.69		13									0	216	3593	-4.254	17	1
2016-07-02 11:00:00	897	0.69		13									0	216		-4.26	17	1
2016-07-02 12:00:00	900	0.7		13									0	216		-4.266	17	0.9	-4.2
2016-07-02 13:00:00	900	0.71		13									0	216		-4.272	18	0.9
2016-07-02 14:00:00	900	0.72		13									0.1	216		-4.274	18	0.6
2016-07-02 15:00:00	900	0.72		13										216		-4.274	18	0.8
2016-07-02 16:00:00	893	0.72		14									0	216		-4.277	19	0.9
2016-07-02 17:00:00	880	0.72		14									0	216		-4.282	19	0.9
2016-07-02 18:00:00	880	0.71		14									0	216		-4.288	19	1
2016-07-02 19:00:00	880	0.7		13									0	216		-4.293	20	1
2016-07-02 20:00:00	880	0.71		9									0	216		-4.299	19	0.8
2016-07-02 21:00:00	880	0.68		12									0	216		-4.305	19	0.8
2016-07-02 22:00:00	890	0.68		13									0	194.4		-4.31	19	0
2016-07-02 23:00:00	898	0.67		13									0	0		-4.311	19	0
2016-07-03	905	0.67		14									0	0		-4.308	18	0
2016-07-03 01:00:00	910	0.66		16									0	0		-4.306	18	0
2016-07-03 02:00:00	910	0.67		16									2.6	0		-4.303	18	0
2016-07-03 03:00:00	917	0.67		16									8.2	0		-4.293	18	0
2016-07-03 04:00:00	901	0.67		18									0.5	0		-4.269	18	0
2016-07-03 05:00:00	902	0.68		17										0		-4.259	17	0
2016-07-03 06:00:00	910	0.69		16									0	0		-4.255	17	0
2016-07-03 07:00:00	910	0.69		17									0.3	0		-4.252	17	0.3
2016-07-03 08:00:00	911	0.7		18									0	0		-4.25	17	0.5
2016-07-03 09:00:00	917	0.71		19									0	0		-4.249	17	0.2
2016-07-03 10:00:00	920	0.7		19									0	0	0	-4.247	17	0.6
2016-07-03 11:00:00	922	0.7		18									0	0		-4.246	17	0.9
2016-07-03 12:00:00	929	0.7		18									0	0		-4.244	18	1	7.4
2016-07-03 13:00:00	920	0.7		18									0	0		-4.243	18	0.8
2016-07-03 14:00:00	920	0.7		15									0	0		-4.242	19	0.9
2016-07-03 15:00:00	920	0.69		14									0	0		-4.24	20	1
2016-07-03 16:00:00	920	0.68		14									0	0		-4.239	20	0.9
2016-07-03 17:00:00	920	0.68		14									0	0		-4.238	20	0.9
2016-07-03 18:00:00	920	0.68		13									0	0		-4.236	21	1
2016-07-03 19:00:00	920	0.68		14									0	0		-4.235	21	1
2016-07-03 20:00:00	920	0.68		13									0	0		-4.234	21	1
2016-07-03 21:00:00	920	0.67		13									0	0		-4.233	20	1
2016-07-03 22:00:00	922	0.66		13									0	0		-4.232	20	0.2
2016-07-03 23:00:00	932	0.66		14									0	0		-4.231	20	0
2016-07-04	940	0.66		14									0	125.76		-4.232	19	0
2016-07-04 01:00:00	940	0.65		16									0	216		-4.239	19	0
2016-07-04 02:00:00	940	0.63		16									0	216		-4.247	19	0
2016-07-04 03:00:00	940	0.63		13									0	216		-4.256	19	0
2016-07-04 04:00:00	940	0.63		13									0	216		-4.264	18	0
2016-07-04 05:00:00	940	0.62		12									0	216		-4.273	18	0
2016-07-04 06:00:00	940	0.61		12									0	216		-4.282	18	0
2016-07-04 07:00:00	940	0.62		12									0	216		-4.291	18	1
2016-07-04 08:00:00	940	0.63		11									0	14.88		-4.294	18	1
2016-07-04 09:00:00	940	0.65		11									0	0		-4.292	18	1
2016-07-04 10:00:00	940	0.65		12									0	0	1653	-4.29	18	0.9
2016-07-04 11:00:00	940	0.65		12									0	0		-4.287	18	0.9
2016-07-04 12:00:00	943	0.65		12									0	0		-4.284	18	1	-4.5
2016-07-04 13:00:00	941	0.65		12									0	0		-4.282	19	1
2016-07-04 14:00:00	940	0.65		12									0	0		-4.279	19	0.6
2016-07-04 15:00:00	940	0.65		13									0	0		-4.277	19	0.5
2016-07-04 16:00:00	940	0.65		13									0	0		-4.275	21	0.5
2016-07-04 17:00:00	947	0.66		13									0	0		-4.273	20	0.9
2016-07-04 18:00:00	957	0.66		13									0	0		-4.27	21	0.8
2016-07-04 19:00:00	950	0.66		20									0	0		-4.269	21	1
2016-07-04 20:00:00	951	0.64		16									0	0		-4.267	21	1
2016-07-04 21:00:00	960	0.64		15									0	0		-4.265	21	1
2016-07-04 22:00:00	960	0.62		20									0	0		-4.263	20	0.3
2016-07-04 23:00:00	960	0.61		20									0	0		-4.261	20	0
2016-07-05	960	0.6		18									0	0		-4.26	20	0
2016-07-05 01:00:00	960	0.59		17									0	0		-4.258	20	0
2016-07-05 02:00:00	960	0.6		17									0	0		-4.257	20	0
2016-07-05 03:00:00	960	0.6		16									0	0		-4.256	19	0
2016-07-05 04:00:00	960	0.6		15									0	0		-4.254	19	0
2016-07-05 05:00:00	959	0.6		15									0	0		-4.253	19	0
2016-07-05 06:00:00	960	0.6		15										0		-4.251	19	0
2016-07-05 07:00:00	960	0.6		15										0		-4.25	19	0
2016-07-05 08:00:00	960	0.61		16									0	0		-4.249	19	0
2016-07-05 09:00:00	960	0.6		15										0		-4.247	19	0
2016-07-05 10:00:00	960	0.61		15									0.7	0	0	-4.246	18	0
2016-07-05 11:00:00	960	0.61		15									0.1	0		-4.244	18	0.1
2016-07-05 12:00:00	960	0.61		15									0	0		-4.242	18	0.1	-0.8
2016-07-05 13:00:00	960	0.6		14									0.1	0		-4.241	18	0
2016-07-05 14:00:00	960	0.6		14										0		-4.24	18	0
2016-07-05 15:00:00	960	0.62		14										0		-4.238	18	0.2
2016-07-05 16:00:00	960	0.6		16									0	0		-4.238	18	0.2
2016-07-05 17:00:00	960	0.6		13									0	0		-4.236	18	0.1
2016-07-05 18:00:00	960	0.6		13									0	0		-4.235	18	0.5
2016-07-05 19:00:00	960	0.6		13									0	0		-4.234	18	0.6
2016-07-05 20:00:00	960	0.6		13									0	0		-4.233	18	0.8
2016-07-05 21:00:00	960	0.6		12									0	0		-4.232	18	0.7
2016-07-05 22:00:00	960	0.59		13									0	0		-4.231	18	0.3
2016-07-05 23:00:00	960	0.59		12									0	0		-4.23	18	0
2016-07-06	960	0.59		12									0	210.42		-4.234	18	0
2016-07-06 01:00:00	960	0.6		12									0	216		-4.243	18	0
2016-07-06 02:00:00	963	0.61		13										216		-4.251	18	0
2016-07-06 03:00:00	972	0.6		13									0.5	216		-4.26	18	0
2016-07-06 04:00:00	980	0.62		13										216		-4.269	18	0
2016-07-06 05:00:00	980	0.64		13									0	216		-4.278	18	0
2016-07-06 06:00:00	980	0.65		13									0	216		-4.287	18	0
2016-07-06 07:00:00	980	0.66		13									0	216		-4.296	17	1
2016-07-06 08:00:00	980	0.68		13									0	3.78		-4.299	17	1
2016-07-06 09:00:00	980	0.69		13									0	0		-4.298	17	1
2016-07-06 10:00:00	980	0.68		14									0	0	1726	-4.296	17	0.8
2016-07-06 11:00:00	980	0.68		15									0	0		-4.293	17	0.8
2016-07-06 12:00:00	980	0.67		15									0	0		-4.291	18	0.9	-3.8
2016-07-06 13:00:00	980	0.68		15									0	0		-4.288	18	0.8
2016-07-06 14:00:00	985	0.7		15									0	0		-4.286	19	0.8
2016-07-06 15:00:00	990	0.71		15									0	0		-4.284	20	1
2016-07-06 16:00:00	990	0.71		16									0	0		-4.281	20	1
2016-07-06 17:00:00	990	0.7		15									0	0		-4.279	21	1
2016-07-06 18:00:00	990	0.69		15									0	0		-4.277	21	0.9
2016-07-06 19:00:00	1000	0.69		15									0	0		-4.276	21	0.5
2016-07-06 20:00:00	1000	0.68		13									0	0		-4.274	21	0.1
2016-07-06 21:00:00	1000	0.67		15									0	0		-4.272	20	0.8
2016-07-06 22:00:00	1000	0.67		16									0	0		-4.27	20	0.3
2016-07-06 23:00:00	1008	0.68		16									0	0		-4.269	20	0
2016-07-07	1010	0.67		18									0	0		-4.267	19	0
2016-07-07 01:00:00	1010	0.65		17									0	0		-4.265	19	0
2016-07-07 02:00:00	1010	0.65		19									0	0		-4.264	19	0
2016-07-07 03:00:00	1010	0.65		17									0	0		-4.263	19	0
2016-07-07 04:00:00	1010	0.65		17									0	0		-4.261	19	0
2016-07-07 05:00:00	1010	0.65		17									0	0		-4.26	18	0
2016-07-07 06:00:00	1010	0.65		17									0	0		-4.259	18	0.2
2016-07-07 07:00:00	1010	0.65		18									0	0		-4.258	18	1
2016-07-07 08:00:00	1010	0.65		18									0	0		-4.257	18	0.3
2016-07-07 09:00:00	1010	0.65		18									0	0		-4.255	18	0.5
2016-07-07 10:00:00	1012	0.65		18									0	0	0	-4.254	18	0.1
2016-07-07 11:00:00	1020	0.64		18									0	0		-4.253	18	0.4
2016-07-07 12:00:00	1020	0.64		18									0	0		-4.252	18	0.6	-3.5
2016-07-07 13:00:00	1020	0.63		18									0	0		-4.251	18	0.4
2016-07-07 14:00:00	1020	0.62		18									0	0		-4.25	19	0.4
2016-07-07 15:00:00	1020	0.6		17									0	0		-4.249	19	0.4
2016-07-07 16:00:00	1020	0.59		15									0	0		-4.249	19	0.2
2016-07-07 17:00:00	1023	0.59		15									0	0		-4.248	20	0.3
2016-07-07 18:00:00	1030	0.59		14									0	0		-4.247	21	0.1
2016-07-07 19:00:00	1030	0.6		14									0	0		-4.246	21	0.5
2016-07-07 20:00:00	1030	0.6		12									0	0		-4.245	21	0.4
2016-07-07 21:00:00	1031	0.59		12									0	0		-4.244	21	0.5
2016-07-07 22:00:00	1040	0.59		12									0	0		-4.243	20	0.3
2016-07-07 23:00:00	1040	0.6		12									0	0		-4.242	20	0
2016-07-08	1040	0.59		13									0	0		-4.241	20	0
2016-07-08 01:00:00	1040	0.58		14									0	0		-4.24	20	0
2016-07-08 02:00:00	1042	0.58		14									0	0		-4.239	20	0
2016-07-08 03:00:00	1048	0.58		14									0	0		-4.238	19	0
2016-07-08 04:00:00	1050	0.58		14									0	0		-4.237	19	0
2016-07-08 05:00:00	1050	0.58		16									0	0		-4.236	19	0
2016-07-08 06:00:00	1050	0.58		15									0	0		-4.235	19	0
2016-07-08 07:00:00	1050	0.59		15									0	0		-4.234	19	0
2016-07-08 08:00:00	1050	0.59		16									0	0		-4.233	19	0
2016-07-08 09:00:00	1050	0.58		15									0	0		-4.232	19	0
2016-07-08 10:00:00	1050	0.59		15										0	0	-4.231	19	0
2016-07-08 11:00:00	1050	0.58		15										0		-4.23	19	0
2016-07-08 12:00:00	1050	0.58		15									0	0		-4.229	19	0	0.1
2016-07-08 13:00:00	1050	0.57		15									1.4	0		-4.227	18	0
2016-07-08 14:00:00	1050	0.59		15									0.6	0		-4.224	18	0
2016-07-08 15:00:00	1050	0.59		15									0	0		-4.222	18	0
2016-07-08 16:00:00	1050	0.57		22									0	0		-4.221	18	0.1
2016-07-08 17:00:00	1045	0.56		13									0	0		-4.22	19	1
2016-07-08 18:00:00	1040	0.57		12									0	0		-4.219	19	1
2016-07-08 19:00:00	1040	0.56		12									0	0		-4.218	20	0.5
2016-07-08 20:00:00	1040	0.56	3.06	10									0	0		-4.217	19	0.3
2016-07-08 21:00:00	1040	0.56	3.1	11									0	0		-4.217	19	0
2016-07-08 22:00:00	1040	0.56	3.07	11									0	0		-4.216	19	0
2016-07-08 23:00:00	1045	0.57	3.03	11									0	0		-4.215	19	0
2016-07-09	1050	0.57	3.03	12									0	207.72		-4.217	19	0
2016-07-09 01:00:00	1050	0.58	2.97	12									0	216		-4.223	19	0
2016-07-09 02:00:00	1050	0.57	2.88	13									0	216		-4.23	19	0
2016-07-09 03:00:00	1050	0.55	2.89	13									0	216		-4.236	19	0
2016-07-09 04:00:00	1054	0.54	2.9	11									0	216		-4.243	19	0
2016-07-09 05:00:00	1052	0.54	2.94	11									0	216		-4.249	19	0
2016-07-09 06:00:00	1050	0.54	2.96	10									0	216		-4.256	18	0
2016-07-09 07:00:00	1051	0.55	2.98	10									0	216		-4.262	18	0.2
2016-07-09 08:00:00	1059	0.56	2.97	10									0	216		-4.269	18	0.1
2016-07-09 09:00:00	1060	0.57	3.04	10									0	216		-4.275	18	0.5
2016-07-09 10:00:00	1060	0.58	3.11	10									0	216	3325	-4.282	18	0.6
2016-07-09 11:00:00	1060	0.59	3.13	10									0	216		-4.288	18	0.5
2016-07-09 12:00:00	1060	0.61	3.17	18									0	216		-4.295	19	0.6	-3.1
2016-07-09 13:00:00	1053	0.59	3.22	10									0	216		-4.301	19	0.5
2016-07-09 14:00:00	1050	0.62	3.24	10									0	216		-4.307	20	0.1
2016-07-09 15:00:00	1041	0.59	3.26	10									0	93.6		-4.311	20	0.1
2016-07-09 16:00:00	1048	0.58	3.28	11										0		-4.311	20	0
2016-07-09 17:00:00	1050	0.58	3.32	11										0		-4.308	20	0.1
2016-07-09 18:00:00	1060	0.58	3.28	13									0	0		-4.306	20	0.5
2016-07-09 19:00:00	1060	0.6	3.26	13									0	0		-4.303	20	0.2
2016-07-09 20:00:00	1060	0.58	3.18	16									0	0		-4.3	20	0
2016-07-09 21:00:00	1053	0.56	3.23	14									0	0		-4.298	20	0
2016-07-09 22:00:00	1059	0.56	3.27	12									0	0		-4.296	20	0
2016-07-09 23:00:00	1060	0.56	3.28	13									0	0		-4.293	20	0
2016-07-10	1060	0.56	3.28	13									0	0		-4.291	20	0
2016-07-10 01:00:00	1060	0.56	3.18	13									0	0		-4.289	19	0
2016-07-10 02:00:00	1060	0.56	3.02	13									0	0		-4.287	19	0
2016-07-10 03:00:00	1060	0.56	3.07	13									0	0		-4.284	19	0
2016-07-10 04:00:00	1060	0.56	3.08	39									0	0		-4.282	19	0
2016-07-10 05:00:00	1060	0.56	3.05	14									0	0		-4.281	19	0
2016-07-10 06:00:00	1060	0.56	3.04	13									0	0		-4.278	19	0
2016-07-10 07:00:00	1060	0.56	3.08	13									0	0		-4.277	19	0.2
2016-07-10 08:00:00	1060	0.57	3.12	14									0	0		-4.275	19	0.2
2016-07-10 09:00:00	1060	0.6	3.09	14									0	0		-4.274	19	0
2016-07-10 10:00:00	1060	0.58	3.07	15									0	0	0	-4.272	19	0.5
2016-07-10 11:00:00	1060	0.57	3.06	14									0	0		-4.27	19	0.6
2016-07-10 12:00:00	1068	0.56	3.08	14									0	0		-4.269	19	0.6	-4
2016-07-10 13:00:00	1070	0.56	3.1	14									0	0		-4.268	19	0.9
2016-07-10 14:00:00	1070	0.57	3.1	14									0	0		-4.267	20	0.8
2016-07-10 15:00:00	1073	0.56	3.13	14									0	0		-4.266	22	0.7
2016-07-10 16:00:00	1077	0.55	3.24	14									0				22	0.7
2016-07-10 17:00:00	1079	0.55	3.37	11									0	0		-4.264	23	0.3
2016-07-10 18:00:00	1080	0.55	3.41	12									0	0		-4.263	23	0
2016-07-10 19:00:00	1080	0.56	3.34	13									0	0		-4.262	23	0.5
2016-07-10 20:00:00	1086	0.6	3.23	13									0	0		-4.261	23	0.2
2016-07-10 21:00:00	1090	0.56	3.14	14									0	0		-4.26	22	0
2016-07-10 22:00:00	1090	0.54	3.14	12										0		-4.259	22	0
2016-07-10 23:00:00	1090	0.53	3.12	12									0	0		-4.258	22	0
2016-07-11	1099	0.52	3.15	12						0.516			0	0		-4.257	22	0
2016-07-11 01:00:00	1100	0.51	3.05	14									0	0		-4.256	21	0
2016-07-11 02:00:00	1098	0.51	3.03	12									0	0		-4.255	21	0
2016-07-11 03:00:00	1099	0.51	3.01	17									0	0		-4.254	21	0
2016-07-11 04:00:00	1100	0.52	3.02	13									0	0		-4.253	21	0
2016-07-11 05:00:00	1100	0.52	3.02	15									0	0		-4.252	20	0
2016-07-11 06:00:00	1100	0.52	2.99	13									0	0		-4.251	20	0
2016-07-11 07:00:00	1100	0.53	2.95	14									0	0		-4.25	20	0
2016-07-11 08:00:00	1100	0.54	2.94	15									0	0		-4.249	20	0.3
2016-07-11 09:00:00	1100	0.53	2.94	15									0	0		-4.248	20	0.2
2016-07-11 10:00:00	1100	0.54	2.93	16	1093		124				2.91	1.2	0	0	0	-4.248	19	0
2016-07-11 11:00:00	1103	0.54	2.91	17									0	0		-4.247	19	0.1
2016-07-11 12:00:00	1101	0.54	2.88	15									0	0		-4.246	19	0	-3.1
2016-07-11 13:00:00	1110	0.54	2.86	15									0	0		-4.246	19	0.1
2016-07-11 14:00:00	1110	0.52	2.89	17									0	0		-4.245	19	0.3
2016-07-11 15:00:00	1103	0.51	2.92	15									0	0		-4.244	20	0.5
2016-07-11 16:00:00	1093	0.51	2.91	14									0	0		-4.243	20	0.8
2016-07-11 17:00:00	1090	0.51	2.98	13									0	0		-4.243	20	1
2016-07-11 18:00:00	1090	0.51	3	12									0	0		-4.242	21	1
2016-07-11 19:00:00	1099	0.51	3.11	11									0	0		-4.241	21	1
2016-07-11 20:00:00	1100	0.52	3.12	11									0	0		-4.241	21	1
2016-07-11 21:00:00	1098	0.52	3.11	9									0	0		-4.24	21	0.5
2016-07-11 22:00:00	1100	0.52	3.13	12									0	0		-4.239	20	0
2016-07-11 23:00:00	1100	0.51	3.07	12									0	0		-4.238	20	0
2016-07-12	1100	0.51	3.01	12									0	0		-4.238	20	0
2016-07-12 01:00:00	1100	0.51	2.88	15									0	0		-4.236	20	0
2016-07-12 02:00:00	1100	0.51	2.81	15									0	0		-4.236	20	0
2016-07-12 03:00:00	1080	0.51	2.95	14									0	0		-4.235	20	0
2016-07-12 04:00:00	1073	0.52	3.04	15									0.7	0		-4.234	19	0
2016-07-12 05:00:00	1100	0.51	3.01	14									0	0		-4.233	19	0
2016-07-12 06:00:00	1100	0.52	2.98	14									0	0		-4.232	19	0
2016-07-12 07:00:00	1100	0.52	2.96	18									0	0		-4.232	19	0
2016-07-12 08:00:00	1100	0.52	2.94	14									0	0		-4.231	19	0
2016-07-12 09:00:00	1100	0.52	2.89	14									0	0		-4.23	19	0.4
2016-07-12 10:00:00	1100	0.52	2.9	14									0	0	0	-4.23	19	0.7
2016-07-12 11:00:00	1099	0.53	2.91	14									0	0		-4.229	19	0.9
2016-07-12 12:00:00	1103	0.53	2.93	15									0	0		-4.228	20	0.7	-2.7
2016-07-12 13:00:00	1120	0.54	2.96	14									0	0		-4.228	20	0.9
2016-07-12 14:00:00	1120	0.52	3.1	12									0	0		-4.227	21	0.4
2016-07-12 15:00:00	1120	0.52	3.19	12									0	0		-4.226	21	0.1
2016-07-12 16:00:00	1120	0.52	3.16	12									0	0		-4.226	21	0.5
2016-07-12 17:00:00	1120	0.52	3.14	11									0	0		-4.225	21	0.4
2016-07-12 18:00:00	1120	0.52	3.13	11									0	0		-4.225	22	0.4
2016-07-12 19:00:00	1120	0.52	3.11	12									0	0		-4.224	22	0.9
2016-07-12 20:00:00	1120	0.52	3.07	11									0	0		-4.224	21	0.7
2016-07-12 21:00:00	1120	0.52	3.06	10									0	0		-4.223	21	0.7
2016-07-12 22:00:00	1123	0.51	3.07	15									0	0		-4.222	21	0.3
2016-07-12 23:00:00	1130	0.5	3.09	10									0	0		-4.222	21	0
2016-07-13	1130	0.51	3.11	10									0	203.64		-4.226	21	0
2016-07-13 01:00:00	1131	0.5	3.04	11									0	216		-4.234	20	0
2016-07-13 02:00:00	1139	0.5	2.93	12									0	216		-4.243	20	0
2016-07-13 03:00:00	1140	0.49	3.04	11									0	216		-4.253	20	0
2016-07-13 04:00:00	1148	0.49	3.17	10									0	216		-4.262	20	0
2016-07-13 05:00:00	1150	0.5	3.26	9									0.1	216		-4.27	20	0
2016-07-13 06:00:00	1150	0.51	3.29	9										216		-4.28	19	0
2016-07-13 07:00:00	1150	0.53	3.28	9										216		-4.289	19	0
2016-07-13 08:00:00	1155	0.55	3.33	9									0	9.78		-4.292	19	0
2016-07-13 09:00:00	1160	0.57	3.31	10									0.2	0		-4.292	19	0
2016-07-13 10:00:00	1160	0.58	3.33	11										0	1725	-4.29	19	0.1
2016-07-13 11:00:00	1158	0.58	3.12	12									0.7	0		-4.287	19	0.6
2016-07-13 12:00:00	1158	0.57	3.1	12										0		-4.284	19	0.4	-2
2016-07-13 13:00:00	1152	0.56	3.11	11									0	0		-4.282	19	0.2
2016-07-13 14:00:00	1153	0.57	3.09	12									0	0		-4.279	19	0.8
2016-07-13 15:00:00	1159	0.57	3.04	12									0	0		-4.277	20	0.2
2016-07-13 16:00:00	1160	0.56	3.09	12									0	0		-4.276	20	0.1
2016-07-13 17:00:00	1159	0.56	3.17	11									0	0		-4.274	20	0.5
2016-07-13 18:00:00	1155	0.57	3.17	12									0	0		-4.272	20	1
2016-07-13 19:00:00	1148	0.56	3.1	13									0	0		-4.27	20	1
2016-07-13 20:00:00	1150	0.56	3.04	9									0	0		-4.269	20	1
2016-07-13 21:00:00	1150	0.56	3.15	11									0	0		-4.268	20	0.8
2016-07-13 22:00:00	1150	0.55	3.13	11									0	0		-4.266	20	0.2
2016-07-13 23:00:00	1144	0.55	3.08	11									0	0		-4.265	20	0
2016-07-14	1140	0.55	3.07	11									0	0		-4.263	19	0
2016-07-14 01:00:00	1142	0.55	3.01	11									0	0		-4.262	19	0
2016-07-14 02:00:00	1148	0.56	3.08	11									0	0		-4.261	19	0
2016-07-14 03:00:00	1150	0.56	3.09	11									0	0		-4.26	19	0
2016-07-14 04:00:00	1151	0.57	3.15	12									0	0		-4.259	19	0
2016-07-14 05:00:00	1160	0.57	3.09	13									0	0		-4.258	18	0
2016-07-14 06:00:00	1160	0.58	3.16	13									0	0		-4.257	18	0
2016-07-14 07:00:00	1158	0.58	3.15	13									0	0		-4.256	18	0
2016-07-14 08:00:00	1160	0.6	3.11	22									0	0		-4.255	18	0.7
2016-07-14 09:00:00	1160	0.59	3.06	15									0	0		-4.254	18	0.8
2016-07-14 10:00:00	1160	0.58	2.96	17									0	0	0	-4.253	18	0.5
2016-07-14 11:00:00	1160	0.58	2.89	15									0	0		-4.252	18	0.8
2016-07-14 12:00:00	1160	0.57	2.9	19									0	0		-4.252	18	0.9	-3.6
2016-07-14 13:00:00	1168	0.59	2.93	15									0				19	0.8
2016-07-14 14:00:00	1170	0.57	2.93	14									0	0		-4.25	19	0.7
2016-07-14 15:00:00	1178	0.58	2.98	13									0	0		-4.25	20	0.9
2016-07-14 16:00:00	1178	0.59	3.02	13									0	0		-4.249	20	0.6
2016-07-14 17:00:00	1178	0.58	3.04	13									0	0		-4.249	20	0.2
2016-07-14 18:00:00	1163	0.58	3.1	13									0	0		-4.248	20	1
2016-07-14 19:00:00	1160	0.57	3.15	12									0	0		-4.247	20	0.6
2016-07-14 20:00:00	1158	0.56	3.08	14									0	0		-4.247	20	0.9
2016-07-14 21:00:00	1160	0.56	3.16	15									0	0		-4.246	20	1
2016-07-14 22:00:00	1160	0.55	3.13	12									0	0		-4.245	20	0.3
2016-07-14 23:00:00	1160	0.55	3.11	12									0	0		-4.245	20	0
2016-07-15	1160	0.55	3.11	12									0	0		-4.244	19	0
2016-07-15 01:00:00	1155	0.55	2.98	12									0	0		-4.243	19	0
2016-07-15 02:00:00	1160	0.55	2.98	12									0	0		-4.242	19	0
2016-07-15 03:00:00	1160	0.55	2.99	12									0	0		-4.242	19	0
2016-07-15 04:00:00	1158	0.55	2.99	30									0	0		-4.241	19	0
2016-07-15 05:00:00	1158	0.55	2.96	15									0	0		-4.24	18	0
2016-07-15 06:00:00	1155	0.55	2.96	13									0	0		-4.239	18	0
2016-07-15 07:00:00	1160	0.56	2.94	13									0	0		-4.239	18	0.2
2016-07-15 08:00:00	1160	0.57	2.92	14									0	0		-4.238	18	0.3
2016-07-15 09:00:00	1160	0.56	2.93	14									0	0		-4.238	18	0.4
2016-07-15 10:00:00	1168	0.55	2.89	14									0	0	0	-4.237	18	0.4
2016-07-15 11:00:00	1170	0.56	2.83	14									0	0		-4.236	18	0.3
2016-07-15 12:00:00	1180	0.55	2.78	15									0	0		-4.236	18	0.2	-4
2016-07-15 13:00:00	1180	0.55	2.79	14									0	0		-4.235	18	0.7
2016-07-15 14:00:00	1188	0.54	2.8	14									0	0		-4.235	19	0.9
2016-07-15 15:00:00	1190	0.54	2.78	12									0	0		-4.234	20	0.7
2016-07-15 16:00:00	1190	0.56	2.84	12									0	0		-4.234	20	1
2016-07-15 17:00:00	1190	0.56	2.95	12									0	0		-4.233	21	1
2016-07-15 18:00:00	1190	0.56	2.96	11									0	0		-4.233	21	1
2016-07-15 19:00:00	1190	0.57	2.95	11									0	0		-4.232	21	0.9
2016-07-15 20:00:00	1183	0.56	2.93	10									0	0		-4.232	21	0.5
2016-07-15 21:00:00	1180	0.55	3.01	11									0	0		-4.231	21	0.7
2016-07-15 22:00:00	1180	0.54	3.05	11									0	0		-4.231	20	0.3
2016-07-15 23:00:00	1176	0.54	3.05	11									0	0		-4.23	20	0
2016-07-16	1178	0.54	3.01	11									0	205.74		-4.234	20	0
2016-07-16 01:00:00	1180	0.55	3.05	52									0	216		-4.243	20	0
2016-07-16 02:00:00	1180	0.51	2.96	16									0	216		-4.252	20	0
2016-07-16 03:00:00	1180	0.5	2.98	34									0	216		-4.262	19	0
2016-07-16 04:00:00	1180	0.5	3.24	72									0	216		-4.271	19	0
2016-07-16 05:00:00	1180	0.49	3.32	9									0	216		-4.281	19	0
2016-07-16 06:00:00	1180	0.5	3.33	11									0	216		-4.29	19	0
2016-07-16 07:00:00	1180	0.51	3.35	9									0	216		-4.299	19	0
2016-07-16 08:00:00	1180	0.52	3.38	7									0	216		-4.308	19	0
2016-07-16 09:00:00	1180	0.53	3.39	7									0	28.8		-4.313	19	0
2016-07-16 10:00:00	1180	0.53	3.37	7									0	0	1963	-4.312	19	0
2016-07-16 11:00:00	1182	0.54	3.3	9									0	0		-4.31	19	0
2016-07-16 12:00:00	1190	0.54	3.09	15									0	0		-4.308	19	0	-2
2016-07-16 13:00:00	1193	0.54	3.15	10									0	0		-4.306	19	0
2016-07-16 14:00:00	1200	0.56	3.21	11									0	0		-4.303	19	0
2016-07-16 15:00:00	1209	0.56	3.2	11									0	0		-4.301	19	0
2016-07-16 16:00:00	1210	0.56	3.25	11									0	0		-4.299	20	0
2016-07-16 17:00:00	1210	0.57	3.23	11									0	0		-4.297	20	0.2
2016-07-16 18:00:00	1210	0.56	3.18	11									0	0		-4.295	20	0
2016-07-16 19:00:00	1210	0.56	3.11	11									0	0		-4.292	20	0.3
2016-07-16 20:00:00	1210	0.56	3.28	11									0	0		-4.29	20	0.4
2016-07-16 21:00:00	1210	0.55	3.32	11									0	0		-4.288	20	0.3
2016-07-16 22:00:00	1210	0.55	3.21	12									0	0		-4.287	20	0
2016-07-16 23:00:00	1210	0.55	3.22	12										0		-4.285	20	0
2016-07-17	1210	0.55	3.24	11									0	0		-4.283	20	0
2016-07-17 01:00:00	1210	0.55	3.13	24										0		-4.281	20	0
2016-07-17 02:00:00	1210	0.55	2.81	12									0.1	0		-4.279	20	0
2016-07-17 03:00:00	1210	0.54	3.11	12									0	0		-4.277	20	0
2016-07-17 04:00:00	1208	0.54	3.1	11										0		-4.276	20	0
2016-07-17 05:00:00	1203	0.54	3.08	11									0.3	0		-4.274	19	0
2016-07-17 06:00:00	1210	0.54	3.04	12										0		-4.273	19	0
2016-07-17 07:00:00	1210	0.54	3.05	11										0		-4.272	19	0
2016-07-17 08:00:00	1210	0.55	3.05	16									0	0		-4.271	19	0.1
2016-07-17 09:00:00	1210	0.55	3.08	11									0	0		-4.27	19	1
2016-07-17 10:00:00	1210	0.55	3.05	21									0	0	0	-4.269	19	0.6
2016-07-17 11:00:00	1210	0.55	3.03	11									0	0		-4.269	19	0.5
2016-07-17 12:00:00	1210	0.55	3.06	12									0	0		-4.268	20	0.4	-3.7
2016-07-17 13:00:00	1220	0.55	3.05	13									0	0		-4.267	20	0.8
2016-07-17 14:00:00	1220	0.54	2.88	11									0	0		-4.266	21	1
2016-07-17 15:00:00	1220	0.53	2.89	11									0	0		-4.266	21	0.6
2016-07-17 16:00:00	1220	0.52	2.87	10									0	0		-4.265	22	0.5
2016-07-17 17:00:00	1223	0.54	2.91	10									0	0		-4.264	22	0.4
2016-07-17 18:00:00	1224	0.55	3	12									0	0		-4.264	22	1
2016-07-17 19:00:00	1226	0.53	2.99	13									0	0		-4.263	22	0.7
2016-07-17 20:00:00	1229	0.53	2.86	11									0	0		-4.262	22	0.8
2016-07-17 21:00:00	1223	0.52	2.95	13									0	0		-4.261	22	1
2016-07-17 22:00:00	1220	0.52	3	11									0	0		-4.261	22	0
2016-07-17 23:00:00	1220	0.52	2.96	11									0	0		-4.26	22	0
2016-07-18	1220	0.51	2.97	13									0	0		-4.259	21	0
2016-07-18 01:00:00	1220	0.51	3.04	12									0	0		-4.258	21	0
2016-07-18 02:00:00	1220	0.51	2.86	12									0	0		-4.258	21	0
2016-07-18 03:00:00	1220	0.51	2.84	13									0	0		-4.257	21	0
2016-07-18 04:00:00	1220	0.51	2.85	12									0	0		-4.256	21	0
2016-07-18 05:00:00	1220	0.51	2.9	14									0	0		-4.255	20	0
2016-07-18 06:00:00	1220	0.51	2.83	14									0	0		-4.255	20	0
2016-07-18 07:00:00	1220	0.51	2.76	15									0	0		-4.254	20	0.2
2016-07-18 08:00:00	1220	0.54	2.76	13									0	0		-4.253	20	0.4
2016-07-18 09:00:00	1220	0.54	2.79	13									0	0		-4.252	20	0.5
2016-07-18 10:00:00	1220	0.53	2.77	13									0	0	0	-4.252	20	1
2016-07-18 11:00:00	1220	0.54	2.79	13									0	0		-4.251	20	1
2016-07-18 12:00:00	1218	0.54	2.8	20									0	0		-4.25	20	1	-5
2016-07-18 13:00:00	1224	0.54	2.82	23									0	0		-4.25	21	1
2016-07-18 14:00:00	1224	0.52	2.74	13									0	0		-4.249	22	1
2016-07-18 15:00:00	1229		2.7	13									0	0		-4.249	22	1
2016-07-18 16:00:00	1230		2.77	16									0	0		-4.249	23	1
2016-07-18 17:00:00	1230		2.89	19									0	0		-4.248	23	1
2016-07-18 18:00:00	1230		2.9	22									0	0		-4.247	23	1
2016-07-18 19:00:00	1236		2.88	25									0	0		-4.247	23	1
2016-07-18 20:00:00	1240		2.85	27									0	0		-4.247	23	1
2016-07-18 21:00:00	1240		2.82	28									0	0		-4.246	23	1
2016-07-18 22:00:00	1238		2.71	28									0	0		-4.246	23	0.2
2016-07-18 23:00:00	1227		2.54	28									0	0		-4.245	22	0
2016-07-19	1229		2.51	27									0	0		-4.244	22	0
2016-07-19 01:00:00	1230		2.83	24									0	0		-4.244	22	0
2016-07-19 02:00:00	1230		2.84	20									0	0		-4.243	22	0
2016-07-19 03:00:00	1230		2.69	15									0	0		-4.243	21	0
2016-07-19 04:00:00	1230		2.63	10									0	0		-4.242	21	0
2016-07-19 05:00:00	1230		2.66	11									0	0		-4.241	21	0
2016-07-19 06:00:00	1230		2.68	14									0	0		-4.241	21	0
2016-07-19 07:00:00	1230		2.68	10									0	0		-4.24	20	0.7
2016-07-19 08:00:00	1230		2.67	11									0	0		-4.239	20	1
2016-07-19 09:00:00	1230		2.71	12									0	0		-4.239	20	1
2016-07-19 10:00:00	1230		2.64	13									0	0	0	-4.238	20	1
2016-07-19 11:00:00	1229		2.72	12									0	0		-4.238	20	1
2016-07-19 12:00:00	1230		2.71	12									0	0		-4.238	20	1	-5.2
2016-07-19 13:00:00	1230		2.68	12									0	0		-4.237	21	1
2016-07-19 14:00:00	1233		2.71	11									0	0		-4.237	21	1
2016-07-19 15:00:00	1240		2.67	11									0	0		-4.236	22	1
2016-07-19 16:00:00	1240		2.72	11									0	0		-4.236	22	1
2016-07-19 17:00:00	1240		3.05	11									0	0		-4.236	23	1
2016-07-19 18:00:00	1240		3.37	11									0	0		-4.235	23	1
2016-07-19 19:00:00	1240		3.45	10									0	0		-4.235	23	1
2016-07-19 20:00:00	1240		3.11	10									0	0		-4.235	23	1
2016-07-19 21:00:00	1242		2.93	11									0	0		-4.235	23	1
2016-07-19 22:00:00	1249		2.73	10									0	0		-4.234	23	0.2
2016-07-19 23:00:00	1248		2.62	10									0	0		-4.234	23	0
2016-07-20	1250		2.52	9									0	0		-4.233	23	0
2016-07-20 01:00:00	1250		2.38	9									0	0		-4.232	23	0
2016-07-20 02:00:00	1250		2.46	8									0	0		-4.232	22	0
2016-07-20 03:00:00	1242		2.57	8									0	0		-4.231	22	0
2016-07-20 04:00:00	1240		2.58	8									0	0		-4.231	22	0
2016-07-20 05:00:00	1240		2.59	8									0	0		-4.23	22	0
2016-07-20 06:00:00	1240		2.57	8									0	212.1		-4.235	22	0
2016-07-20 07:00:00	1247		2.58	8									0	216		-4.244	22	0.7
2016-07-20 08:00:00	1260		2.73	7									0	216		-4.255	21	1
2016-07-20 09:00:00	1260		2.87	6									0	108		-4.263	21	1
2016-07-20 10:00:00	1258		2.97	6									0	0	752	-4.265	21	1
2016-07-20 11:00:00	1260		3.08	6									0	0		-4.265	21	1
2016-07-20 12:00:00	1260		2.82	6									0	0		-4.263	21	1	-4.7
2016-07-20 13:00:00	1260		2.88	7									0	0		-4.262	22	1
2016-07-20 14:00:00	1260		3.01	7									0	0		-4.261	22	0.9
2016-07-20 15:00:00	1260		2.99	7									0	0		-4.26	22	0.9
2016-07-20 16:00:00	1260		3.15	10									0	0		-4.258	23	0.6
2016-07-20 17:00:00	1266		3.36	9									0	0		-4.257	23	0
2016-07-20 18:00:00	1276		3.72	11									0	0		-4.256	24	0
2016-07-20 19:00:00	1276		3.24	9									0	0		-4.255	24	0.5
2016-07-20 20:00:00	1271		2.98	8									0	0		-4.254	24	0.8
2016-07-20 21:00:00	1276		2.7	8									0	0		-4.253	24	0.8
2016-07-20 22:00:00	1270		2.72	7									0	0		-4.252	24	0.2
2016-07-20 23:00:00	1270		2.77	6									0	0		-4.251	24	0
2016-07-21	1264		2.72	6									0	0		-4.25	24	0
2016-07-21 01:00:00	1267		2.63	6									0	0		-4.25	24	0
2016-07-21 02:00:00	1260		2.5	6									0	0		-4.249	23	0
2016-07-21 03:00:00	1260		2.7	7									0	0		-4.249	23	0
2016-07-21 04:00:00	1260		2.68	8									0	0		-4.248	23	0
2016-07-21 05:00:00	1260		2.66	7									0	0		-4.247	23	0
2016-07-21 06:00:00	1260		2.76	14									0	0		-4.246	23	0
2016-07-21 07:00:00	1260		2.72	37									0	0		-4.246	22	0
2016-07-21 08:00:00	1260		2.75	8									0	0		-4.245	22	0.1
2016-07-21 09:00:00	1260		2.69	8									0	0		-4.244	22	0.8
2016-07-21 10:00:00	1260		2.64	8	1240	3.9	150		5	0.43	1.5		0	0	0	-4.244	22	0.8
2016-07-21 11:00:00	1260		2.69	11									0	0		-4.243	22	1
2016-07-21 12:00:00	1262		2.71	16									0	0		-4.243	23	0.7	-4.6
2016-07-21 13:00:00	1270		2.58	19									0	0		-4.242	23	0.6
2016-07-21 14:00:00	1273		2.45	20									0	0		-4.242	24	1
2016-07-21 15:00:00	1275		2.18	10									0	0		-4.242	24	1
2016-07-21 16:00:00	1281		2.06	8									0	0		-4.241	25	0.9
2016-07-21 17:00:00	1284		1.42	7									0	0		-4.241	25	0.9
2016-07-21 18:00:00	1282		1.42	9									0	0		-4.24	25	0.7
2016-07-21 19:00:00	1280		1.69	9									0	0		-4.24	25	0.8
2016-07-21 20:00:00	1277		1.75	7									0	0		-4.24	25	1
2016-07-21 21:00:00	1280		2.45	7									0	0		-4.239	25	1
2016-07-21 22:00:00	1280		2.58	9									0	0		-4.239	24	0.2
2016-07-21 23:00:00	1280		2.62	8									0	0		-4.238	24	0
2016-07-22	1279		2.57	8									0	0		-4.238	24	0
2016-07-22 01:00:00	1280		2.64	8									0	0		-4.237	24	0
2016-07-22 02:00:00	1280		2.84	7									0	0		-4.236	24	0
2016-07-22 03:00:00	1280		2.53	7									0	0		-4.236	23	0
2016-07-22 04:00:00	1280		2.55	8									0	0		-4.236	23	0
2016-07-22 05:00:00	1280		2.47	11									0	0		-4.235	23	0
2016-07-22 06:00:00	1280		2.47	9									0	0		-4.235	23	0
2016-07-22 07:00:00	1280		2.6	9									0	0		-4.234	23	0
2016-07-22 08:00:00	1280		2.59	9									0	0		-4.234	23	0
2016-07-22 09:00:00	1280		2.55	8									0	0		-4.233	23	0
2016-07-22 10:00:00	1280		2.61	8									0	0	0	-4.232	22	0
2016-07-22 11:00:00	1280		2.55	10									0	0		-4.232	22	0
2016-07-22 12:00:00	1280		2.44	11									0	0		-4.232	23	0.2	-2.3
2016-07-22 13:00:00	1280		2.42	9									0	0		-4.231	23	0.9
2016-07-22 14:00:00	1280		2.17	9									0	0		-4.231	23	0
[truncated: 8,165 more rows]

## Sheet: 2007-2017 grab data
	chlorophyll-a	oxygen	PH	temperature	transparency	suspended solids	N	P	NH4	NO2	NO3	NO3NO2	PO4	KJN	EC
	ug/L	mg/L		°C	m	mg/L	mg N/L	mg P/L	mg N/L	mg N/L	mg N/L	mg N/L	mg P/L	mg N/L	us/cm
2007-01-19 10:00:00	8		7.6	7.5			4.4	0.24	0.65	0.1	2		0.15	2.3	1220
2007-02-22 10:00:00	5		7.5	6			2.2	0.42	0.6	0.04	0.5		0.23	1.6	1400
2007-03-28 10:00:00	7		8.1	9.5			1.8	0.26	0.26	0.01	0.1		0.15	1.7	1230
2007-04-25 10:00:00	230			20			4.9	0.81	0.63	0.03	0.1		0.21	4.9	1410
2007-05-23 10:00:00	10			17			5.5	0.44	3.8	0.02	0.1		0.34	5.5	1250
2007-06-27 10:00:00	8			14.5			3.6	0.74	2.3	0.02	0.1		0.36	3.5	850
2007-07-26 10:00:00	5			18.5			3.6	0.6	2.2	0.04	0.1		0.35	3.5	700
2007-08-29 10:00:00	9			16			5.3	0.46	3.9	0.02	0.1		0.25	5.3	1240
2007-09-18 10:00:00	3			14.2			5.1	0.58	3.8	0.01	0.1		0.4	5	1060
2007-10-25 10:00:00	3			8.9			5.8	0.71	4.4	0.01	0.1		0.25	5.8	1130
2007-11-28 10:00:00	4			6			4	0.53	4	0.02	0.1		0.49	4	1270
2007-12-20 10:00:00	15			2.5			5	1.8	3.3	0.01	0.1		0.25	5	1310
2008-01-14 10:00:00	9		7.6	5.4			5	0.74	3.4	0.03	0.2		0.22	4.8	1220
2008-02-15 10:00:00	2		7.3	4.5			2.8	0.57	2	0.02	0.1		0.05	2.7	1090
2008-03-10 10:00:00	250		7.7	6			2.8	0.28	2.8	0.06	0.3		0.12	2.4	1290
2008-04-17 10:00:00	14		7.1	6.5			2.8	0.61	1.4	0.01	0.1		0.038	2.6	230
2008-05-20 10:00:00	1		7.5	13.4			5.6	0.41	3.9	0.01	0.1		0.26	5.5	1280
2008-06-19 10:00:00	8		7.5	15.9			6.5	0.62	4.8	0.02	0.1	0.05	0.35	6.4	1420
2008-07-17 10:00:00	14		7.4	18.9			3.8	1.4	1.8	0.08	0.1	0.2	1.2	3.5	1110
2008-08-14 10:00:00	3		7.5	16.3			4.8	0.48	3.7	0.02	0.1	0.05	0.4	4.7	1050
2008-09-12 10:00:00	3		7.9	18.5			5.2	0.27	3.9	0.02	0.1	0.13	0.24	5.1	1110
2008-10-14 10:00:00	93		7.6	14			10	2.2	1.2	0.08	0.2	0.26	0.13	10	1010
2008-11-10 10:00:00	2		7.9	9.1			4.8	0.36	3.6	0.01	0.1	0.08	0.19	-1	1260
2008-12-09 10:00:00	1		7.6	3.5			4.6	0.62	3	0.02	0.1	0.13	0.28	4.5	1180
2009-01-22 10:00:00	2		7.5	3.6			5.8	0.65	4.1	0.02	0.1	0.14	0.36	5.7	1320
2009-02-26 10:00:00	9		7.4	6.1			4.2	0.54	2.6	0.02	0.1	0.12	0.23	4.1	1180
2009-03-26 10:00:00	210		6.8	7.1			4.4	1.1	1	0.03	0.2	0.28	0.049	4.1	1150
2009-04-24 10:00:00	5		7.6	13			4	0.42	2.2	0.02	0.1	0.06	0.26	4	1380
2009-05-28 10:00:00	2		7.4	14.3			3.7	0.72	2.6	0.02	0.1	0.1	0.51	3.6	770
2009-06-25 10:00:00	3		7.3	19.1			4.8	0.34	3.6	0.01	0.1	0.05	0.19	4.8	1300
2009-07-30 10:00:00	5		7.5	18.6			4.9	0.46	3.7	0.01	0.1	0.05	0.27	4.8	1180
2009-08-28 10:00:00	1		7.5	17.7			5.6	0.4	4.1	0.02	0.1	0.05	0.21	5.6	1520
2009-09-28 10:00:00	10		7.5	14.4			6.3	0.48	4.9	0.02	0.1	0.06	0.28	6.3	1430
2009-10-28 10:00:00	1		7.4	12.4			4.9	0.25	3.5	0.02	0.1	0.05	0.088	4.9	1270
2009-11-24 10:00:00	17		7.6	9.3			4.5	0.44	2.5	0.02	0.1	0.11	0.24	4.4	1000
2009-12-16 10:00:00	4		7.3	1.3			4.3	0.94	2.8	0.02	0.1	0.06	0.16	4.2	1250
2010-02-08 10:00:00	2		7.5	2.6			4.8	0.81	3.4	0.03	0.1	0.18		4.6	1290
2010-03-03 10:00:00	1		7.5	3.8			4.9	0.54	2.9	0.04	0.2	0.28		4.6	1090
2010-03-31 10:00:00	45		7.3	8			4.6	0.38	2.1	0.01	0.3	0.28		4.4	1270
2010-04-29 10:00:00	30		7.6	16.5			3.2	0.46	1.4	0.05	0.1	0.12		3.1	1500
2010-05-27 10:00:00	7		7.5	13.8			5.2	0.35	3	0.01	0.1	0.05		5.1	1440
2010-06-14 10:00:00	2		7.5	18.4			6.4	0.62	3.9	0.02	0.1	0.05		6.3	1210
2010-07-01 10:00:00	4		7.5	22.6			7	0.54	4.3	0.02	0.1	0.05		7	1440
2010-08-04 10:00:00	8		7.5	18.3			5.5	0.56	4.2	0.01	0.1	0.05		5.5	1400
2010-09-01 10:00:00	7		7.3	15.3			3.5	0.6	2.4	0.02	0.1	0.09		3.5	880
2010-10-04 10:00:00	1		7.5	15.9			4.3	0.34	3.3	0.02	0.1	0.09		4.2	1050
2010-11-03 10:00:00	2		7.4	11.4			4.8	0.47	3.8	0.01	0.1	0.05		4.8	1310
2010-11-30 10:00:00	4		7.3	2.5			4.3	1.4	3.3	0.01	0.1	0.05		4.3	1310
2011-01-06 10:00:00		4.6	7.3	3	0.4		4.4	0.61	3.4	0.02	0.2	0.19		4.2	1210
2011-02-02 10:00:00		1.9	7.3	3.6	0.3		3.1	0.79	2.2	0.01	0.1	0.14		2.9	1140
2011-03-02 10:00:00	5	2.6	7.5	4.1	0.3		4.8	0.52	3.2	0.03	0.2	0.24		4.5	1230
2011-04-06 10:00:00	190	6.4	7.8	10.9	0.4		4.7	0.49	0.82	0.03	0.2	0.24		4.4	1480
2011-05-03 10:00:00	1	1.5	7.7	12.9	0.45		4	0.56	2.3	0.02	0.1	0.05		3.9	1620
2011-06-15 10:00:00	8	2	7.7	16.4	0.6		4.3	0.38	2.6	0.05	0.1	0.15		4.2	1650
2011-07-05 10:00:00	3	0.9	7.5	17.8	0.6		3.3	0.39	1.6	0.04	0.1	0.11		3.2	1270
2011-08-09 10:00:00	3	1.1	7.4	18	0.5		4.2	0.4	2.8	0.02	0.1	0.09		4.1	1250
2011-09-01 10:00:00	3	1.4	7.3	13.9	0.5		2.3	0.98	1	0.01	0.1	0.05		2.3	1240
2011-10-06 10:00:00	6	1.5	7.5	15.7	0.3		4.6	0.48	3.2	0.01	0.1	0.05		4.5	1420
2011-11-01 10:00:00		1.1	7.5	11.3	0.4		5	0.5	3.8	0.01	0.1	0.05		5	1260
2011-11-30 10:00:00		3.7	7.5	6.8	0.3		3.9	0.31	2.8	0.01	0.1	0.05		3.9	1390
2012-01-09 10:00:00		3.3	7.5	6.7	0.5	16	4.2	0.3	2.9	0.04	0.3	0.38		3.8	1020
2012-03-13 10:00:00	12	4.7	7.4	9.1	0.3	5	3.3	0.22	2.1	0.02	0.1	0.15		3.1	1220
2012-04-05 10:00:00	120	3.2	7.4	8.4	0.2	22	3.4	0.45	1.4	0.02	0.1	0.1		3.3	1330
2012-05-03 10:00:00	97	11.3	7.6	14.4	0.4	18	2.6	0.29	0.39	0.02	0.1	0.14		2.4	1190
2012-06-13 10:00:00	3	1.3	7.5	15.3	0.4	3	5.5	0.41	4.4	0.01	0.1	0.05		5.5	1230
2012-07-05 10:00:00	6	1.8	7.6	20.7	0.8	12	5.1	0.35	3.8	0.02	0.1	0.05		5	1260
2012-08-01 10:00:00	10	1.8	7.5	17.7	0.6	10	4.1	0.63	2.8	0.03	0.1	0.08		4.1	1160
2012-08-30 10:00:00	2	1.5	7.6	18.2	0.4	4	4.4	0.36	2.5	0.02	0.1	0.05		4.4	1090
2012-10-02 10:00:00	2	2.4	7.4	15.3	0.5	6	4.3	0.27	3.6	0.02	0.1	0.06		4.2	1080
2012-11-01 10:00:00		0.8	7.4	8	0.3	9	3.9	0.33	3	0.02	0.1	0.05		3.9	1030
2012-12-03 10:00:00		4.1	7.5	2.9	0.6	12	3.2	0.22	2	0.02	0.3	0.33		2.9	780
2013-02-05 10:00:00		3	7.5	5.3	0.4	12	4	0.47	2.9	0.03	0.2	0.18		3.8	1120
2013-03-07 10:00:00	480	7	7.3	6.8	0.3	51	6.7	0.66	1.9	0.01	0.2	0.17		6.6	1120
2013-04-04 10:00:00	82	7.2	7.6	4.7	0.4	22	3.9	0.58	1.7	0.01	0.1	0.08		3.9	1340
2013-05-02 10:00:00	180	10	7.6	11.3	0.4	24	3.3	0.45	0.53	0.02	0.1	0.06		3.2	1270
2013-06-06 10:00:00	190	3.2	7.3	15.3	0.4	23	3.6	0.74	0.24	0.01	0.1	0.05		3.6	1190
2013-07-04 10:00:00	21	1.5	7.6	18.1	0.3	26	6.2	0.62	4.2	0.01	0.1	0.05		6.2	1220
2013-07-31 10:00:00	130	1	7.6	19.9	0.5	4	6.2	0.68	4.5	0.01	0.1	0.05		6.1	1330
2013-09-05 10:00:00	130	4.2	7.7	18.8	0.4	19	4	0.34	0.87	0.13	0.4	0.58		3.4	1410
2013-10-01 10:00:00	8	1.1	7.4	11.7	0.4	12	3.7	0.29	2.3	0.03	0.1	0.06		3.6	1230
2013-11-04 10:00:00		2.9	7.4	9.5	0.5	11	3.6	0.38	2.2	0.01	0.1	0.08		3.5	830
2013-12-05 10:00:00		1.5	7.2	5.8	0.3	17	4	0.54	2.9	0.01	0.1	0.05		4	1310
2014-01-06 10:00:00		1.8	7.4	7.2	0.4	10	4	0.5	3	0.02	0.08	0.09		3.9	1240
2014-02-06 10:00:00		3	7.4	5.7	0.4	7	4	0.36	3.1	0.02	0.13	0.14		3.8	1230
2014-03-03 10:00:00	160	11.7	7.9	6.2	0.4	23	3.9	0.37	0.76	0.03	0.76	0.79		3.1	1100
2014-03-31 10:00:00	14	2.9	7.5	11.5	0.5	5	3.1	0.5	1.4	0.03	0.14	0.16		3	1210
2014-05-01 10:00:00	12	1	7.4	14.7	0.4	22	3.9	0.78	1.7	0.01	0.02	0.05		3.9	1290
2014-06-02 10:00:00	5	0.9	7.5	16.6	0.6	13	4.8	0.63	3.7	0.01	0.02	0.05		4.8	1130
2014-06-30 10:00:00	5	2.2	7.6	18.1	0.2	13	5.5	0.52	4	0.01	0.04	0.05		5.4	1350
2014-07-31 10:00:00	5	1.2	7.5	19.7	0.5	6	4.4	0.9	2.6	0.02	0.09	0.11		4.3	740
2014-09-03 10:00:00	8	1.8	7.5	17.5	0.6	5	4.1	0.35	3.2	0.01	0.02	0.05		4.1	1030
2014-10-01 10:00:00	8	1.4	7.5	16.5	0.3	9	5.6	0.48	4.6	0.01	0.03	0.05		5.6	1300
2014-11-04 10:00:00		2.2	7.5	11.4	0.35	9	4.8	0.79	4.2	0.01	0.02	0.05		4.8	1130
2014-12-02 10:00:00		2.5	7.2	4.4	0.3	19	3.7	0.52	3.2	0.01	0.01	0.05		3.7	1220
2015-01-07 10:00:00		3.1	7.6	3.6	0.4	11	4.1	0.37	3.1	0.01	0.09	0.1		4	1160
2015-02-05 10:00:00		3.5	7.4	2.9	0.3	33	4.8	0.54	2.5	0.04	0.18	0.22		4.6	1100
2015-03-03 10:00:00	6	4.5	7.7	5.3	0.3	16	4	0.72	3.1	0.02	0.19	0.21		3.8	1170
2015-04-01 10:00:00	210	8.4	7.9	7.7	0.4	23	3.5	0.44	0.7	0.03	0.45	0.48		3.1	1060
2015-05-04 10:00:00	330	2.2	7.4	12.3	0.3	46	5.3	0.72	1.4	0.01	0.02	0.05		5.3	1150
2015-06-02 10:00:00	23	1.7	7.5	14	0.3	17	4.2	0.84	2.5	0.01	0.02	0.05		4.1	1280
2015-07-01 10:00:00	5	1.7	7.6	20.8	0.6	6	6.5	0.8	4.5	0.01	0.02	0.05		6.5	1480
2015-08-06 10:00:00	7	1.2	7.4	20.1	0.5	4	4.1	0.84	3.1	0.01	0.02	0.05		4	1170
2015-09-03 10:00:00	9	1.6	7.4	16.1	0.6	10	4.1	0.86	2.3	0.02	0.06	0.07		4	940
2015-10-01 10:00:00	5	1.7	7.4	12.5	0.5	5	4.6	0.4	3.7	0.01	0.02	0.05		4.6	1180
2015-11-04 10:00:00		1.1	7.4	9.6	0.4	10	5.6	0.65	4.7	0.01	0.01	0.05		5.6	1270
2015-12-02 10:00:00		2.9	7.2	9.2	0.4	7	3.6	0.35	1.9	0.03	0.66	0.69		2.9	730
2016-01-07 10:00:00		2.2	7.4	6.3	0.4	5	5.1	0.44	4.2	0.01	0.13	0.14		4.9	1110
2016-02-02 10:00:00		2.5	7.4	8	0.4	9	4.6	0.31	3	0.03	0.49	0.52		4	1050
2016-03-08 10:00:00	5	4.3	8.9	4.9	0.4	4	3.8	0.37	2.4	0.03	0.28	0.31		3.5	890
2016-04-05 10:00:00	120	7.8	7.5	11.9	0.4	24	3.1	0.4	0.9	0.01	0.06	0.07		3	1110
2016-05-03 10:00:00	380	11.4	7.7	12.5	0.4	40	4.6	0.77	0.03	0.02	0.1	0.11		4.5	1060
2016-06-02 10:00:00	5	1.6	7.5	17.8	0.5	10	5	0.6	3.9	0.01	0.02	0.05		4.9	1090
2016-06-20 10:00:00		1.7	7.5	17.4	0.4	7	5.9	0.69	4.6	0.01	0.01	0.05		5.9	1190
2016-07-01 10:00:00	5	1.4	7.3	17.5	0.4	5	4.3	0.75	3.6	0.01	0.05	0.06		4.2	870
2016-07-21 10:00:00		1.5	7.5	22.1	0.6	5	5	0.43	3.9	0.01	0.02	0.05		5	1240
2016-08-04 10:00:00	5	1.7	7.5	18.4	0.6	1	5.4	0.52	4.1	0.01	0.02	0.05		5.4	1240
2016-08-17 10:00:00		1.3	7.4	19.2	0.4	6	4.6	0.53	3.7	0.01	0.02	0.05		4.5	1210
2016-09-13 10:00:00	5	2.3	7.5	20.8	0.6	3	5.3	0.4	4.2	0.01	0.01	0.05		5.3	1220
2016-09-19 10:00:00		1.2	7.5	18	0.7	5	5.3	0.34	4.2	0.01	0.01	0.05		5.3	1290
2016-10-06 10:00:00	5	2	7.3	11.8	0.3	6	4.5	0.49	3.8	0.01	0.02	0.05		4.5	1190
2016-10-19 10:00:00		4.8	7.5	11	0.5	5	4.5	0.38	3.4	0.02	0.14	0.15		4.3	940
2016-11-03 10:00:00		2.5	7.4	9.2	0.4	7	5	0.45	4.2	0.01	0.02	0.05		4.9	1090
2016-11-14 10:00:00		2.7	7.1	4.3	0.5	17	4.9	0.55	3.8	0.01	0.19	0.2		4.7	1060
2016-12-02 10:00:00		0	7.2	6.9	0.15	21	4.5	0.97	2.9	0.01	0.01	0.05		4.5	1130
2016-12-21 10:00:00		2.9	7.1	4.9	0.1	29	5.2	1.2	4	0.01	0.03	0.05		5.2	1280
2017-01-04 10:00:00		2.6	7.5	4.8	0	15	6.1	0.92	5	0.01	0.04	0.05		6.1	1430
2017-01-17 10:00:00		3.6	8.8	3.6	0		4.7	0.75	3.4	0.03	0.06	0.09		4.7	1130
2017-02-03 10:00:00		4.3	7.2	7.1	0	12	4	0.44	2.8	0.01	0.04	0.05		4	1180
2017-02-16 10:00:00		6.8	7.2	4.5	0.3		5.4	0.91	3.9	0.02	0.1	0.11		5.3	1300
2017-03-01 10:00:00	120	6.4	7.6	6	0.4	14	4.7	0.58	2.6	0.03	0.25	0.28		4.4	1030
2017-03-15 10:00:00		17.2	7.7	9.2	0.3		5.2	0.63	0.54	0.06	0.44	0.5		4.7	1010
2017-04-06 10:00:00	5	1.7	7.2	10.7	0.3	25	4	0.58	2.4	0.01	0.02	0.05		4	1300
2017-04-24 10:00:00		9.6	7.7	10.5	0.4		3.5	0.38	0.72	0.04	0.2	0.24		3.3	1270
2017-05-03 10:00:00	95	9.6	7.8	12.1	0.4	21	2.9	0.43	0.13	0.01	0.03	0.05		2.9	1330
2017-05-16 10:00:00			7.8	18	70		3.8	0.44	1.9	0.02	0.02	0.05		3.7	1260
2017-06-01 10:00:00	5	1.4	7.5	18.4	0.6	14	7	1.1	4.7	0.01	0.01	0.05		7	1100
2017-06-12 10:00:00			7.5	19	0.4		5.7	0.9	4.5	0.01	0.01	0.05		5.6	1270
2017-07-03 10:00:00	5	1.2	7.6	17.7	0.5	10	6.5	0.95	4.9	0.01	0.02	0.05		6.4	1390
2017-08-01 10:00:00	5	1.4	7.4	19.2	0.5	4	4.7	0.56	3.1	0.02	0.07	0.09		4.7	990
2017-09-01 10:00:00	5	1.4	7.3	16.7	0.5	5	3.9	0.48	2.9	0.01	0.06	0.07		3.9	910
2017-10-02 10:00:00	18	1.4	7.3	14.6	0.5	8	4.9	0.33	3.4	0.01	0.03	0.05		4.8	1210

## Sheet: flux
month	NH4	P
	kg N/d	kg P/d
1	1.7805	0.564162
2	1.26113	0.369643
3	1.31447	0.25763
4	1.87029	0.109008
5	2.57763	0.343087
6	3.33534	0.860237
7	2.62609	0.540481
8	4.07486	0.517828
9	4.00467	0.613003
10	0.322893	0.236706
11	0.795583	0.171422
12	0.248602	0.162816
