# Supplementary material for: Drivers of nitrogen and phosphorus dynamics in a groundwater-fed urban catchment revealed by high-frequency monitoring
Source: Copernicus journal article supplement (doi:10.5194/hess-25-69-2021), 2021-01-05
Supplement: Supplementary file [file hess-25-69-2021-supplement-title-page.pdf › hess-25-69-2021-supplement-title-page.pdf]

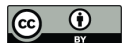

## *Supplement of*

# **Drivers of nitrogen and phosphorus dynamics in a groundwater-fed urban catchment revealed by high-frequency monitoring**

**Liang Yu et al.**

*Correspondence to:* Liang Yu ([xiaobaidrawing@gmail.com](mailto:xiaobaidrawing@gmail.com))

- [hess-25-69-2021-supplement-title-page.pdf](#)
- Supplement
  - [Data.xlsx](#)
  - [Study of water balance.xlsx](#)
  - [Supplementary information.odt](#)

The copyright of individual parts of the supplement might differ from the CC BY 4.0 License.
